# Supplementary material for: Design, synthesis and biological evaluation of naphthalene-1,4-dione analogues as anticancer agents
Source: Royal Society of Chemistry journal article supplement (doi:10.1039/d4md00987h), 2025-01-01

Supporting Information

**Design, synthesis and biological evaluation of naphthalene-1,4-dione analogues as anticancer agents**

Yao Cheng<sup>a</sup>, Tsz Tin Yu<sup>a</sup>, Ellen M. Olzomer<sup>b</sup>, Martina Beretta<sup>b</sup>, Alice Katen<sup>a</sup>, Jacky Su<sup>a</sup>, John Patrick Jones<sup>a</sup>, David StC Black<sup>a</sup>, Kyle L. Hoehn<sup>b</sup>, Frances L. Byrne<sup>b,\*</sup> and Naresh Kumar<sup>a,\*</sup>

<sup>a</sup> School of Chemistry, University of New South Wales, Sydney, NSW 2052, Australia

<sup>b</sup> School of Biotechnology and Biomolecular Sciences, University of New South Wales, Sydney, NSW 2052, Australia

\* Corresponding authors.

Contents of Supporting Information

|                                                                                                                                                                    |    |
|--------------------------------------------------------------------------------------------------------------------------------------------------------------------|----|
| Fig. S1. Effect of thiol-containing compounds on cytotoxicity of compound (a) <b>BH10</b> and (b) compound <b>44</b> .....                                         | S2 |
| Fig. S2. Effect of <b>BH10</b> (a) and its analogues <b>21</b> (b) and <b>44</b> (c) on the percentage of oxygen consumption rate (OCR) in HEC1A cancer cells..... | S2 |
| Fig. S3. <i>In vivo</i> pharmacokinetic profiling of compound <b>44</b> . ....                                                                                     | S3 |
| NMR spectra of final products.....                                                                                                                                 | S4 |

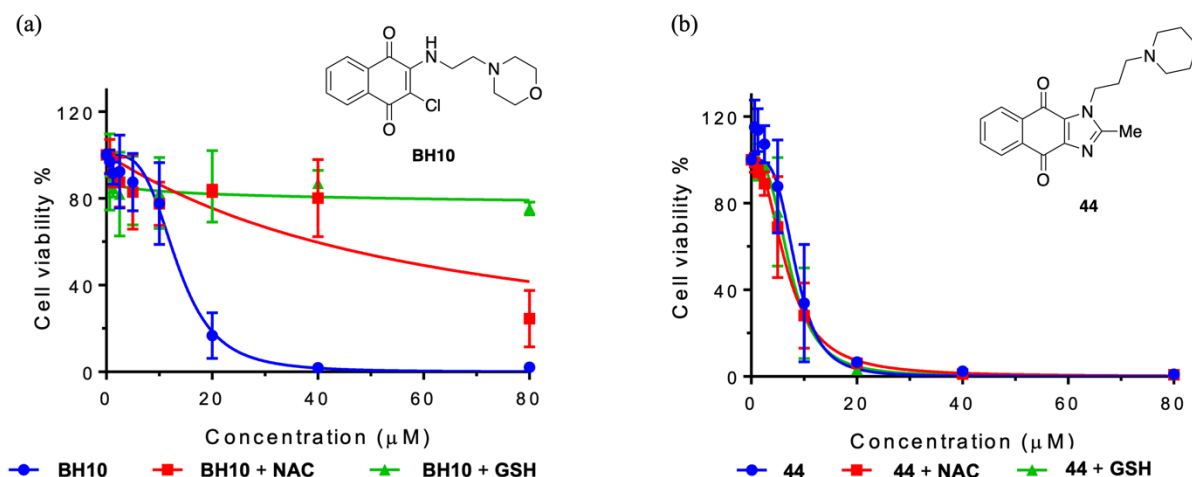

**Fig. S1.** Effect of thiol-containing compounds on cytotoxicity of compound (a) **BH10** and (b) compound **44**. The thiol rescue experiment was conducted following the standard MTT assay protocol with an additional step. On Day 1, HEC1A cancer cells were seeded as per the standard protocol. On Day 2, cells were pre-treated with NAC or GSH (2 mM) for 40 minutes, followed by the addition of test compounds. The cells were then incubated for 48 hours according to the standard MTT assay protocol. (a) HEC1A cancer cells treated with BH10 were rescued by the thiol-containing compounds NAC and GSH as BH10 lost its cytotoxicity as demonstrated by the increased  $\text{IC}_{50}$  value of 58.00  $\mu\text{M}$  and greater than 80.00  $\mu\text{M}$  with NAC and GSH pre-treatment, respectively. (b) Pretreating cancer cells with either NAC or GSH did not rescue the cytotoxicity of compound **44** as no significant change in  $\text{IC}_{50}$  values from the control group were observed.

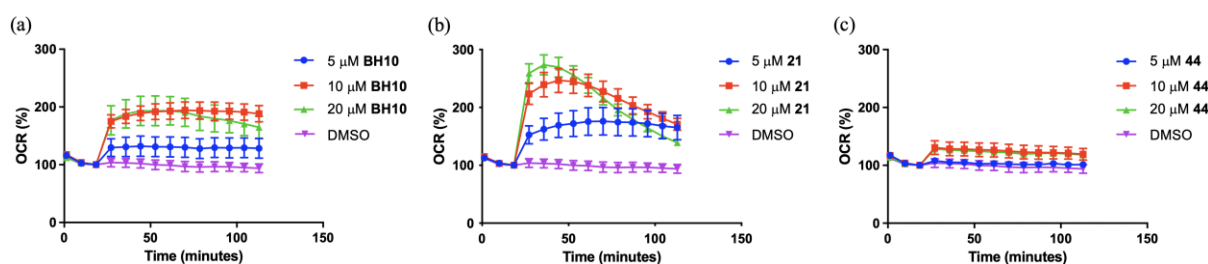

**Fig. S2.** Effect of **BH10** (a) and its analogues **21** (b) and **44** (c) on the percentage of oxygen consumption rate (OCR) in HEC1A cancer cells. HEC1A cells were treated with **BH10**, **21**, and **44** at concentrations of 5  $\mu\text{M}$ , 10  $\mu\text{M}$ , and 20  $\mu\text{M}$ , with DMSO as the vehicle control. OCR, normalized to basal levels (defined as 100%), was measured over a 120-minute period.

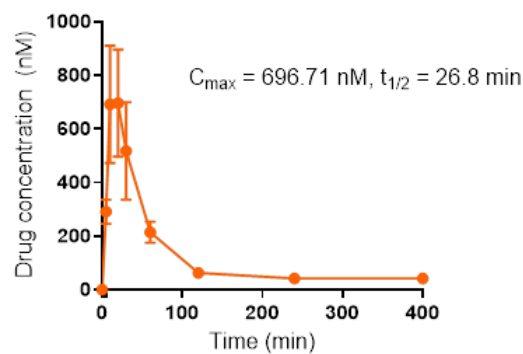

**Fig. S3.** *In vivo* pharmacokinetic profiling of compound **44**. Mice were administered the compound via oral gavage, and blood samples were collected from the tail at regular intervals. The collected blood was centrifuged to obtain plasma, which was then treated with 10% methanol in acetonitrile to precipitate proteins. Quantification of the compound in plasma was performed using mass spectrometry analysis of each sample and corresponding compound standards, enabling the generation of pharmacokinetic profiles over time. Compound **44** achieved a maximum plasma concentration of 696.71 nM with a half-life of 26.8 min.

# NMR spectrum:

5

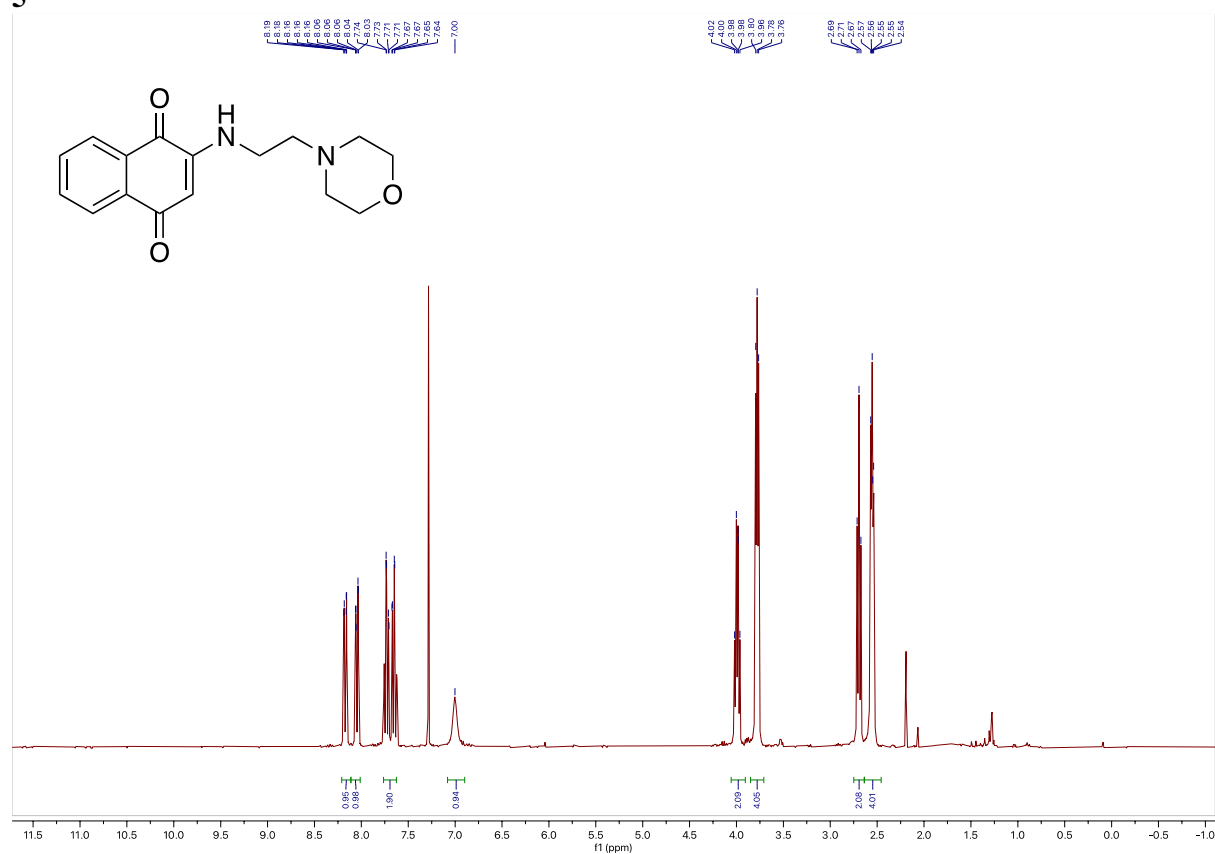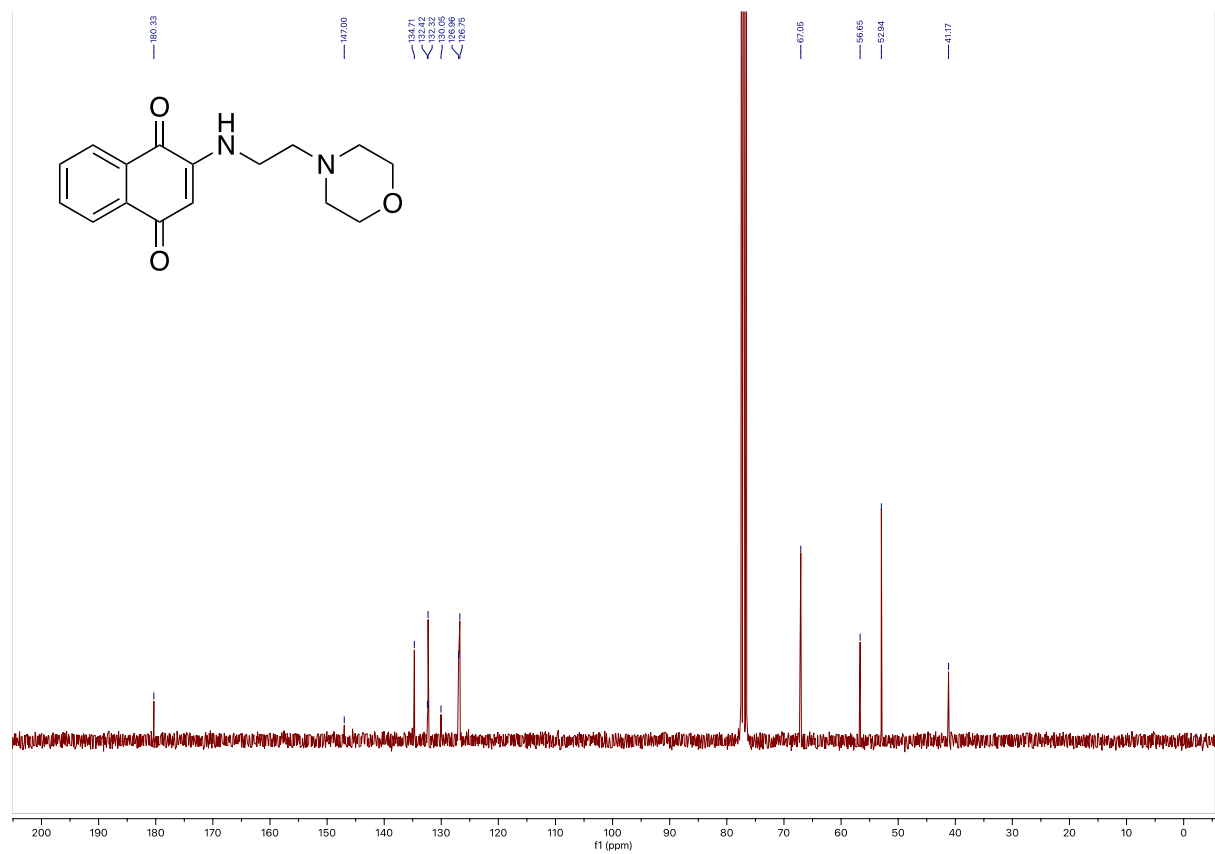

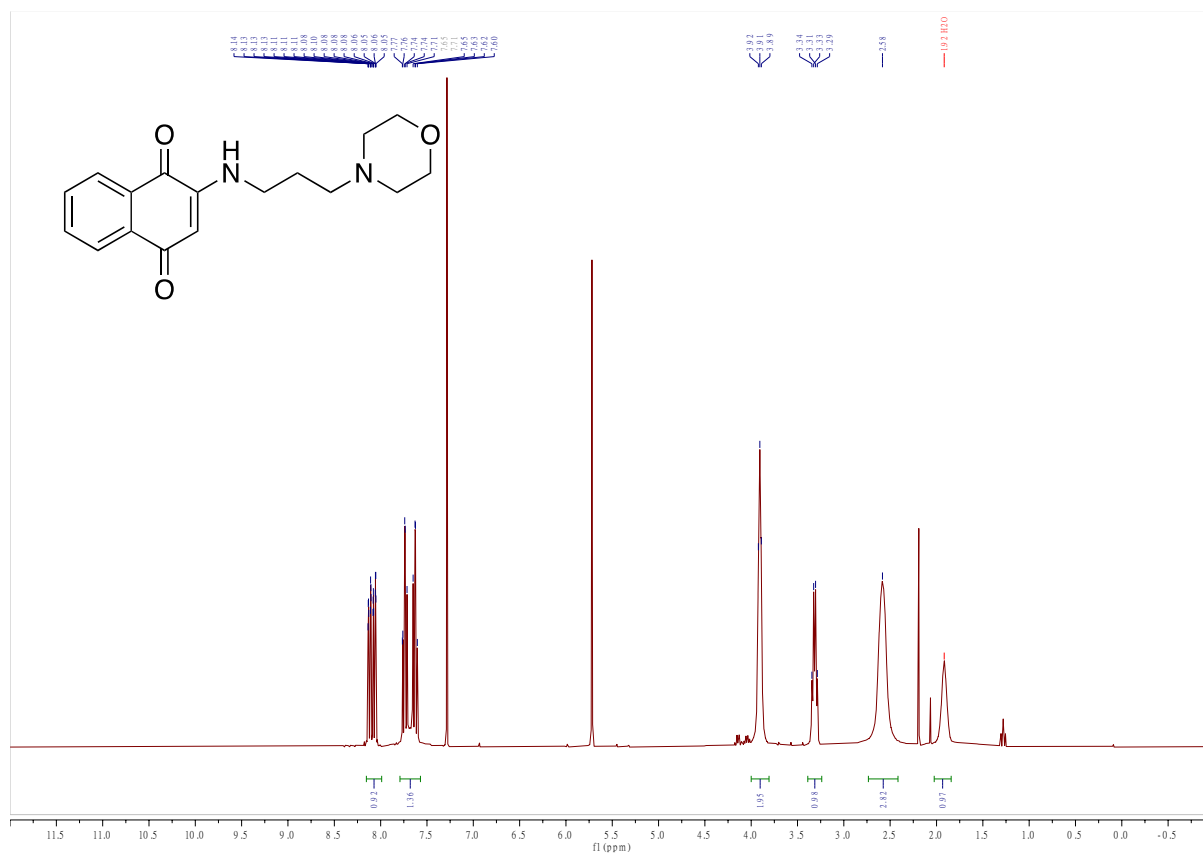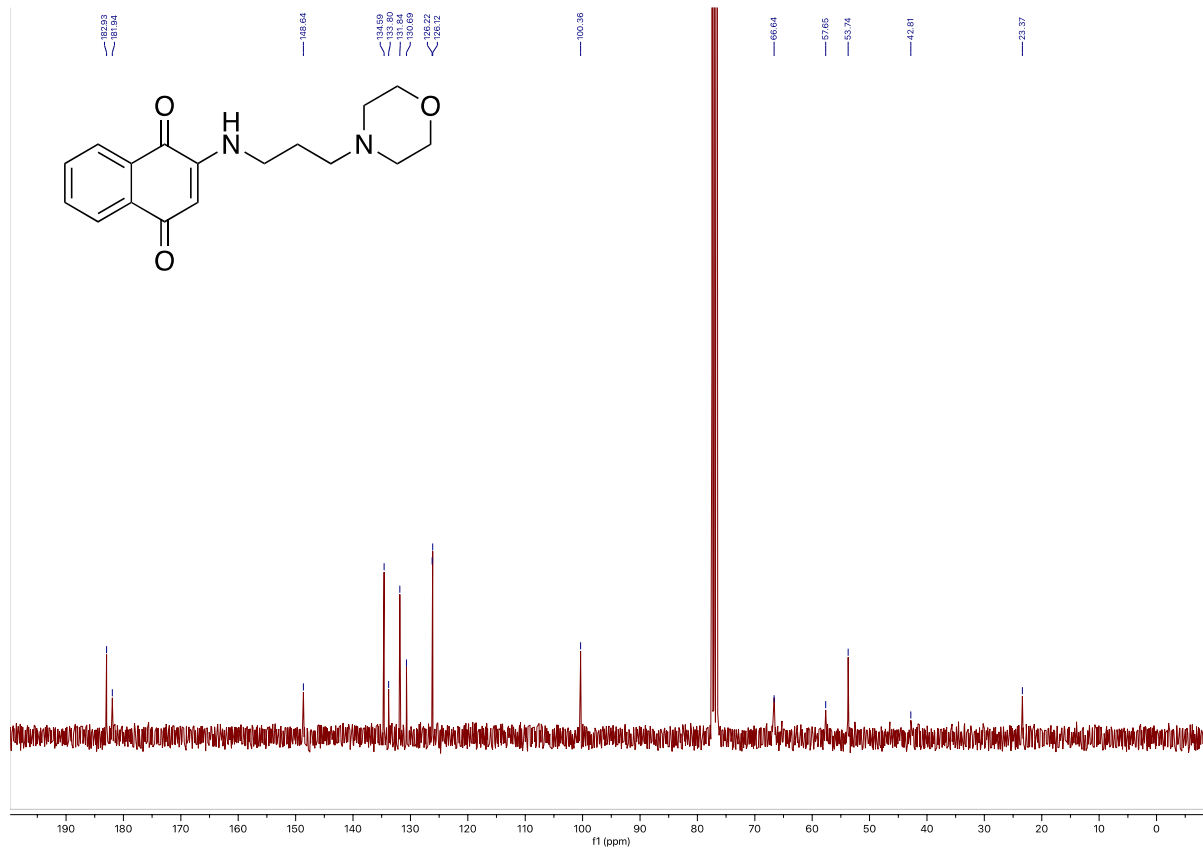

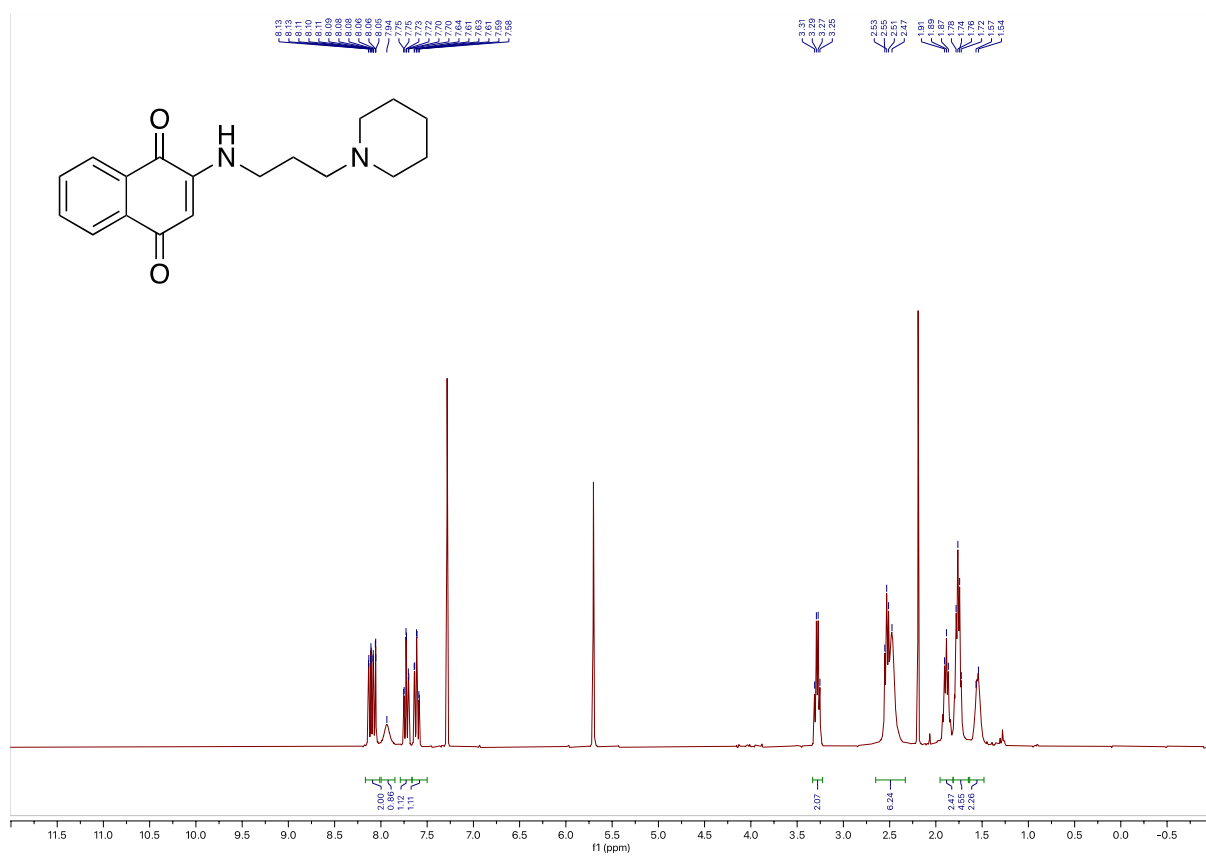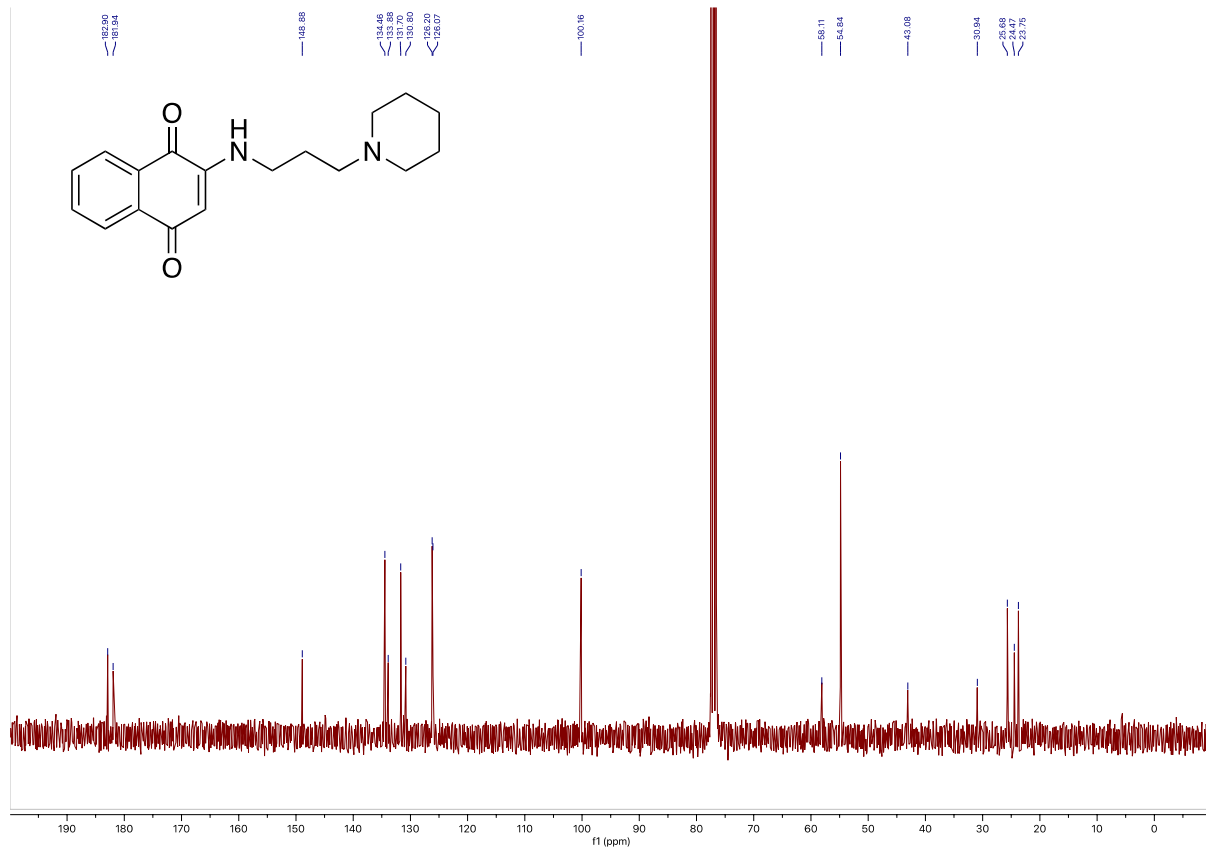

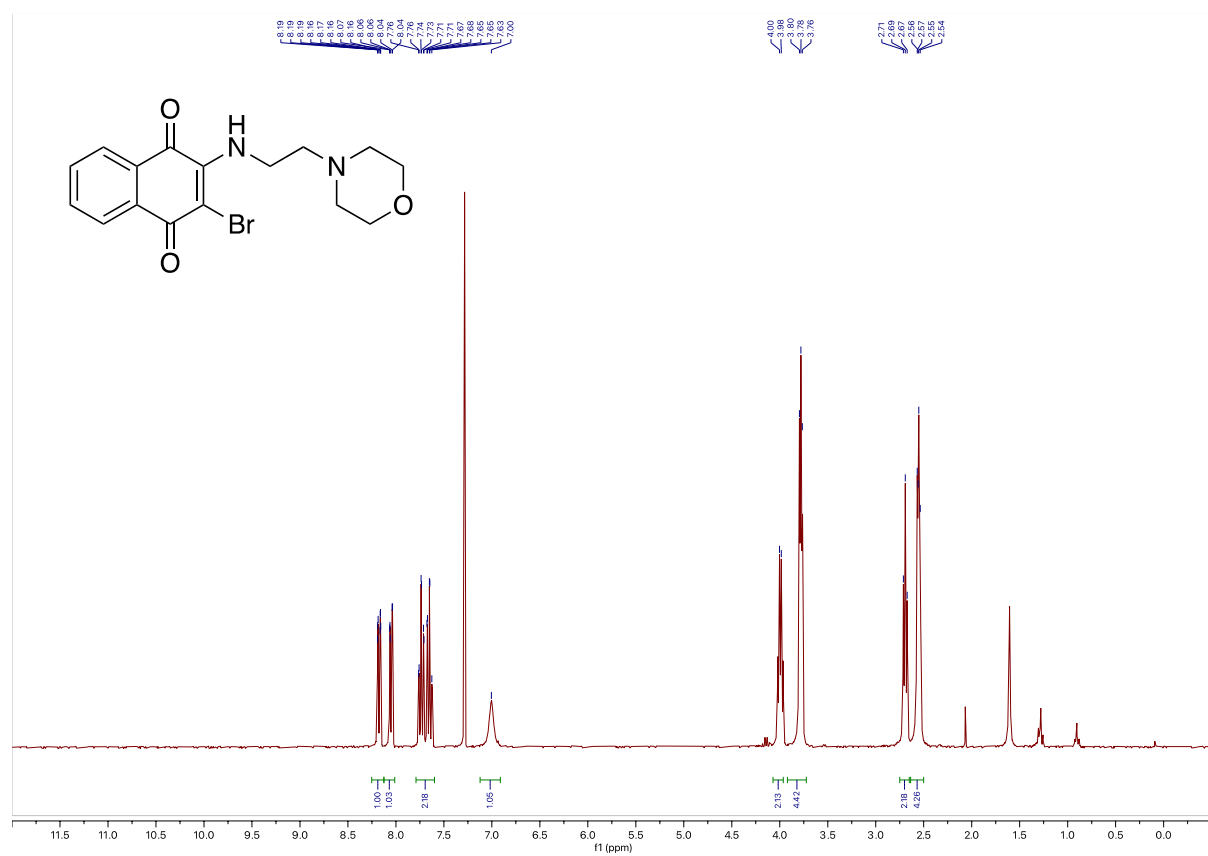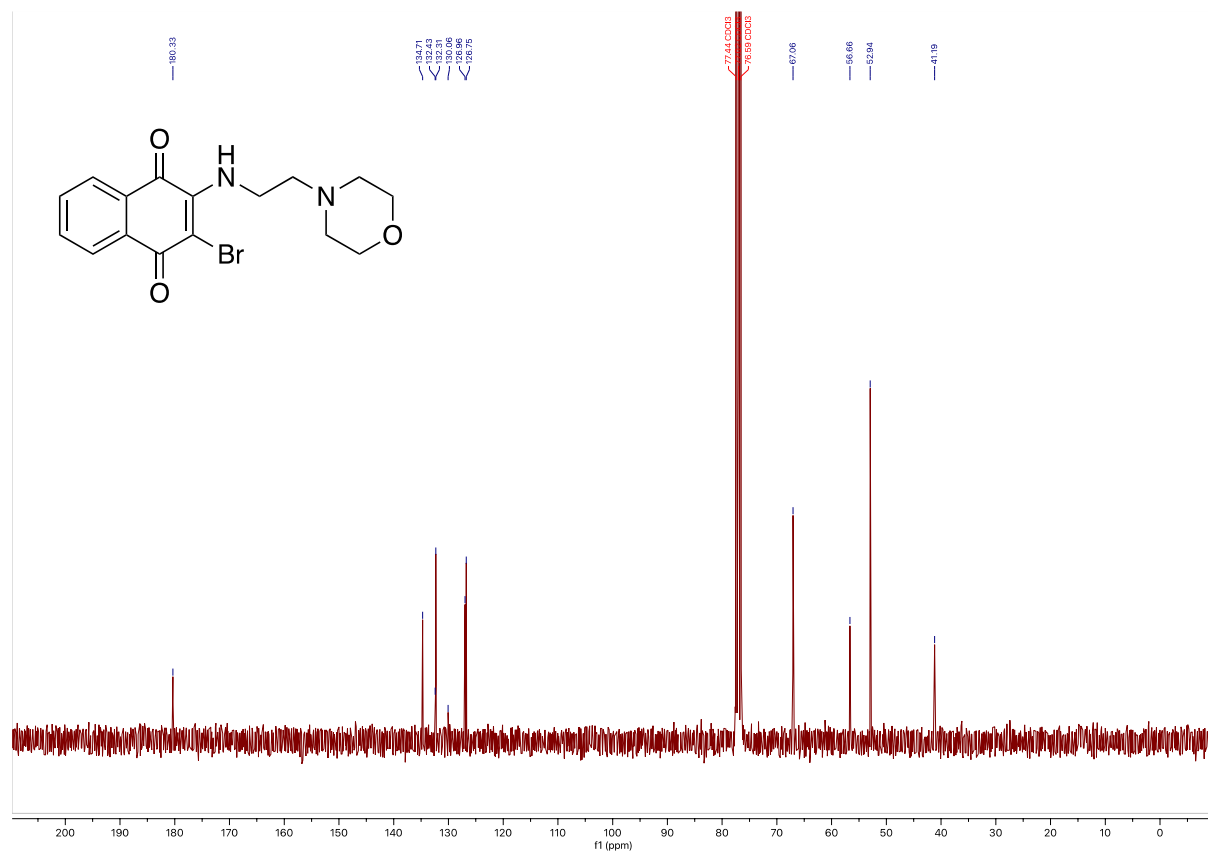

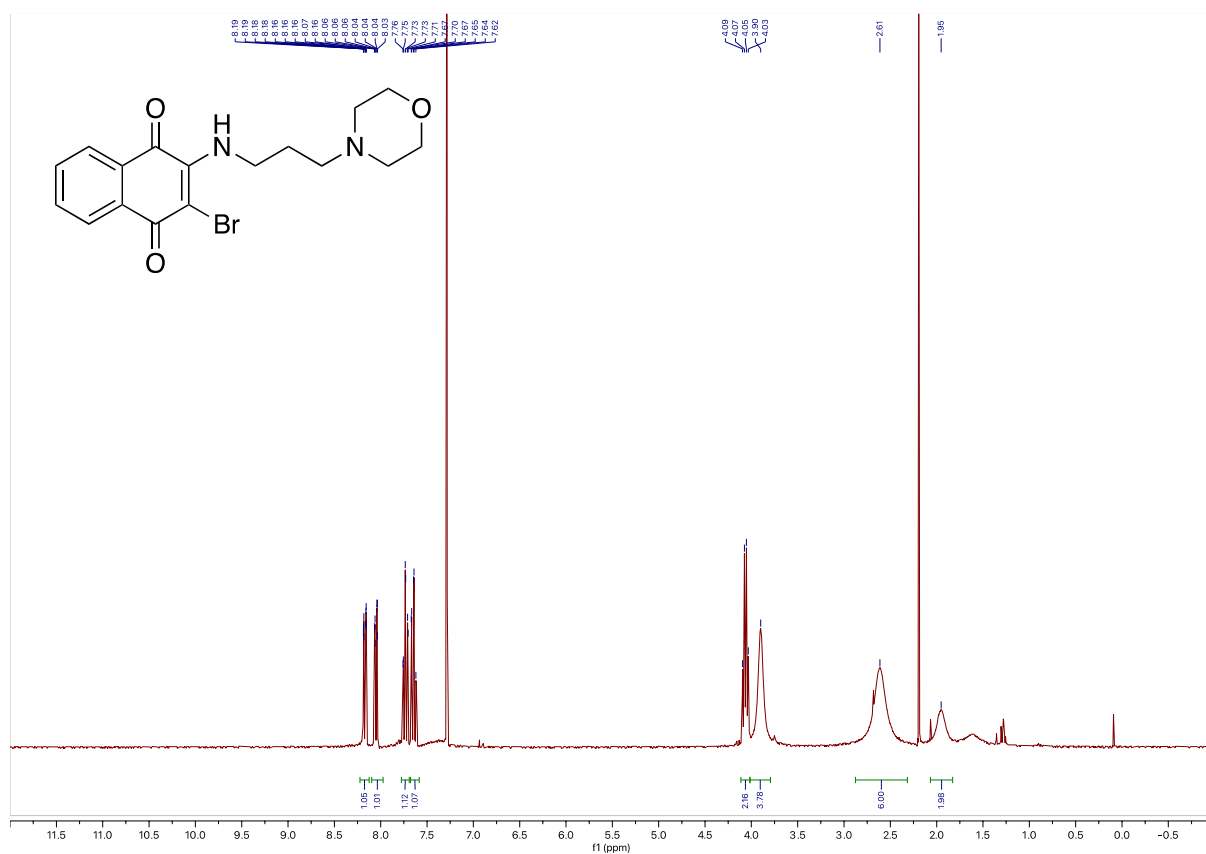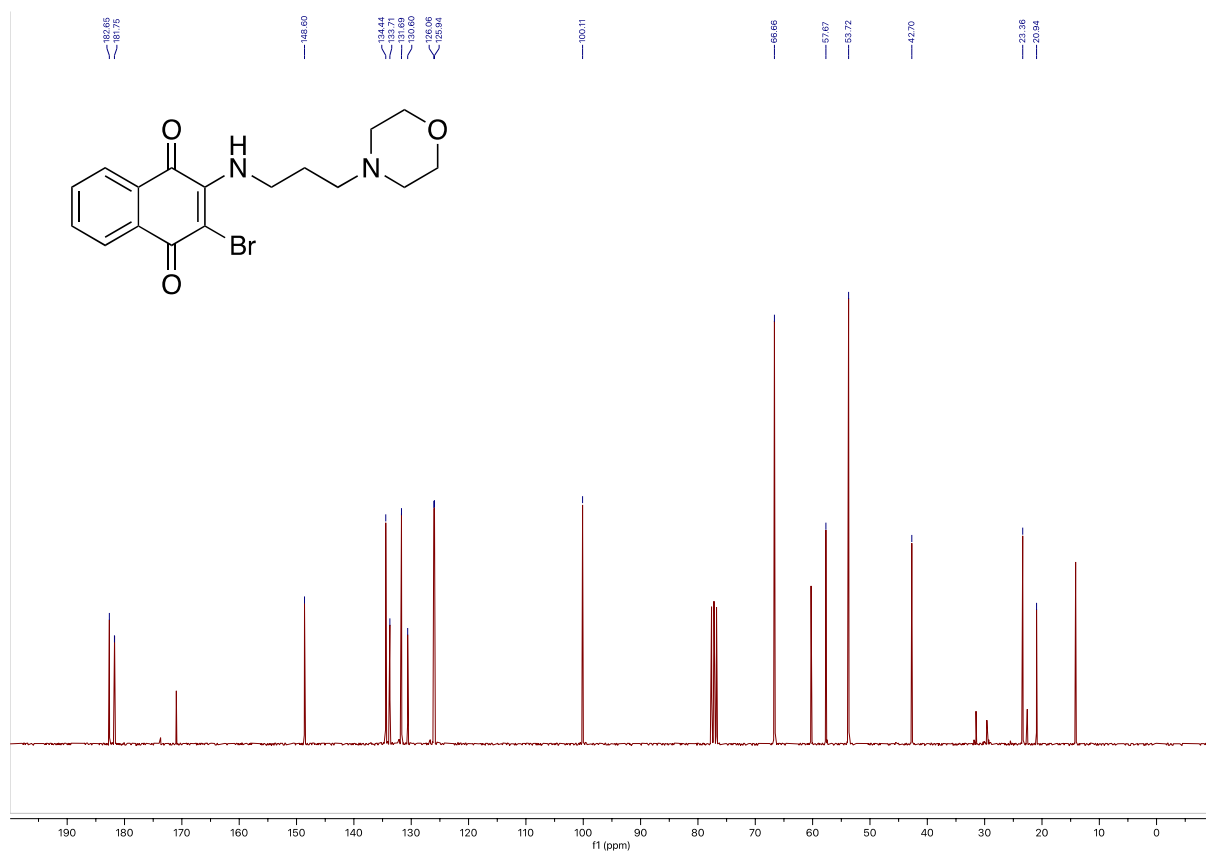



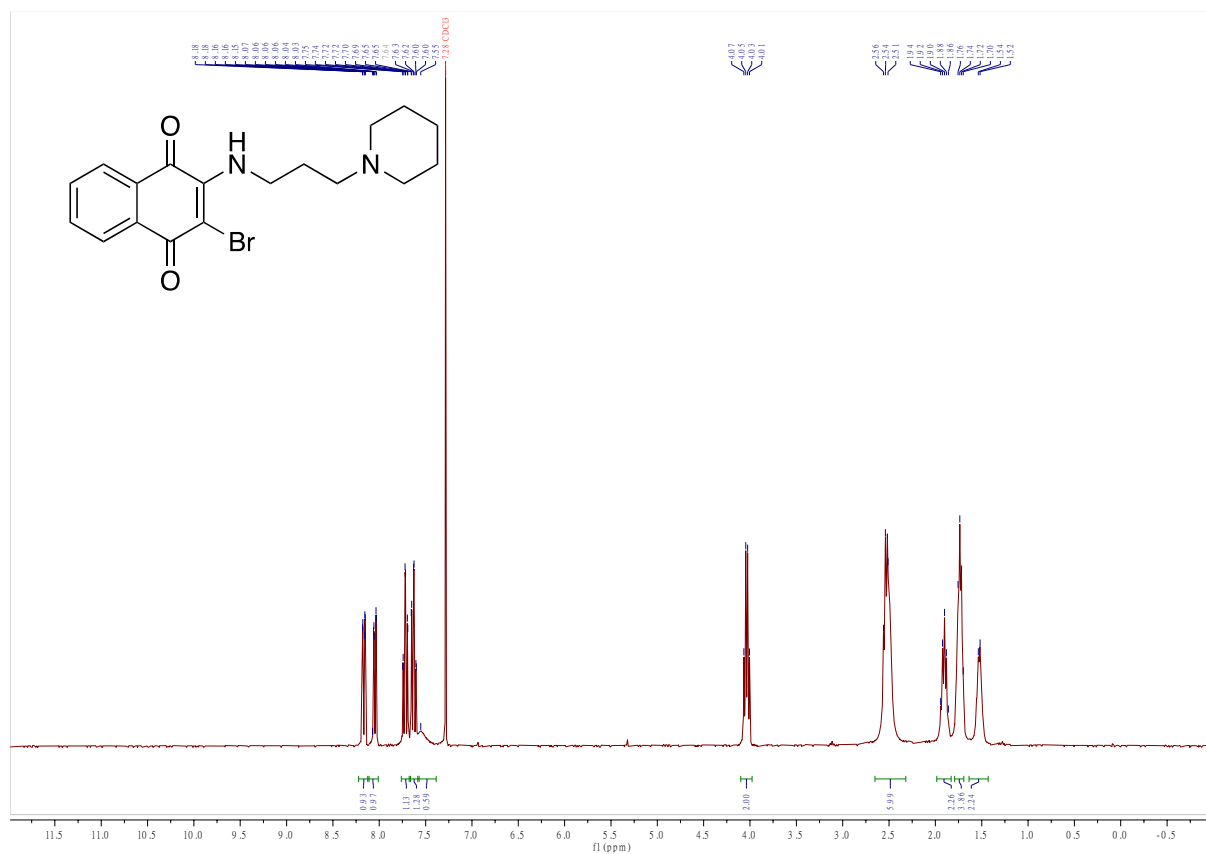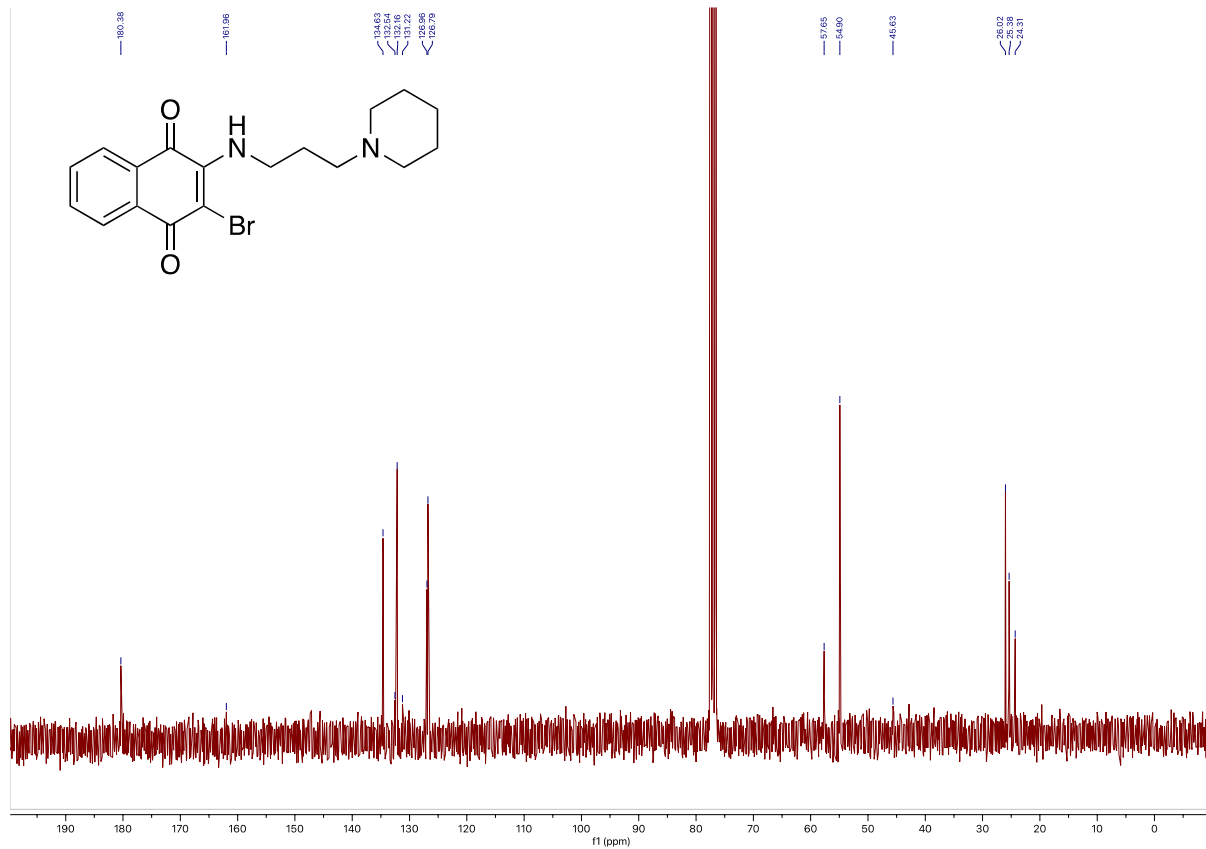

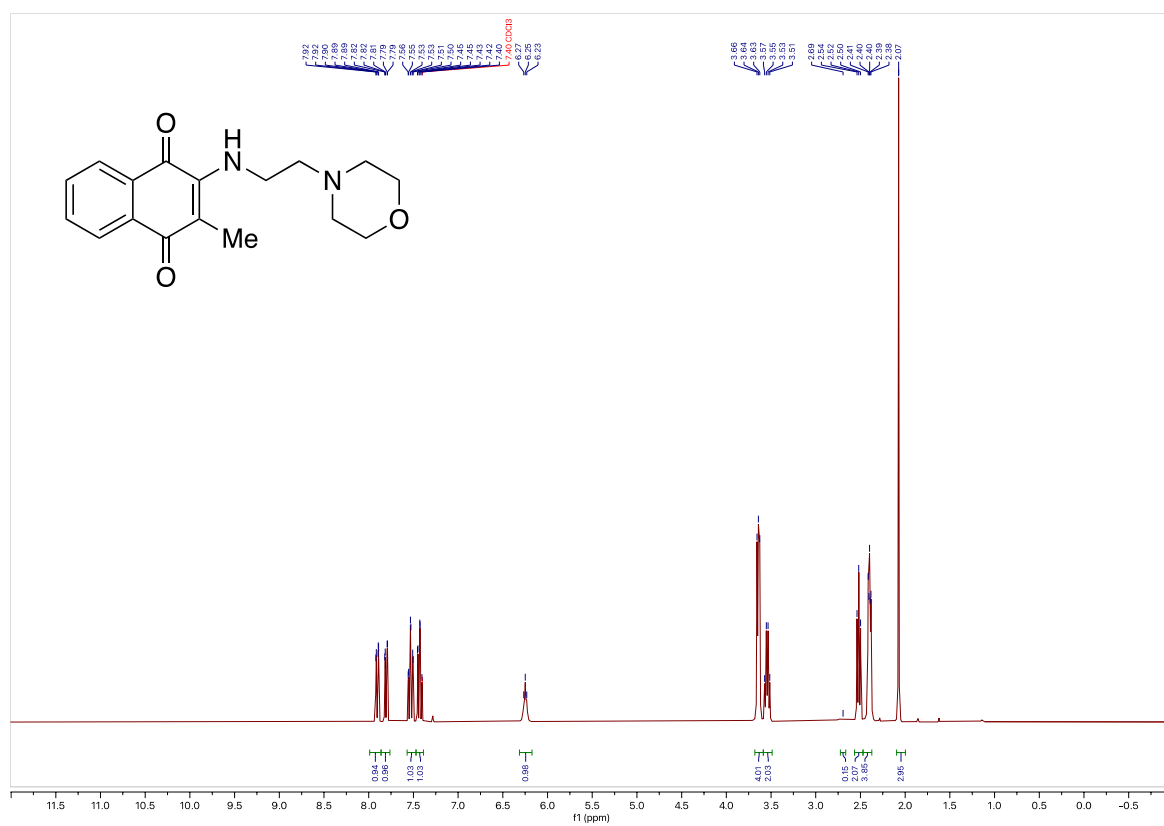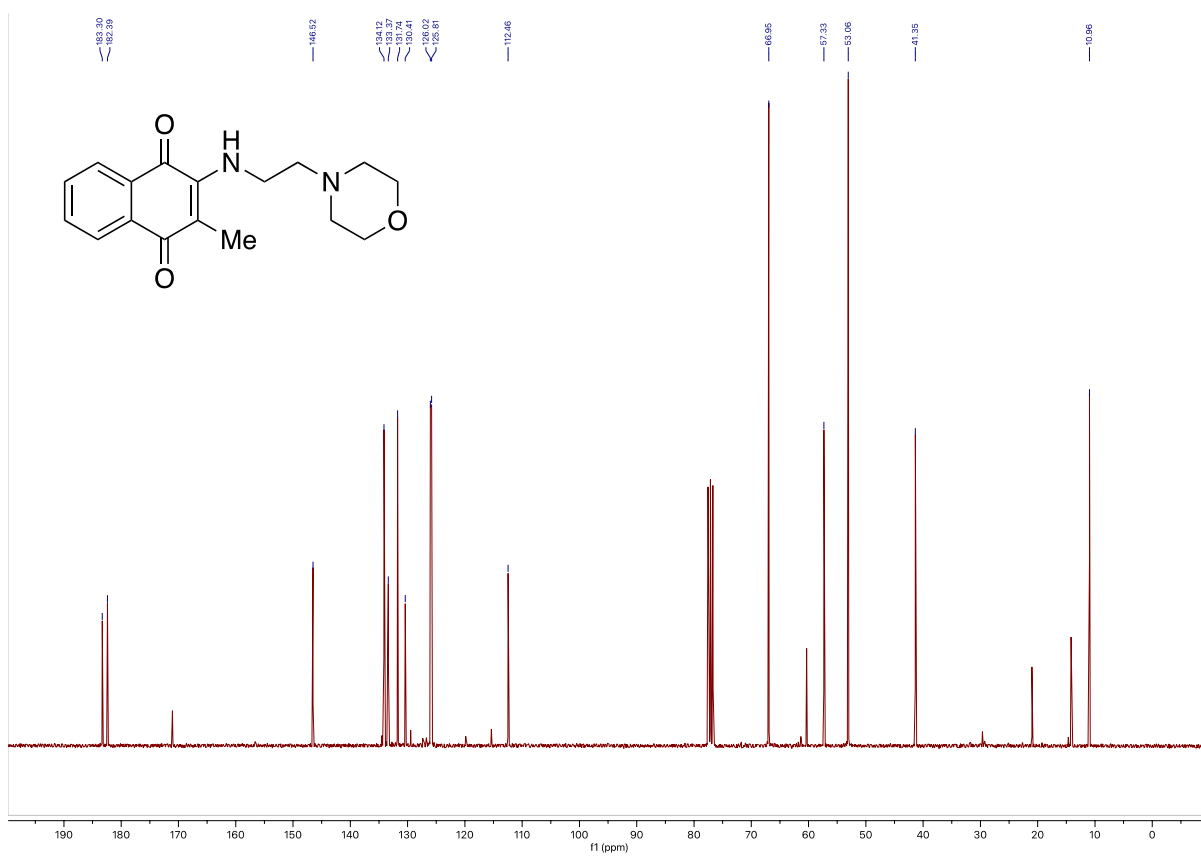

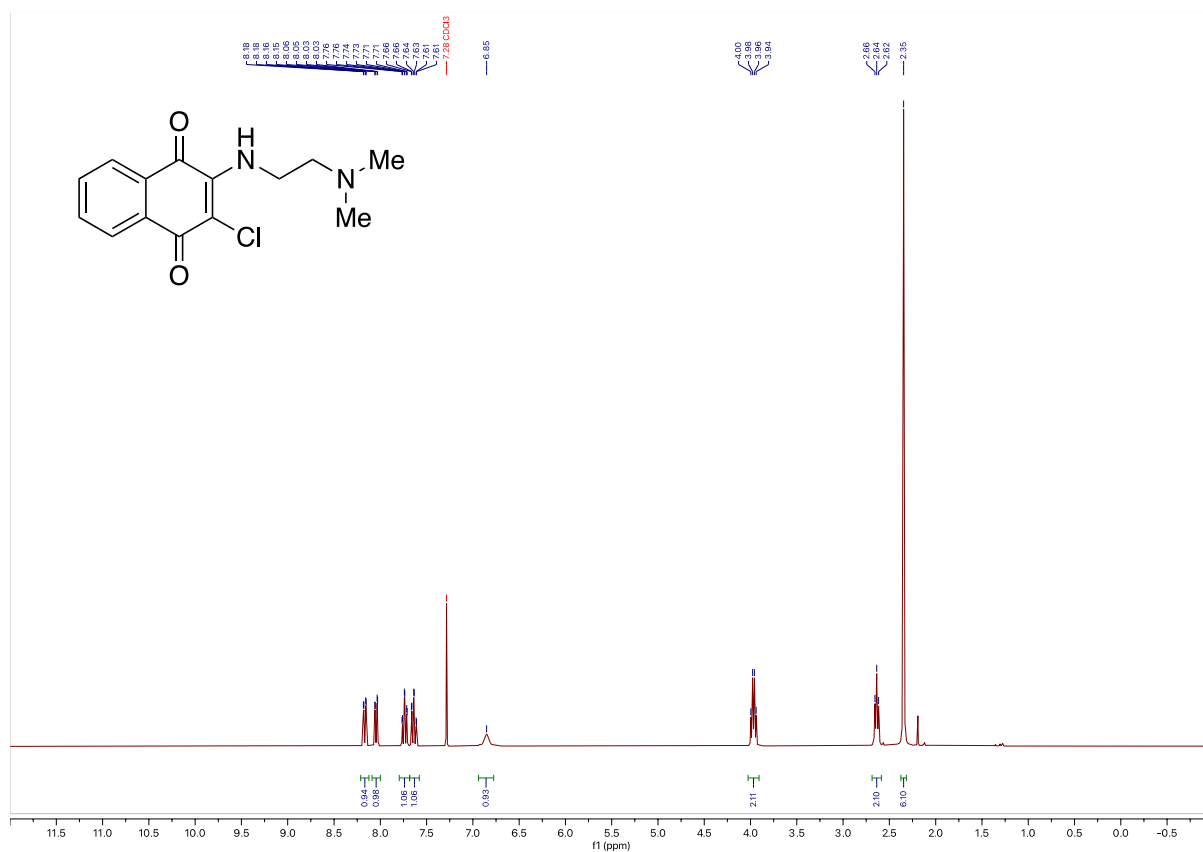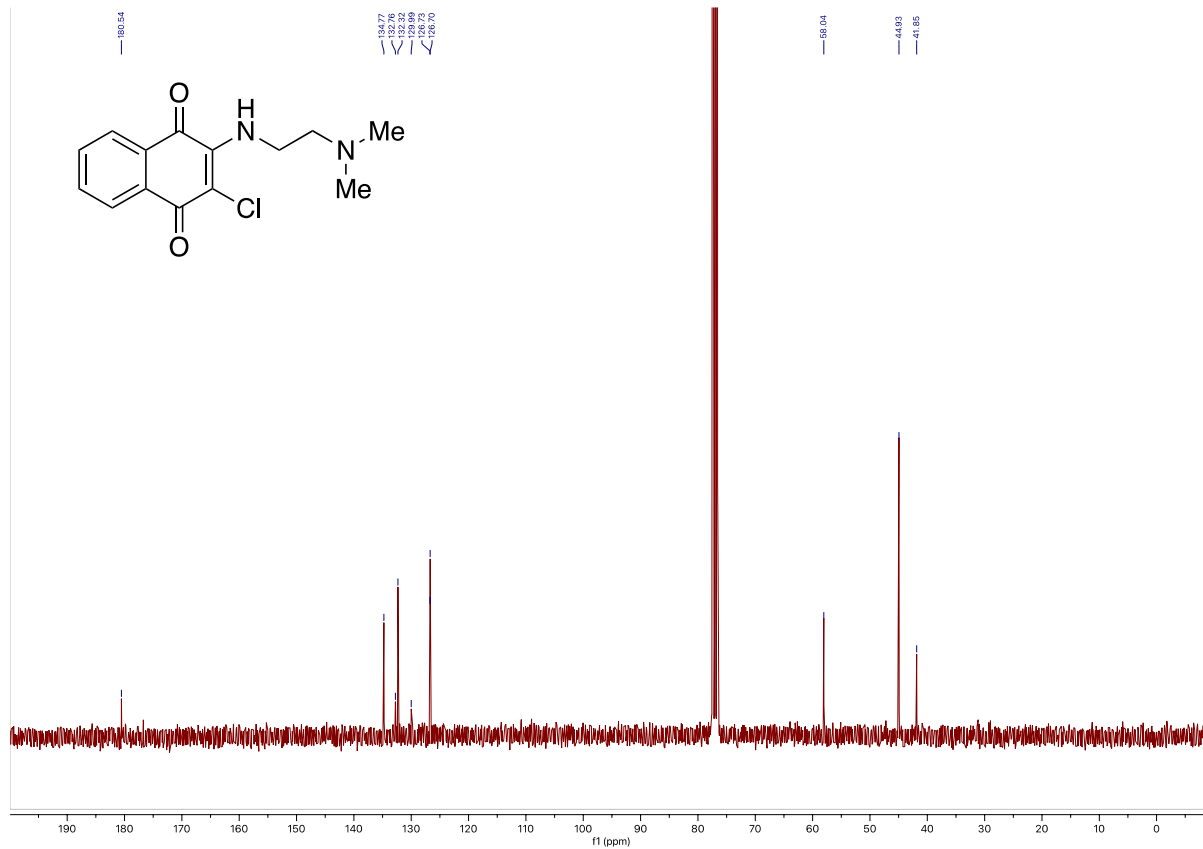

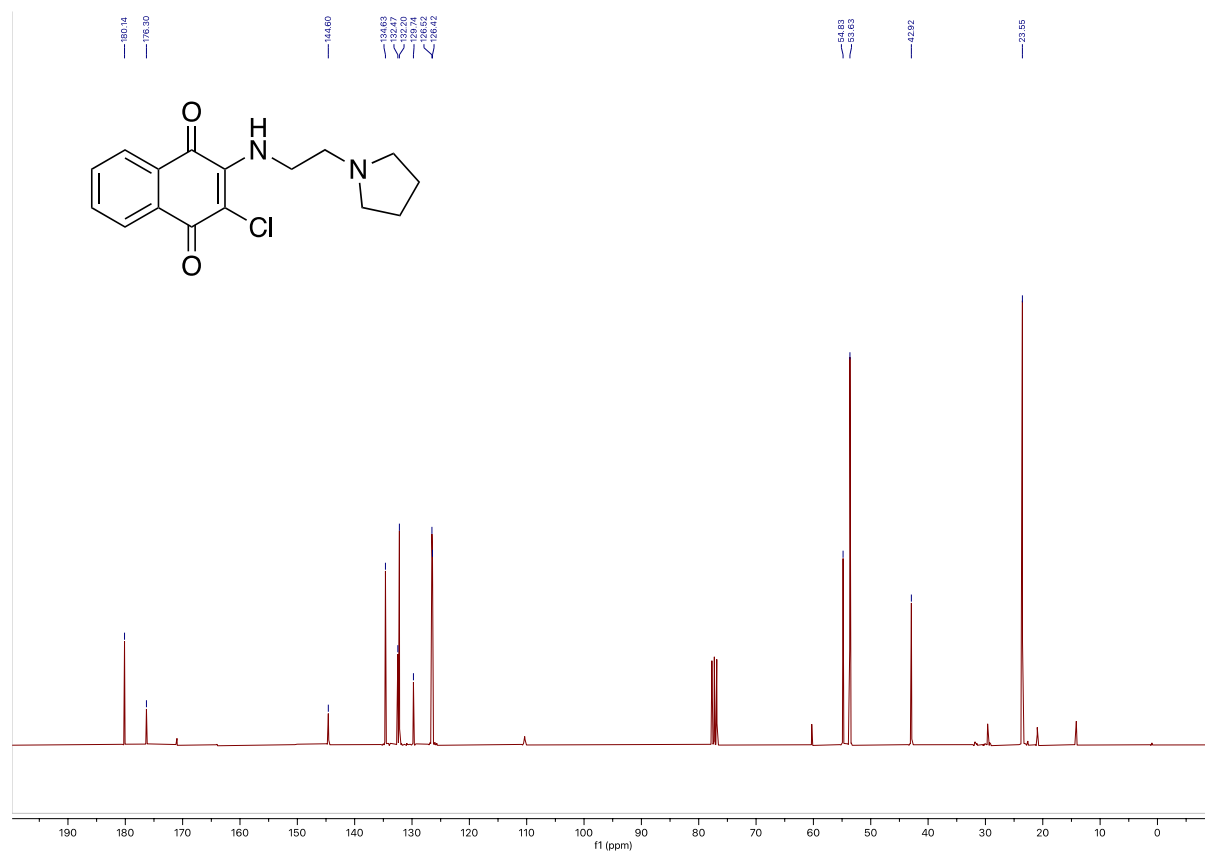

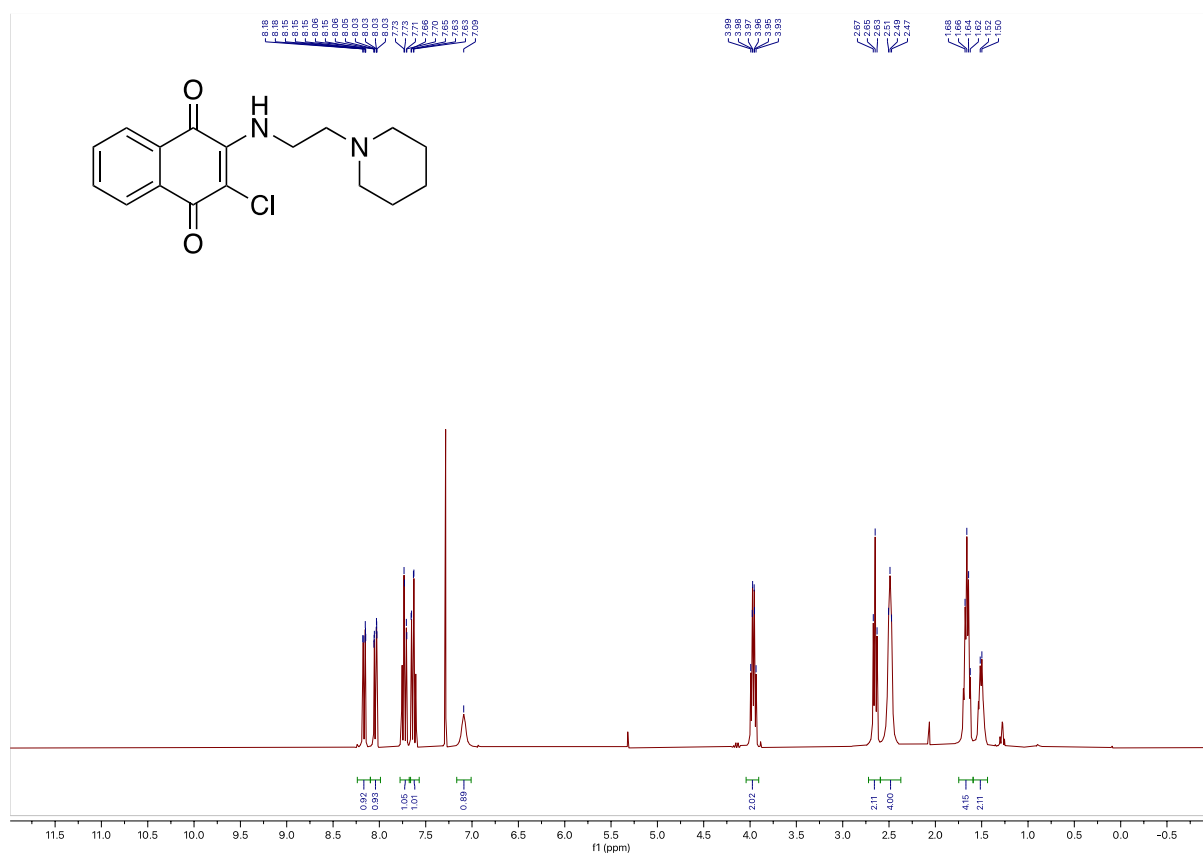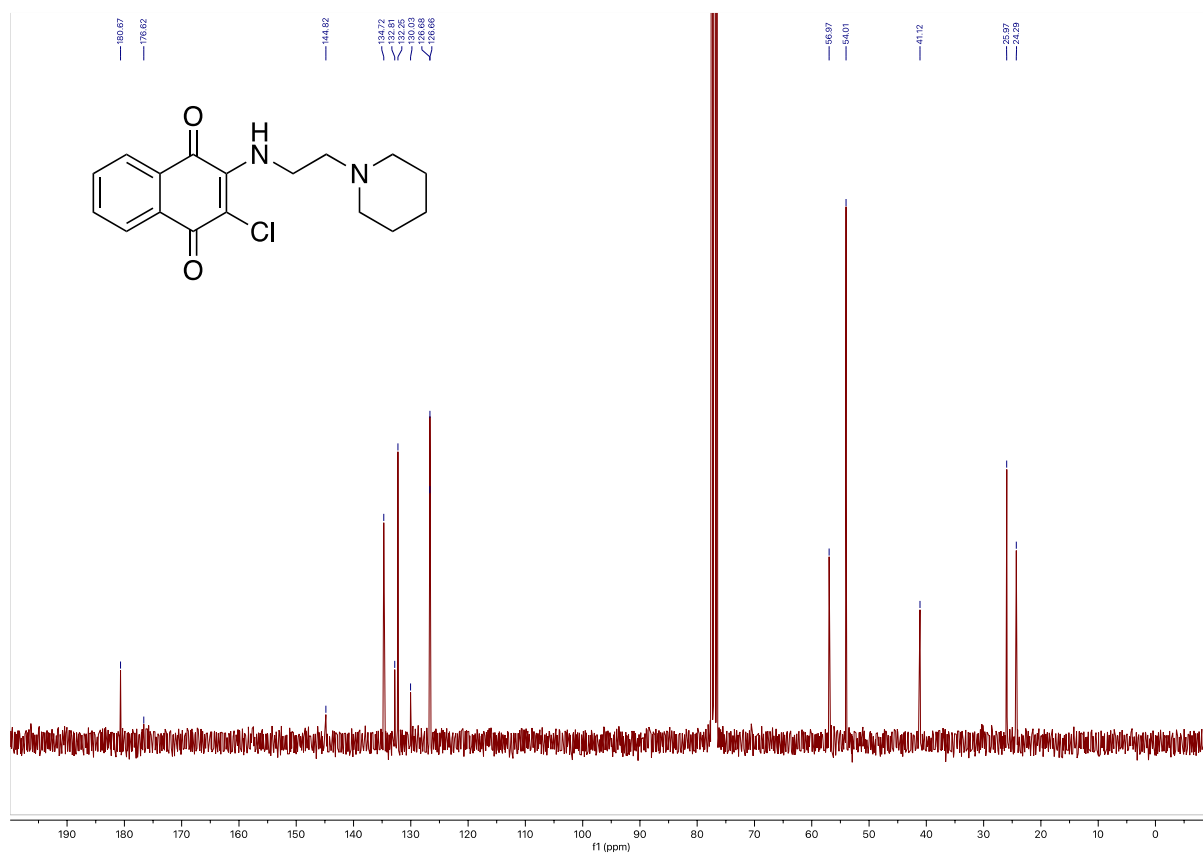

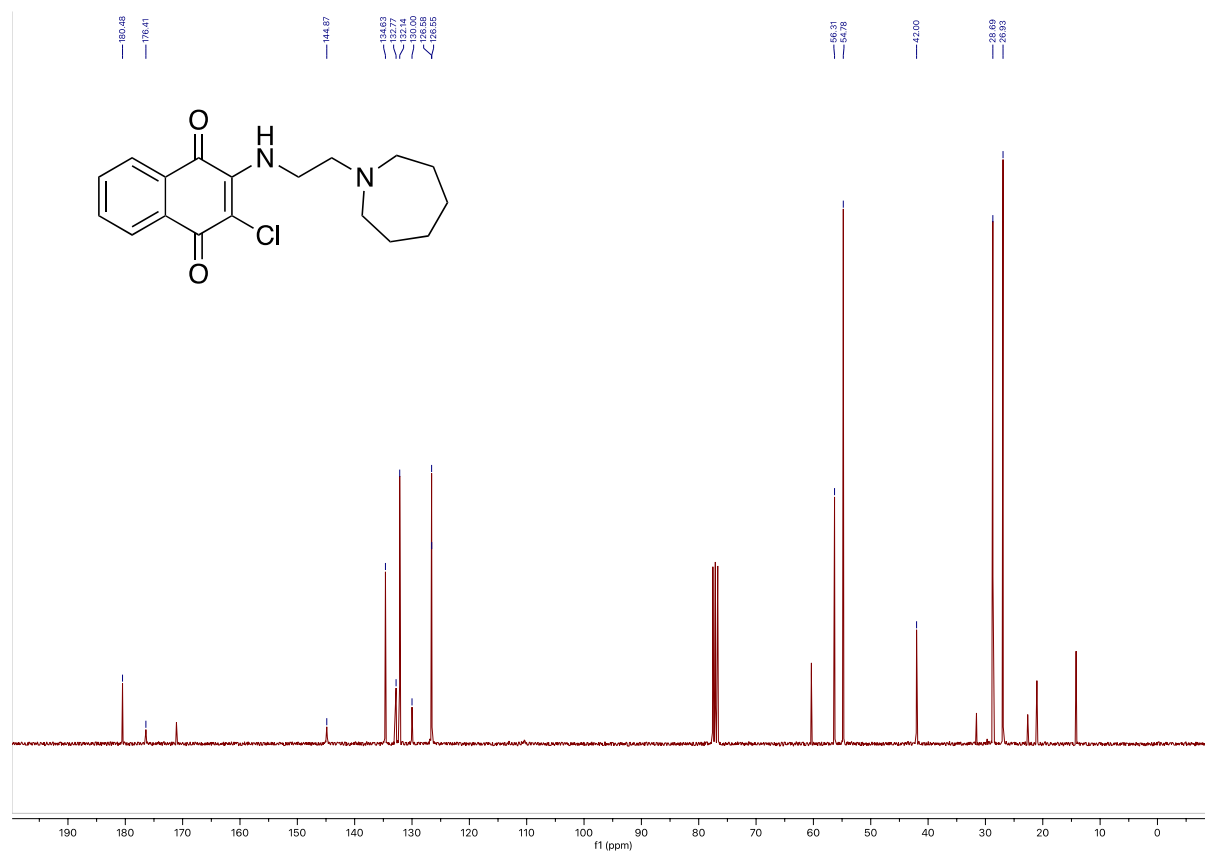

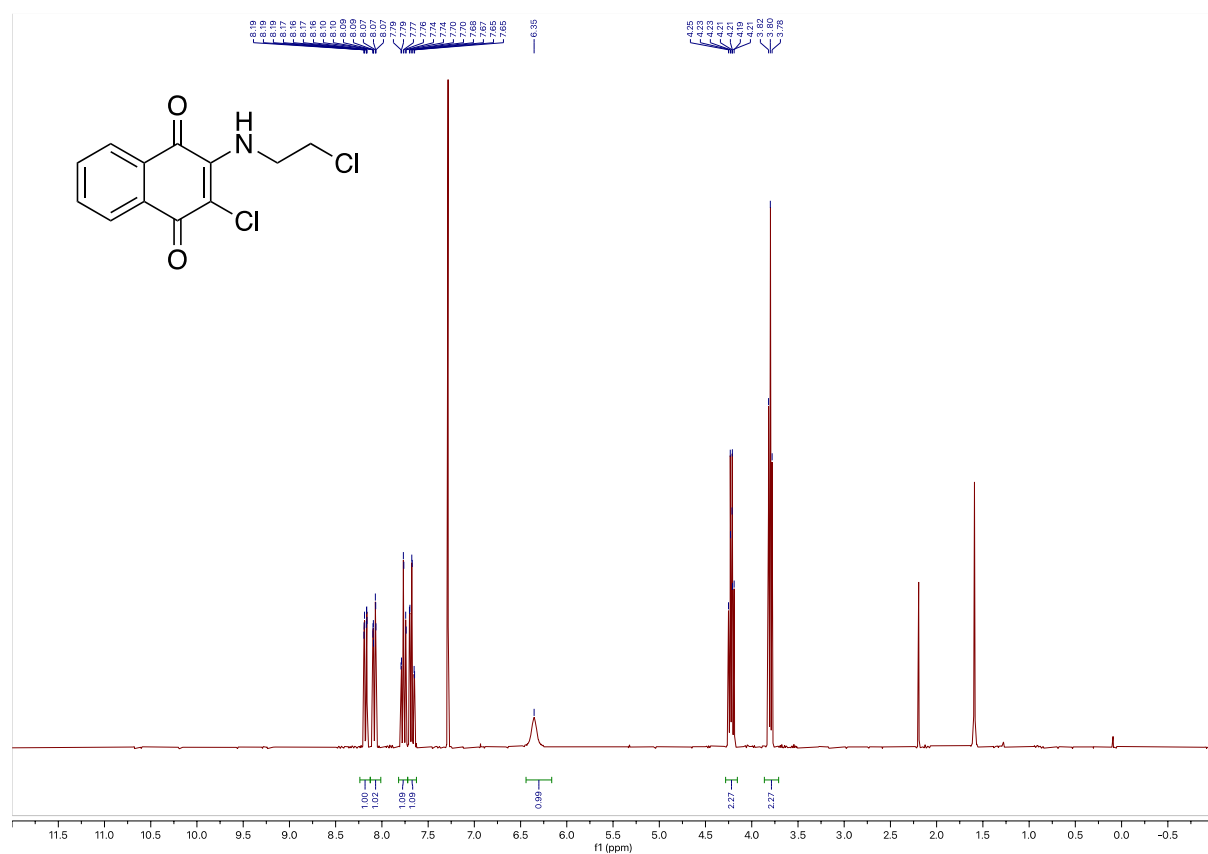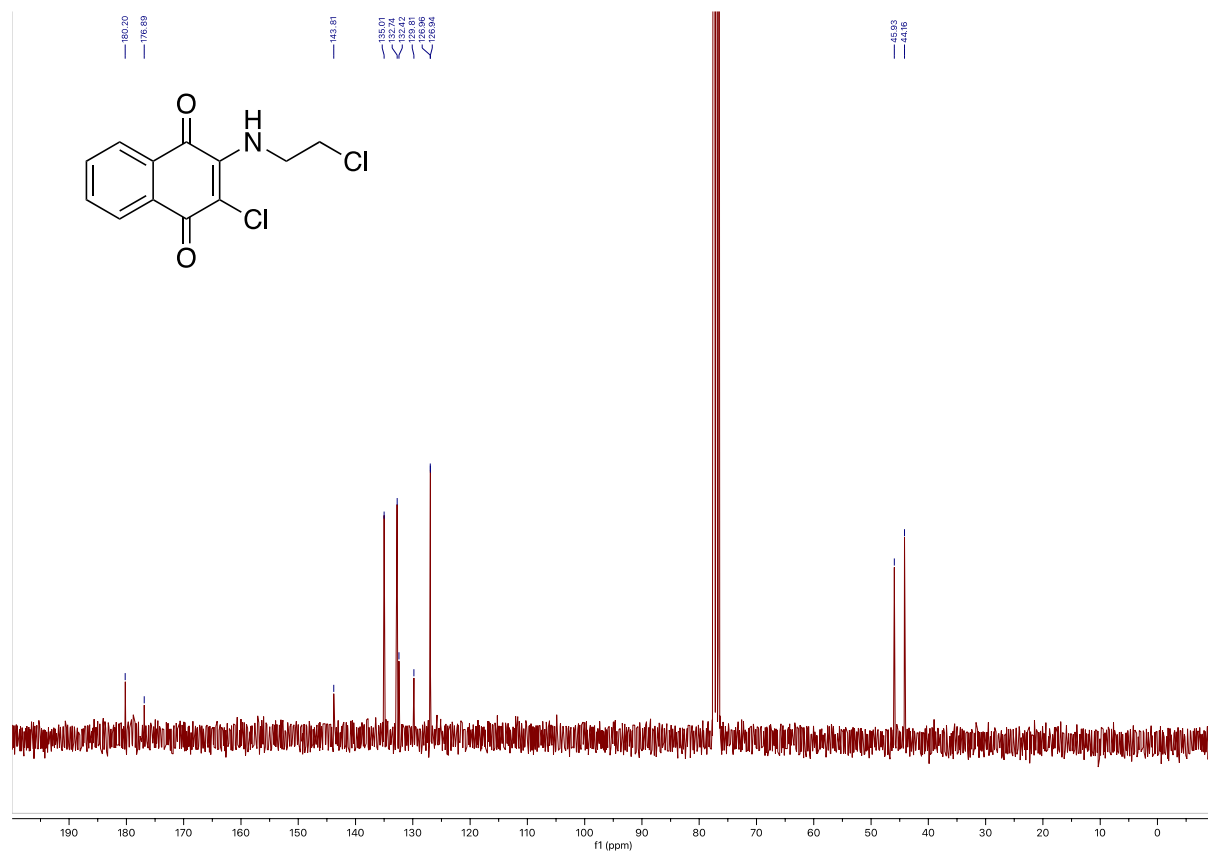

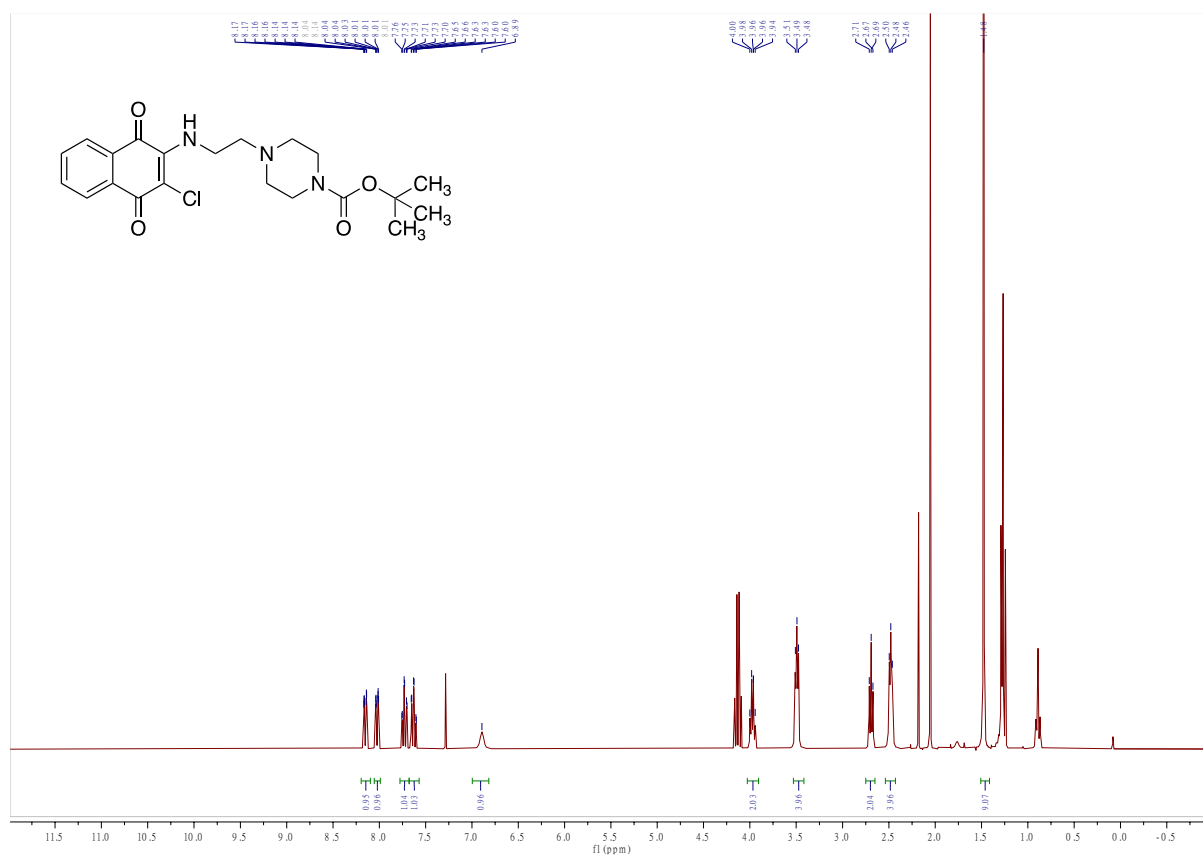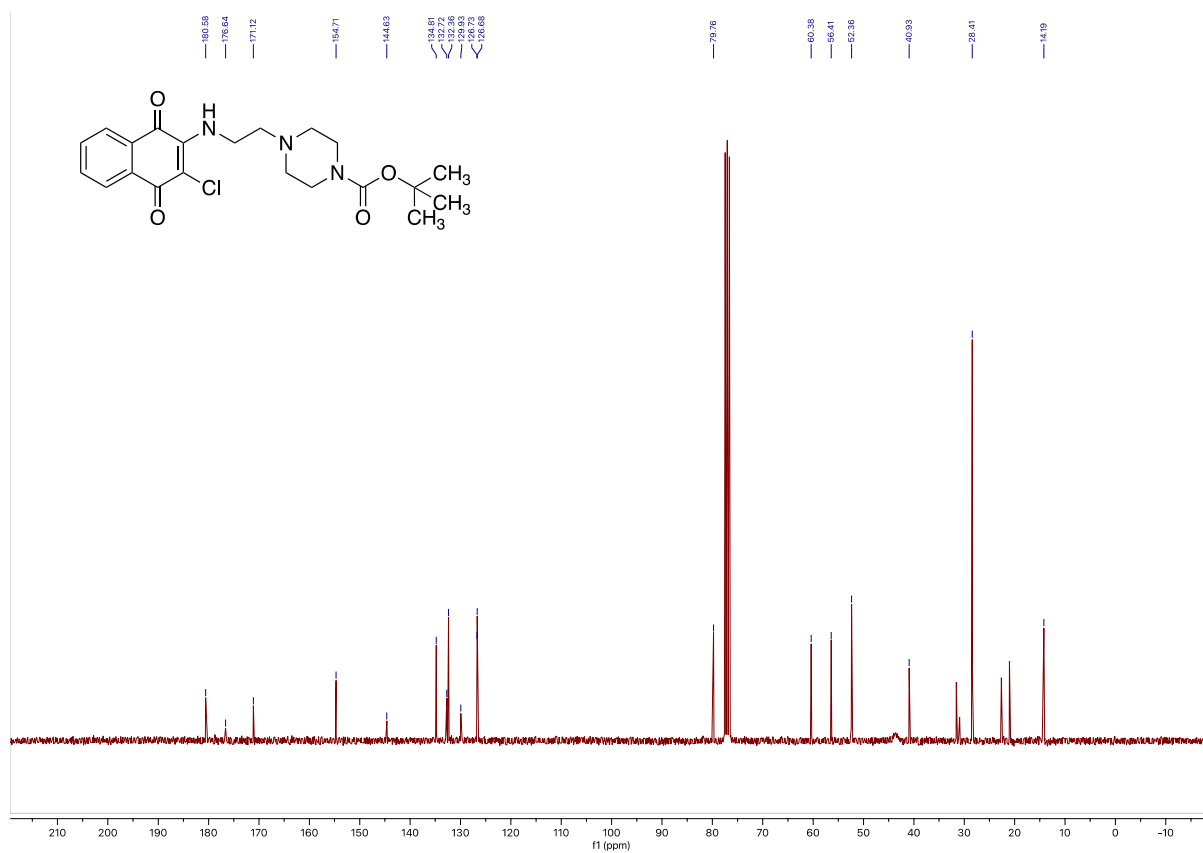



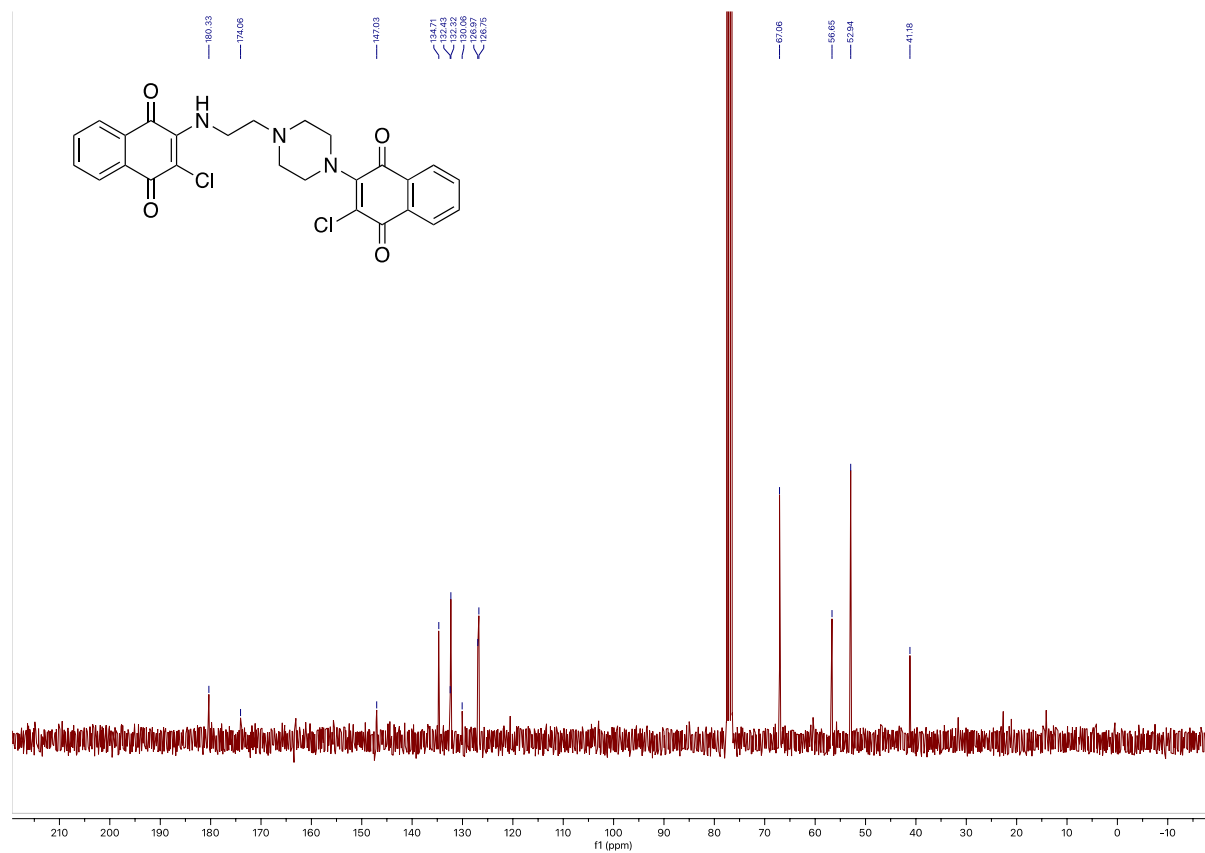

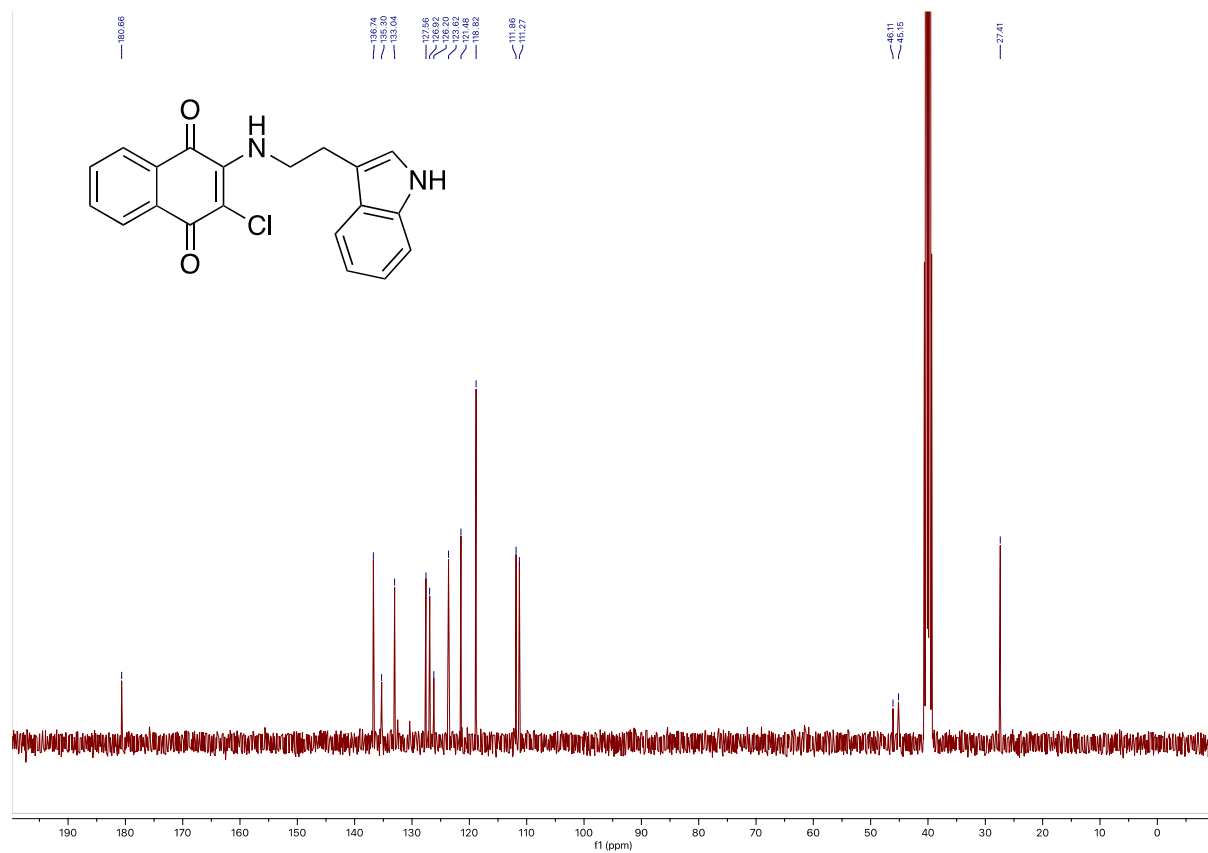

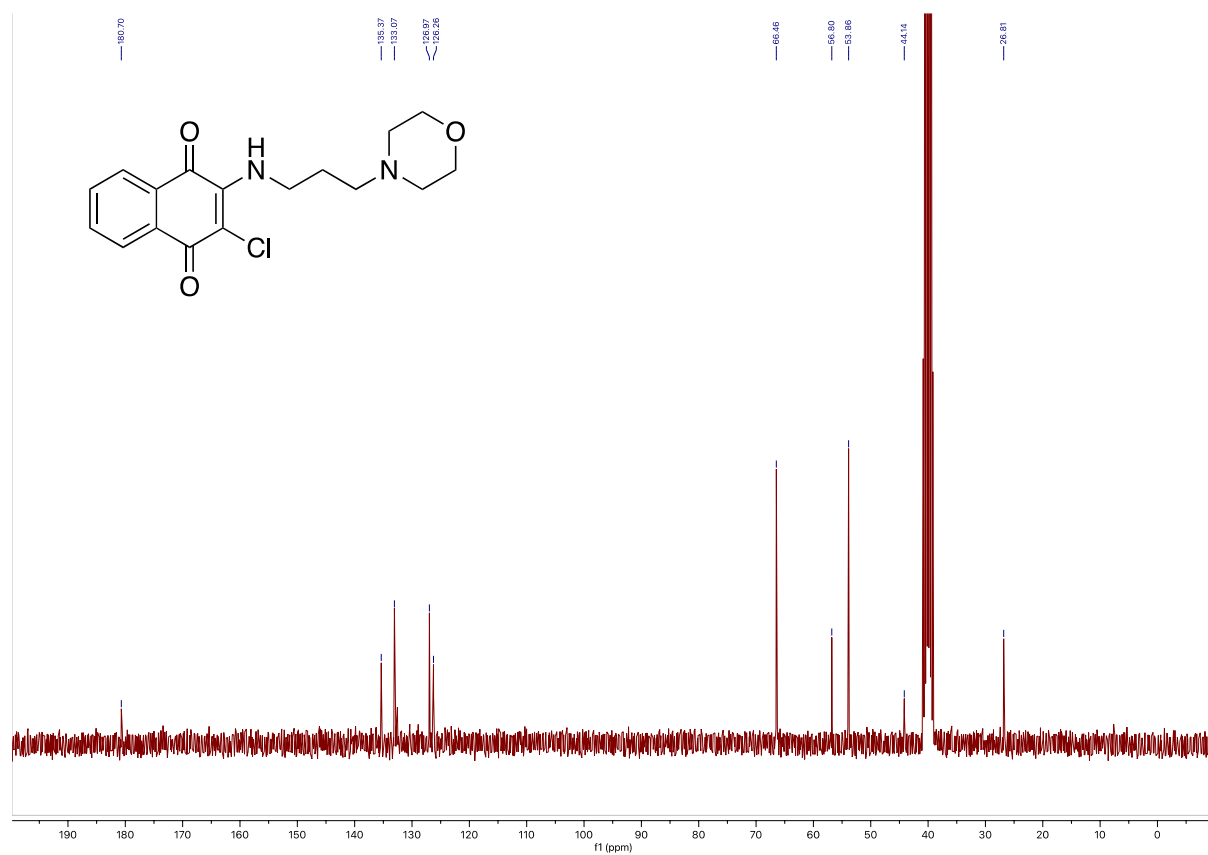

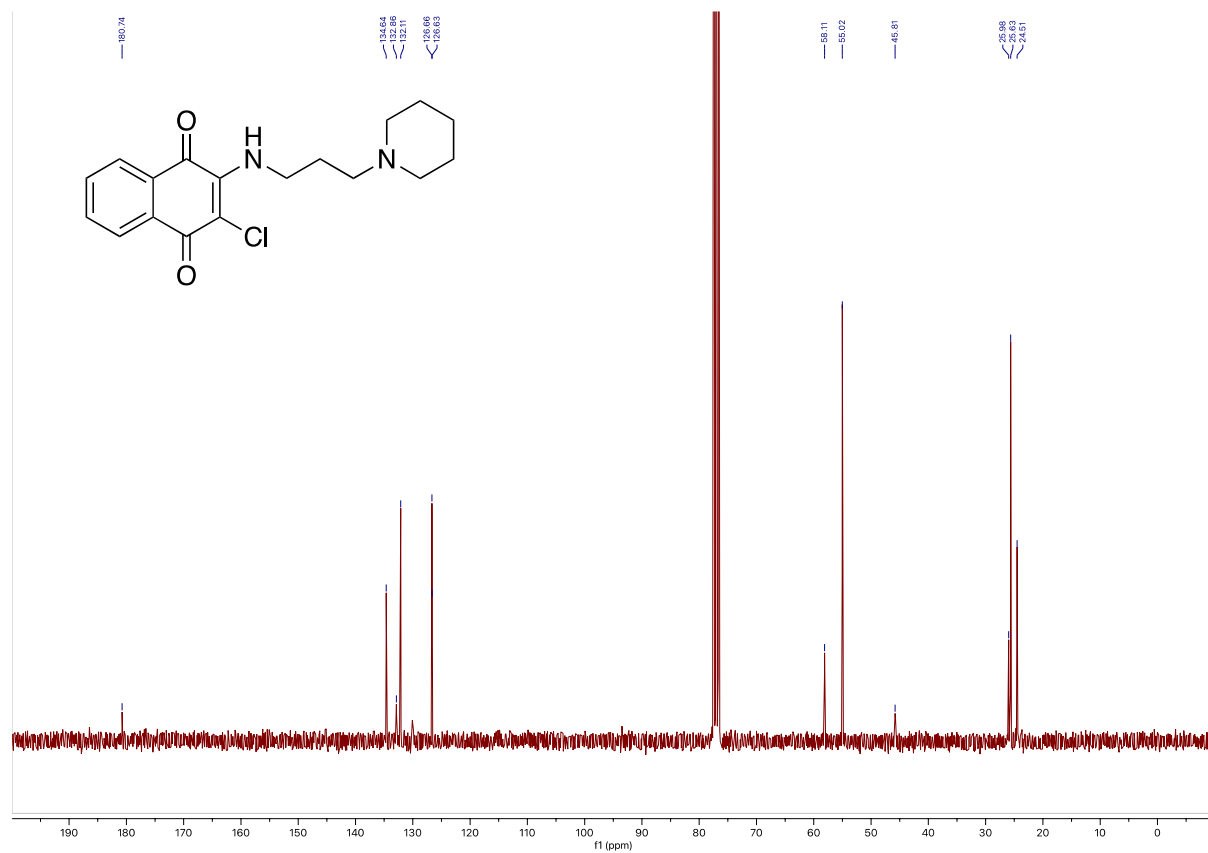

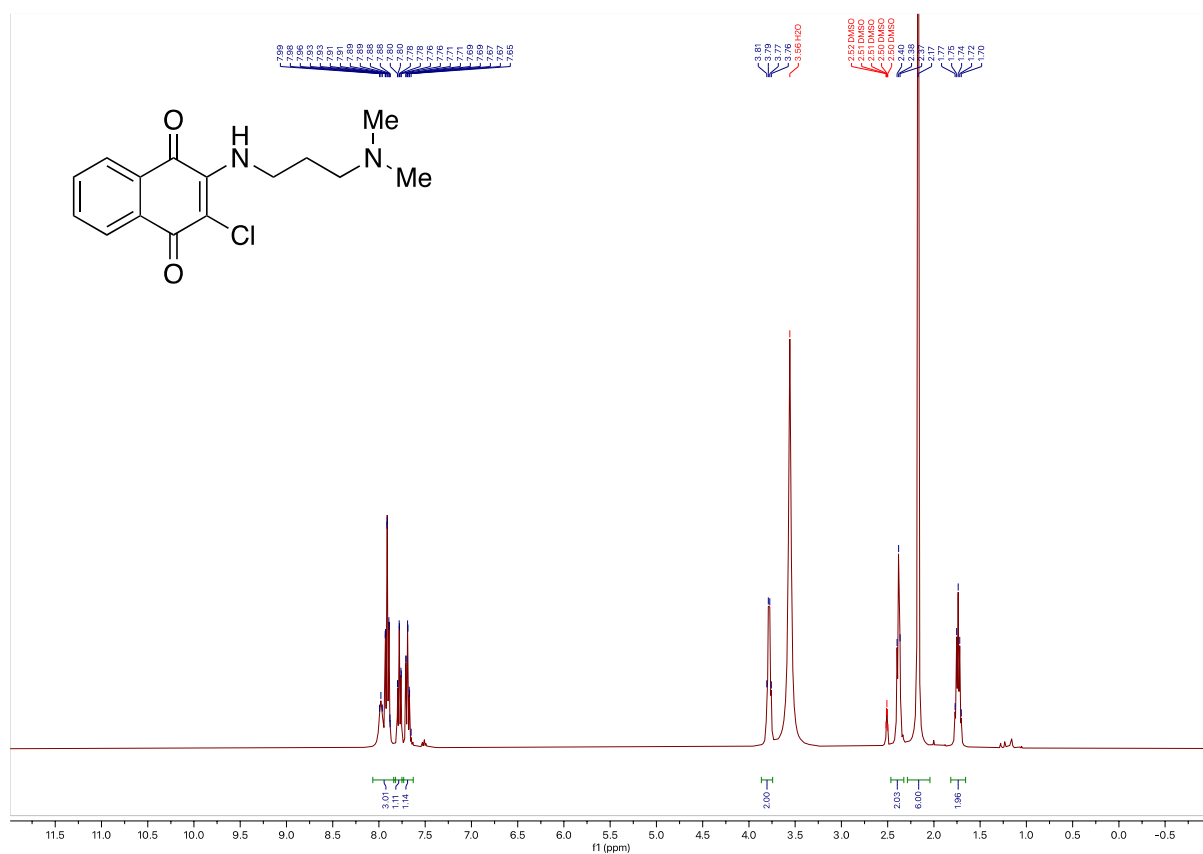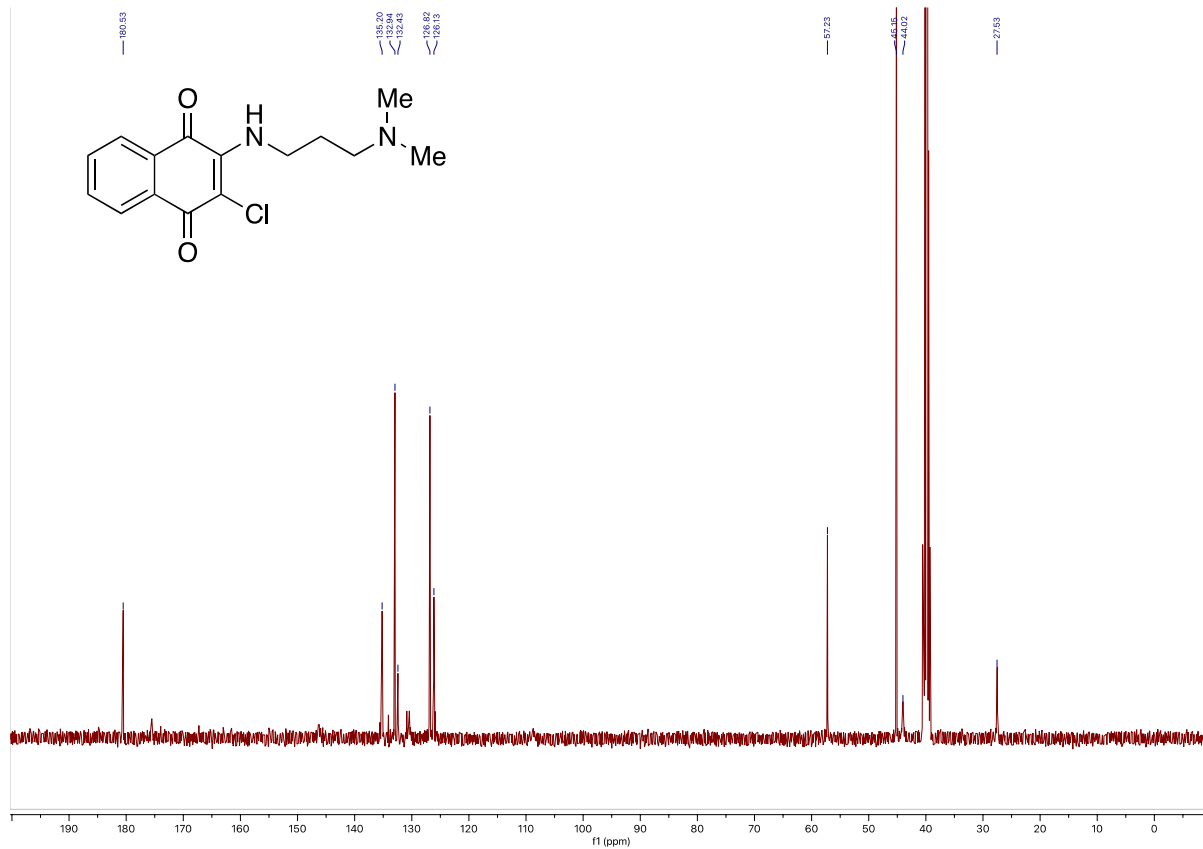

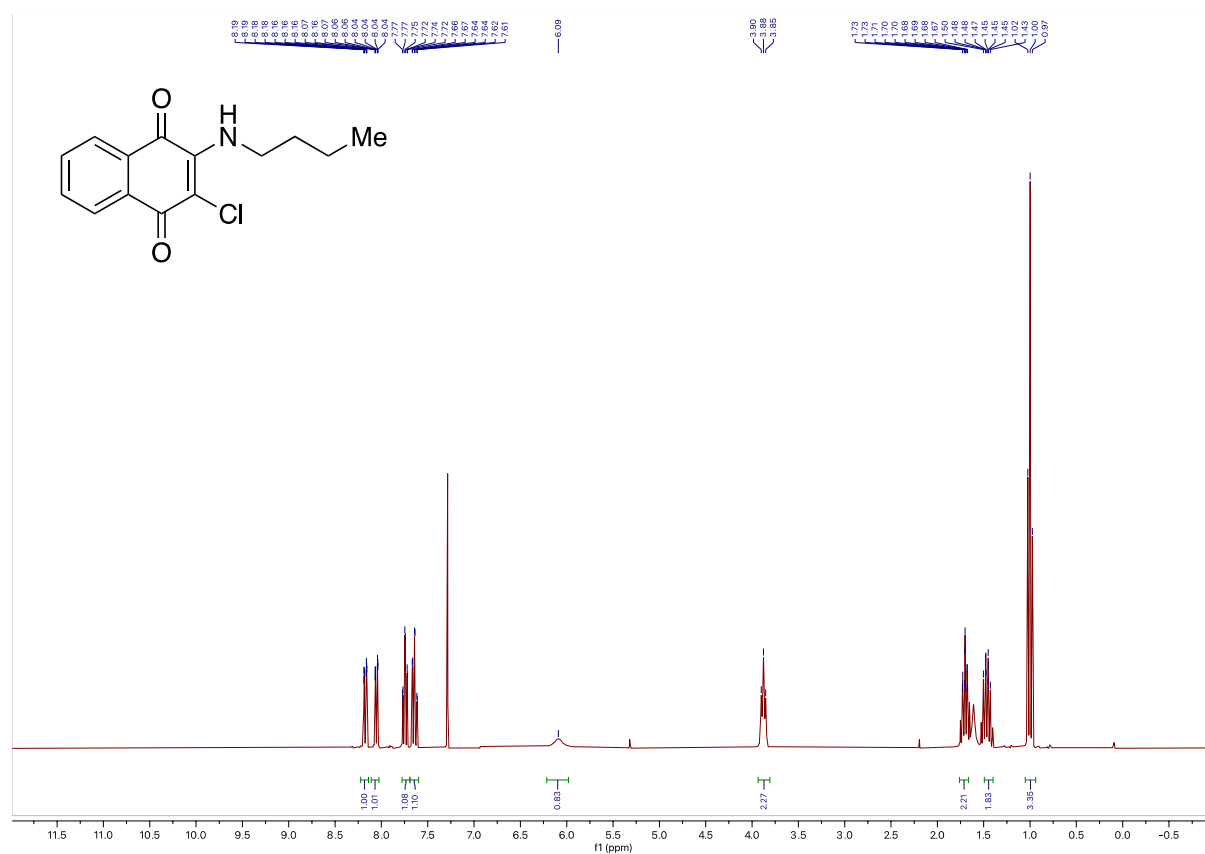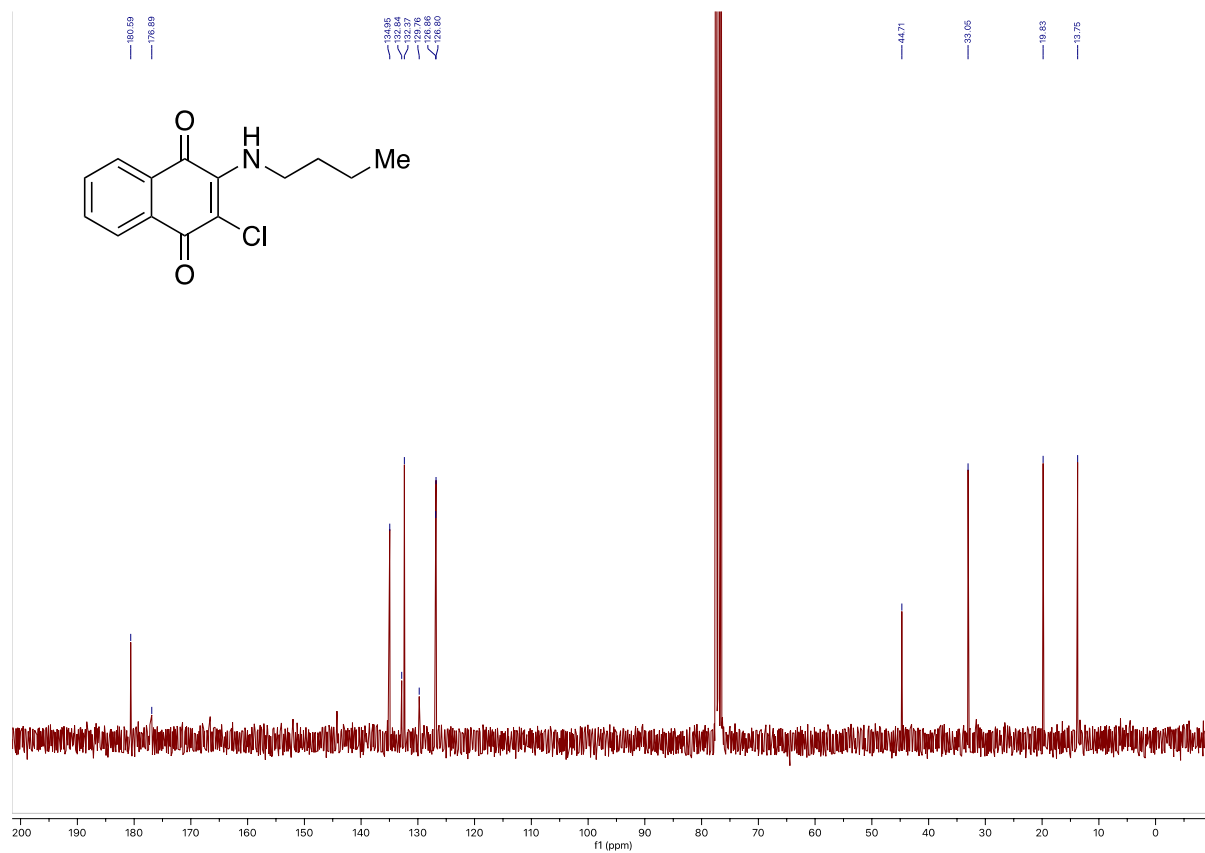

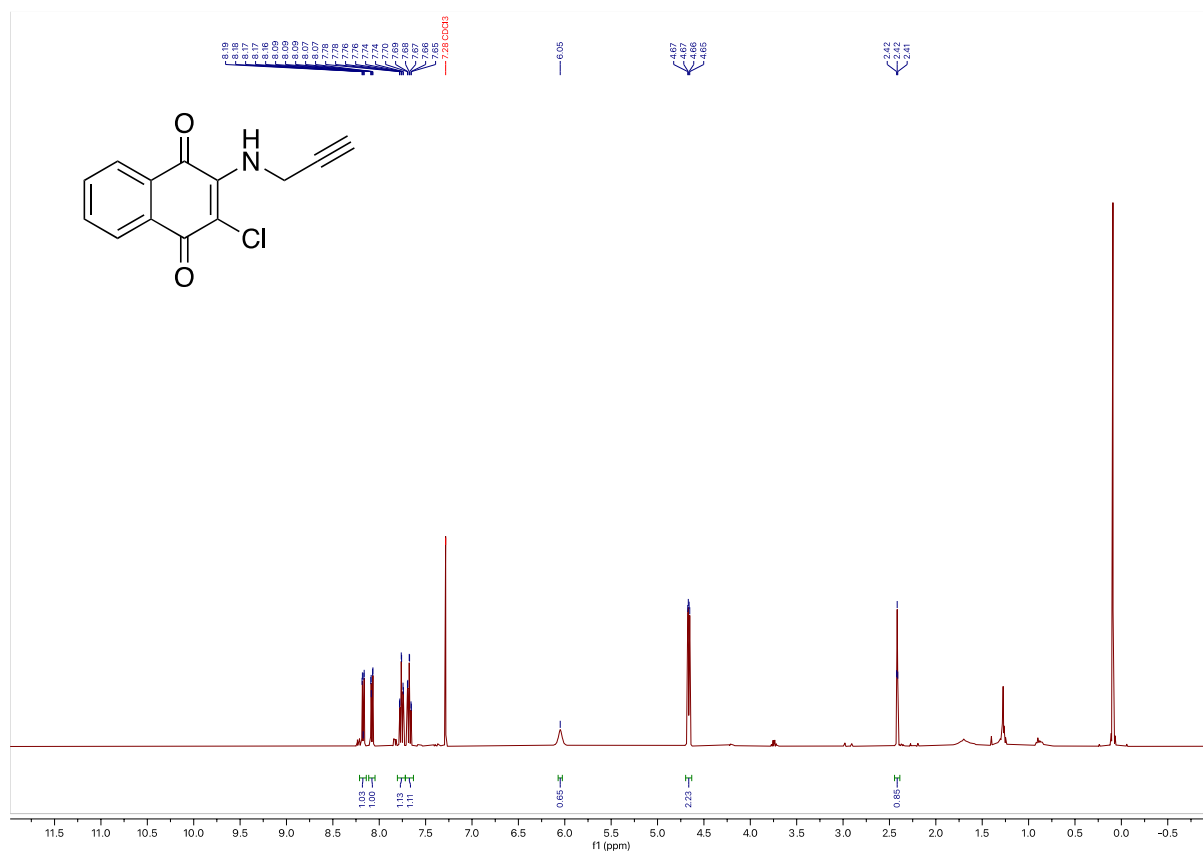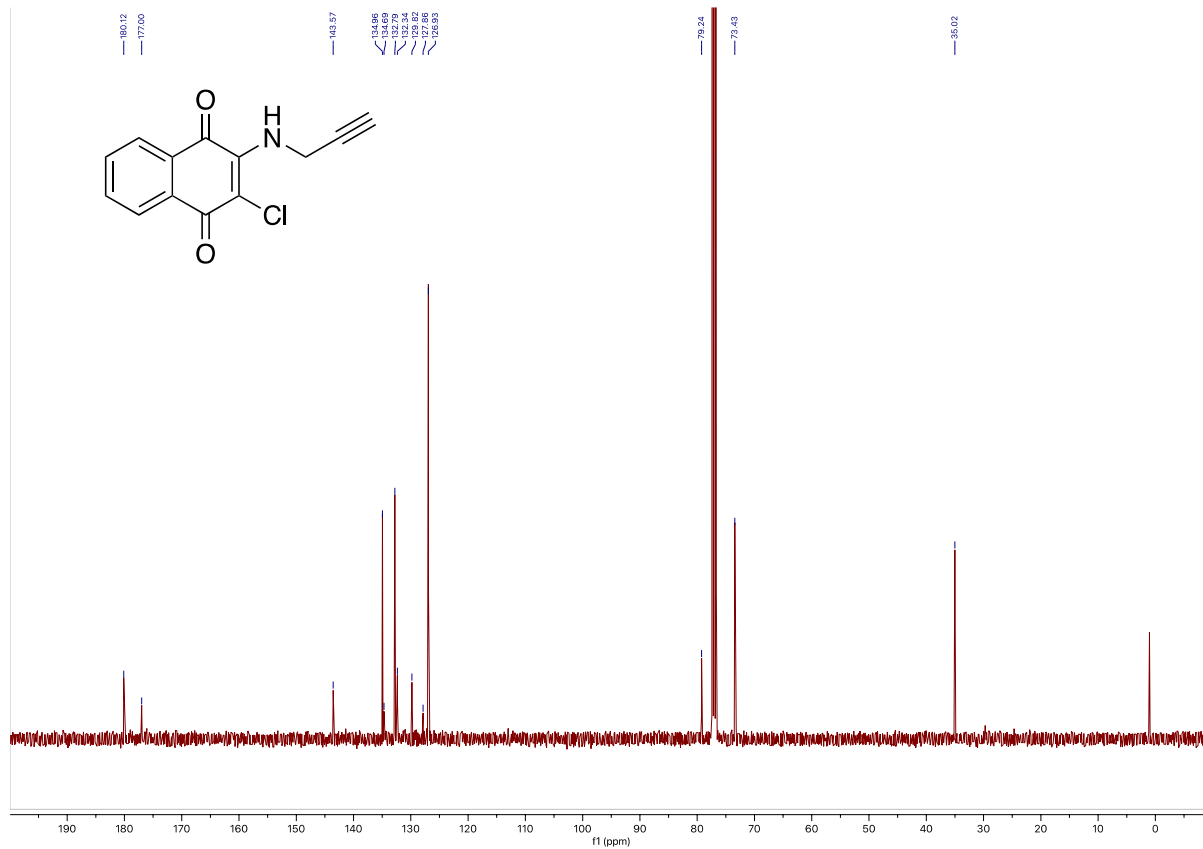

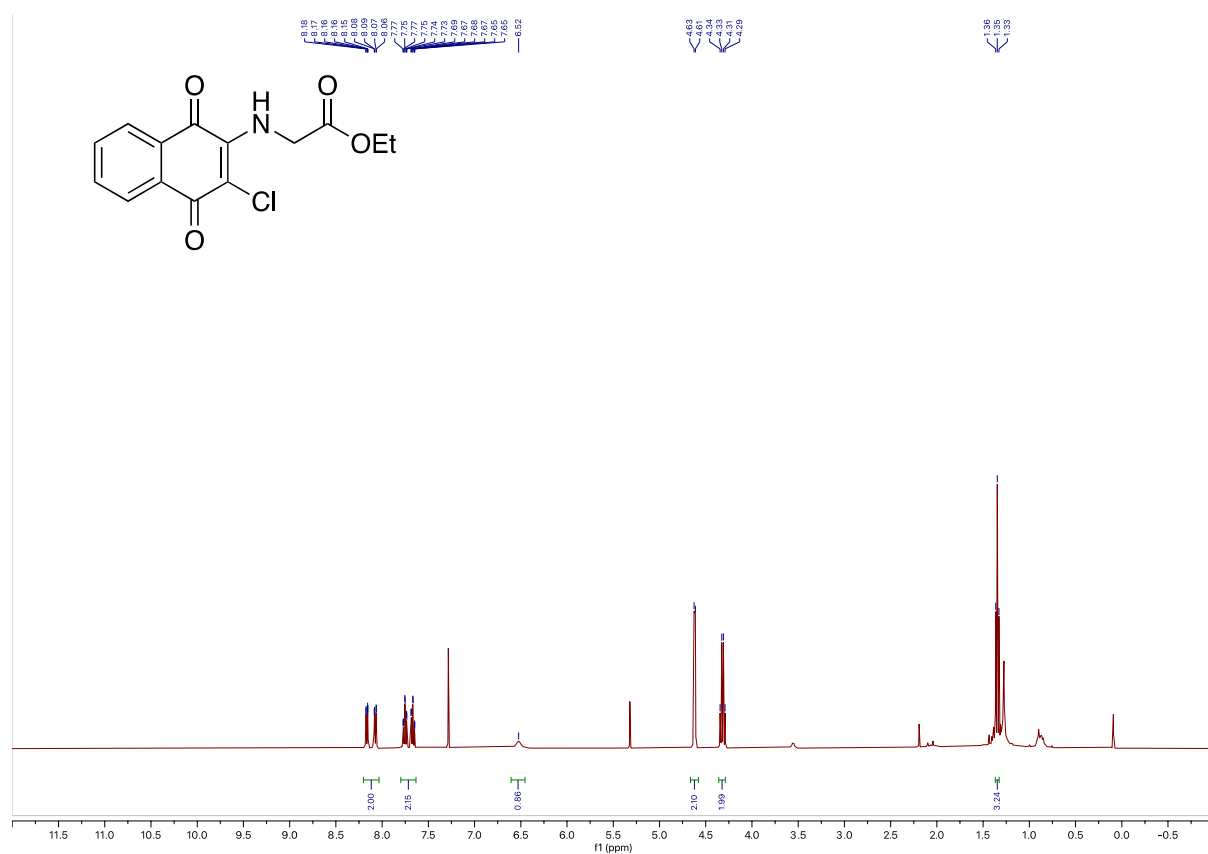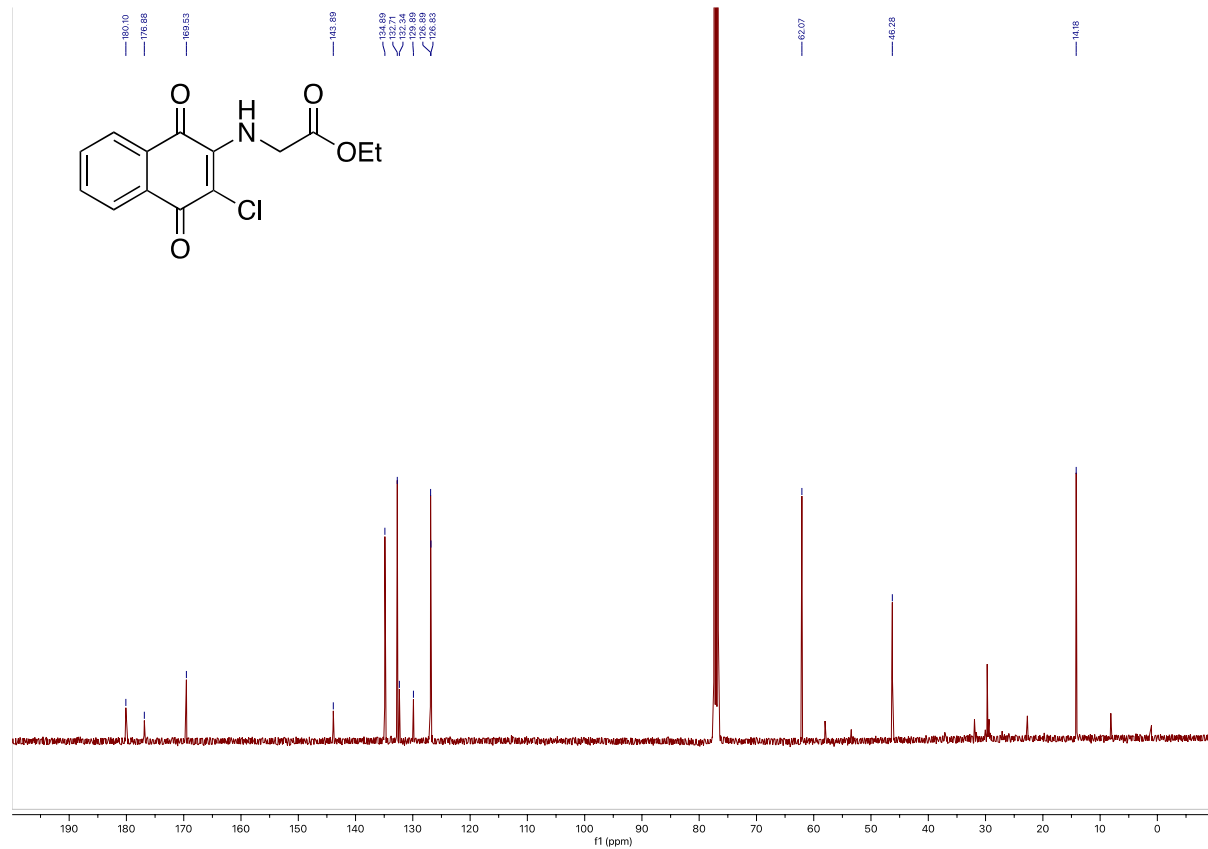



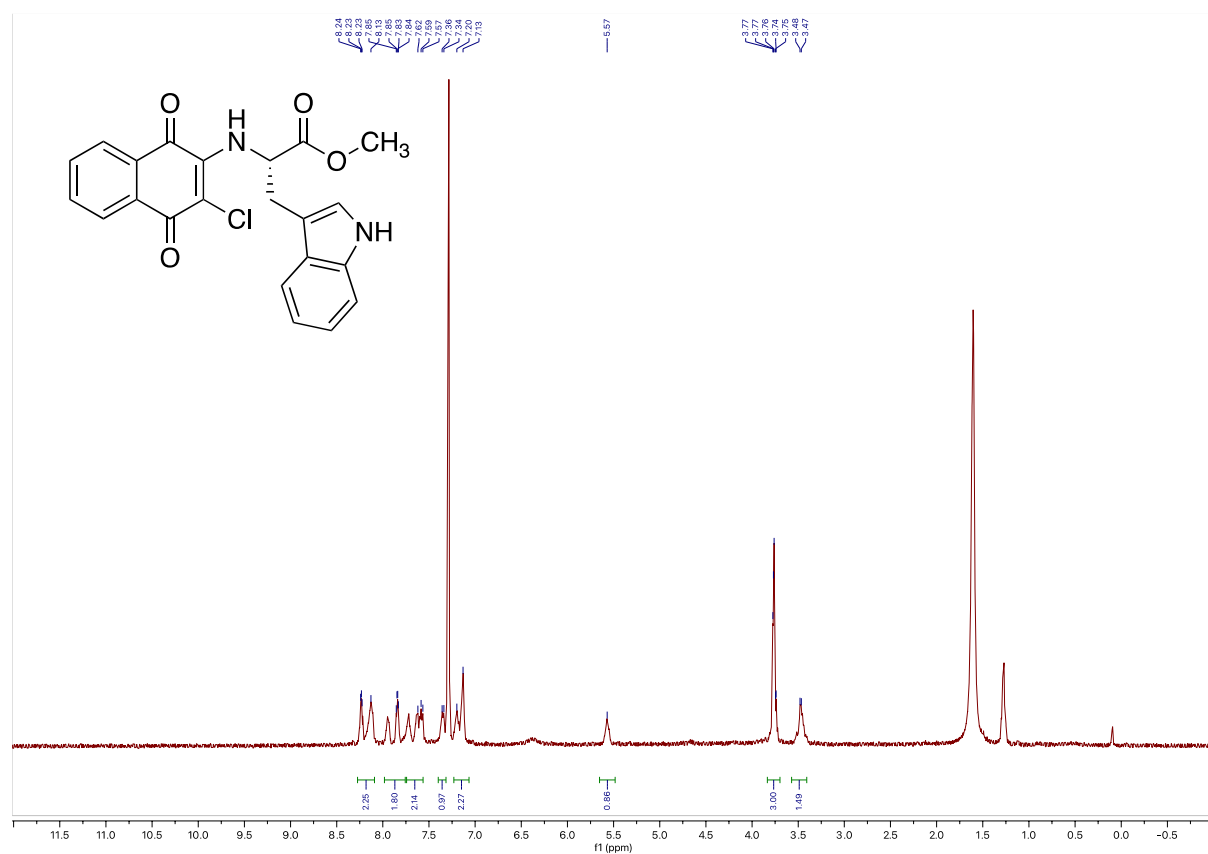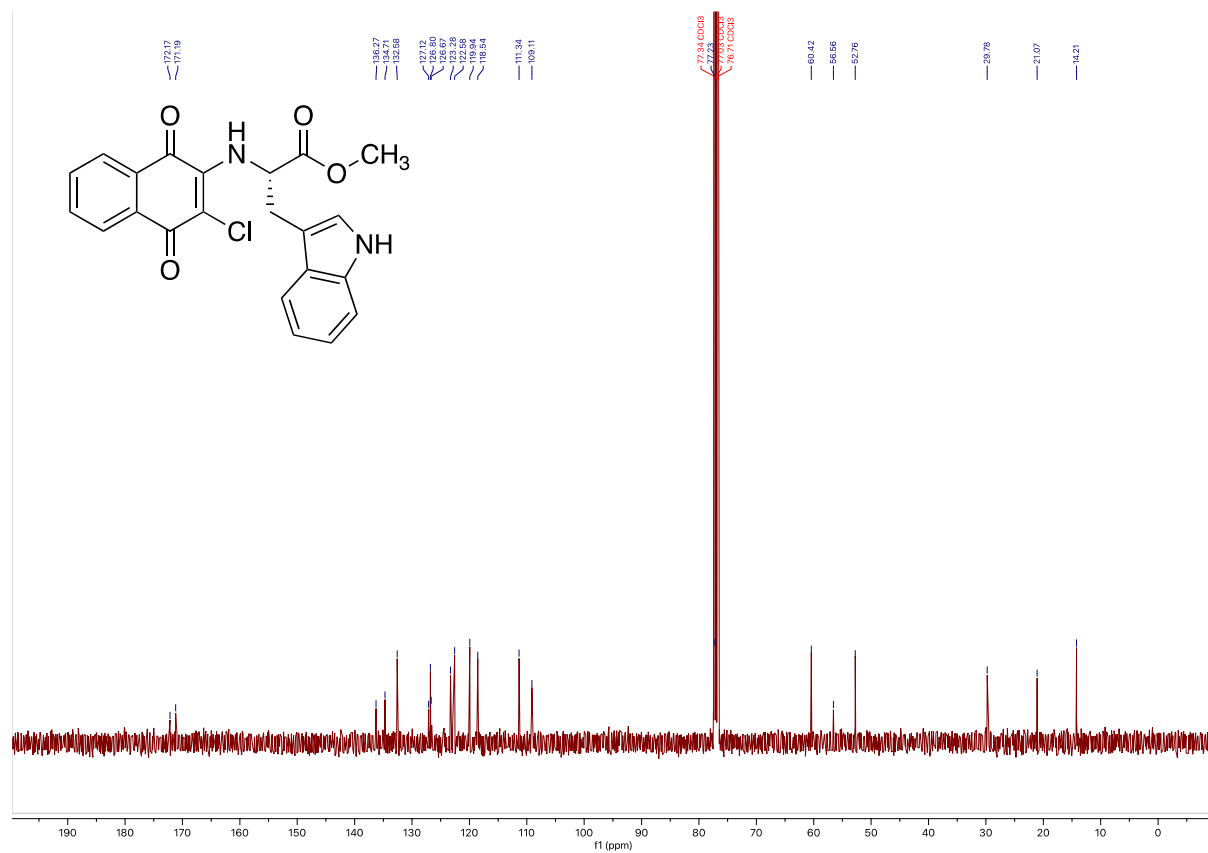

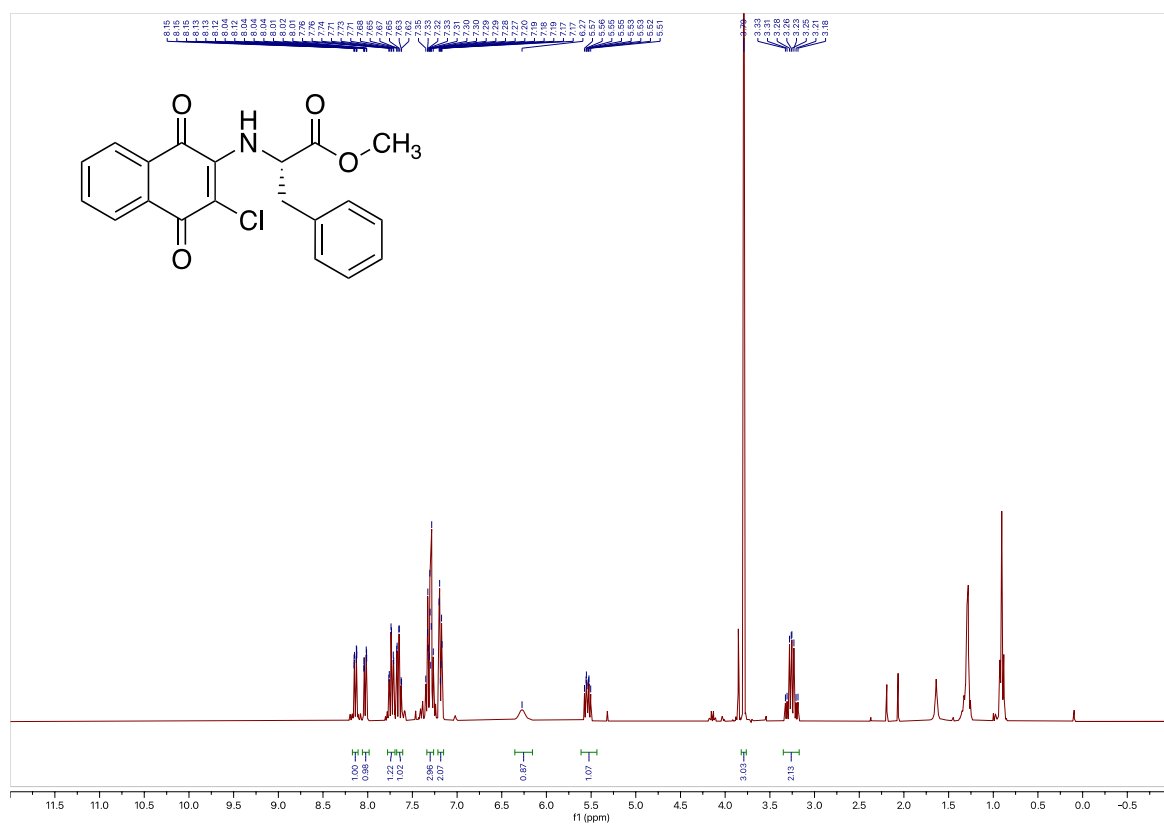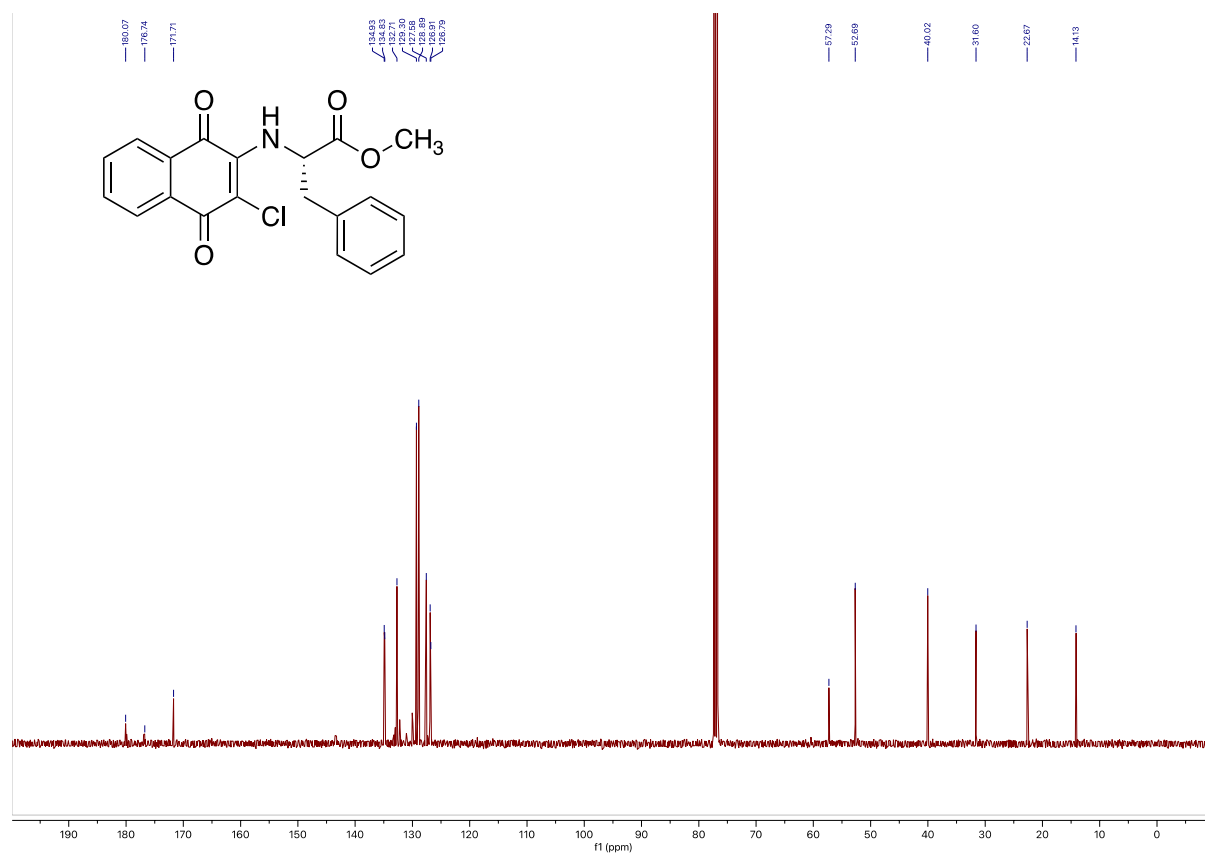

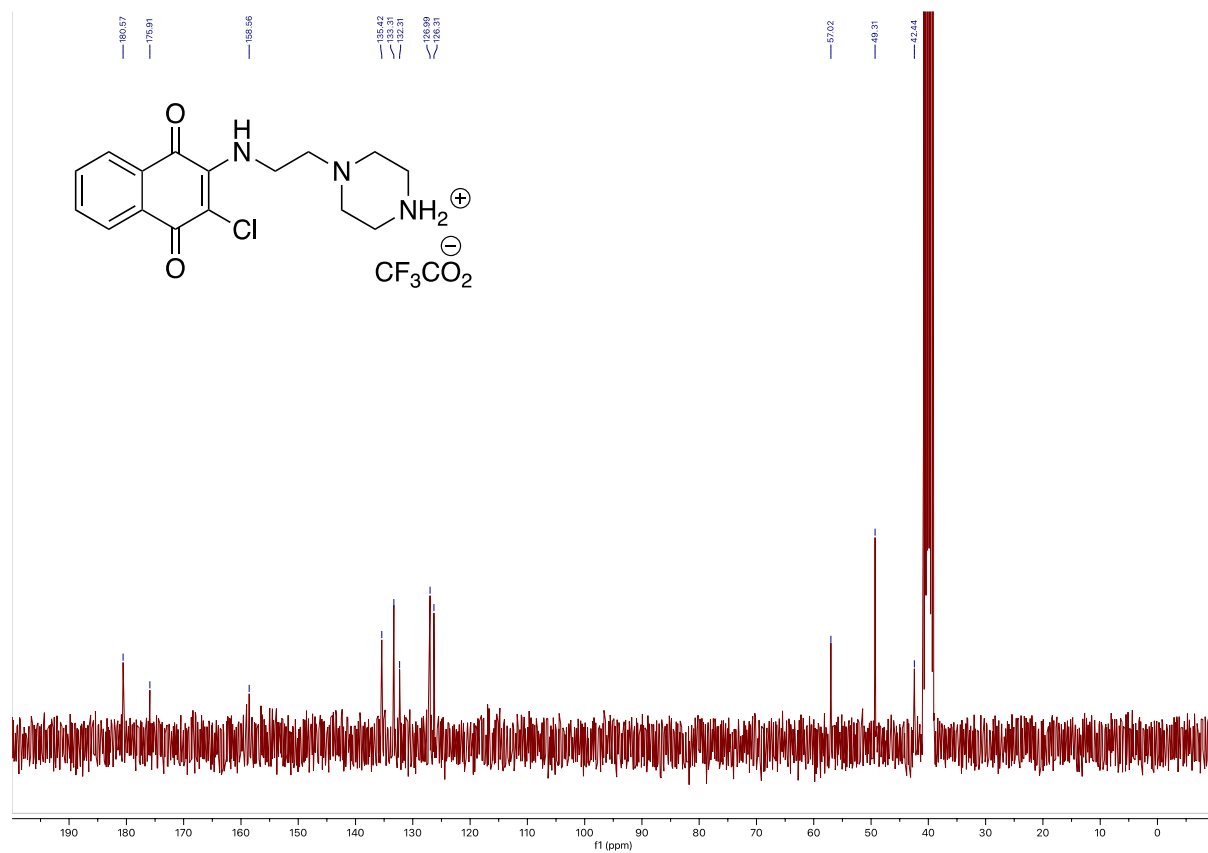

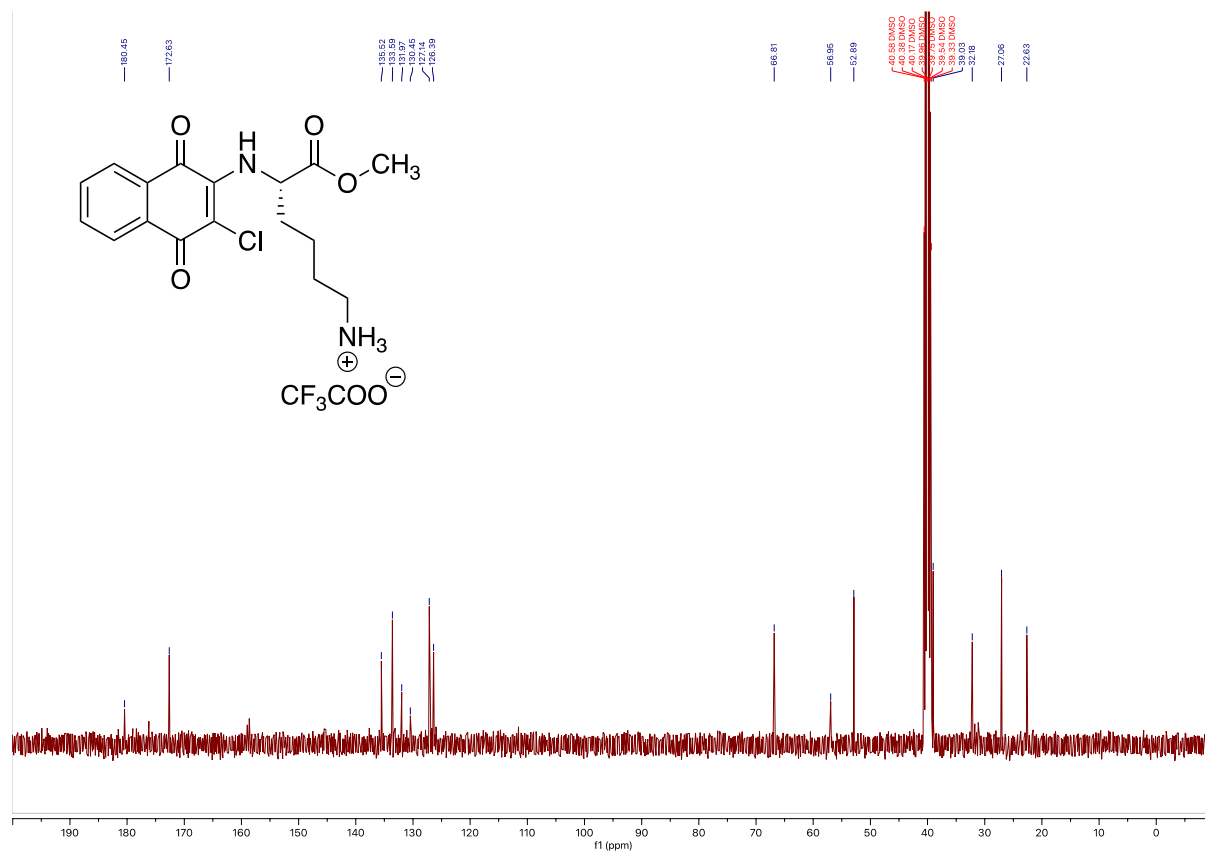

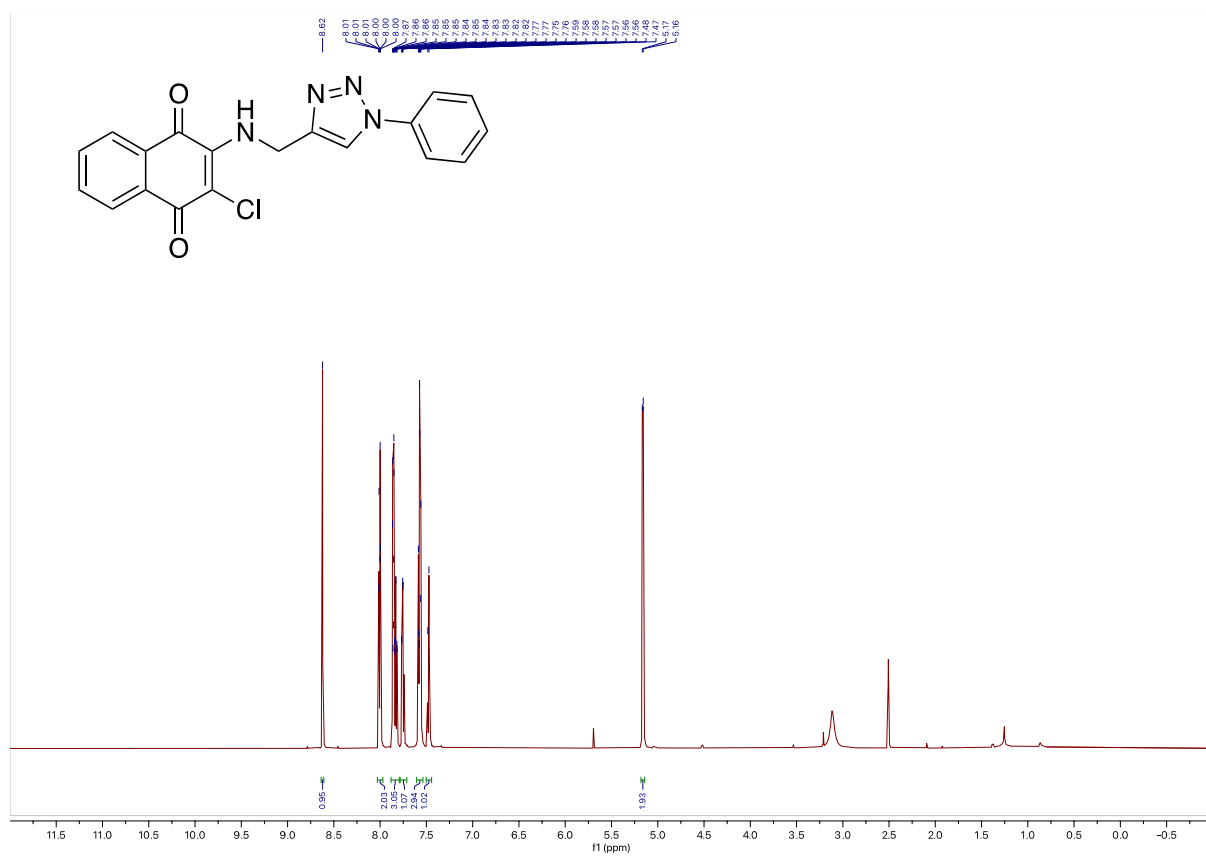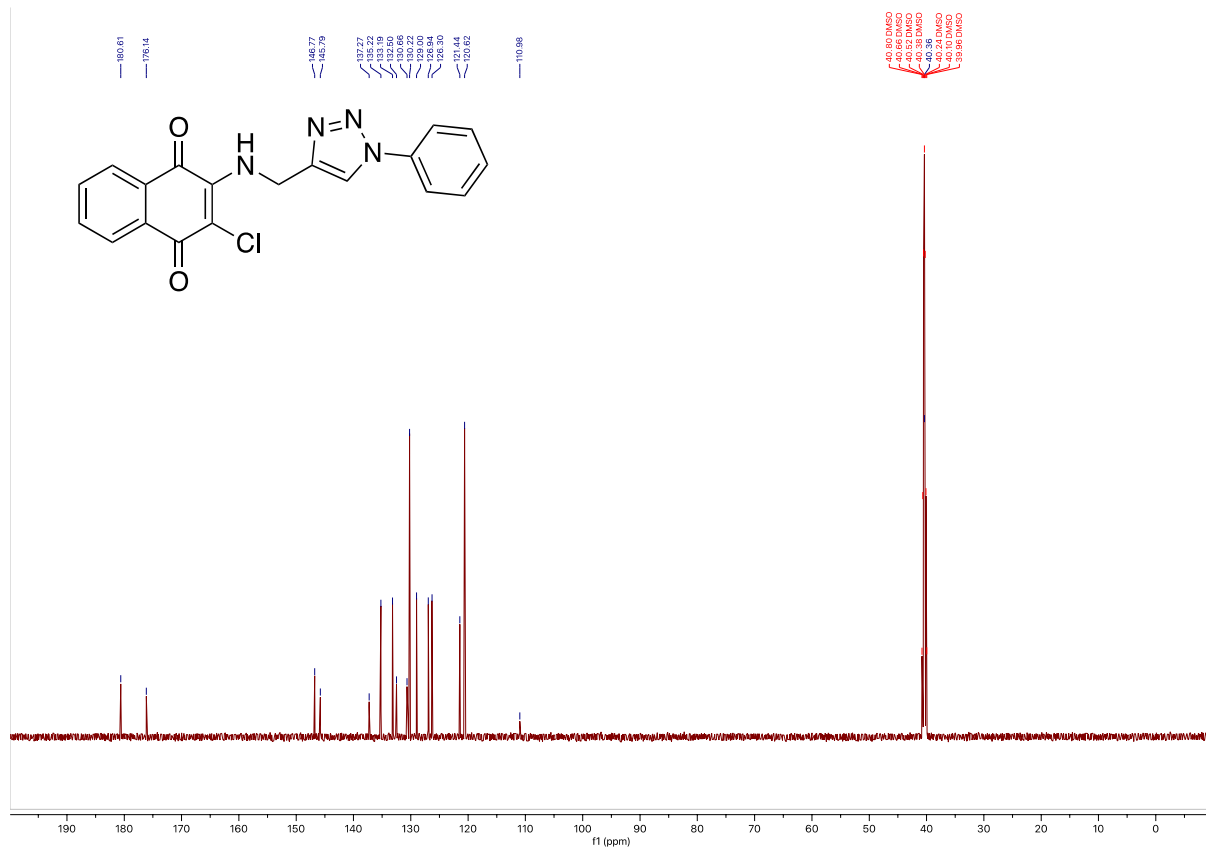

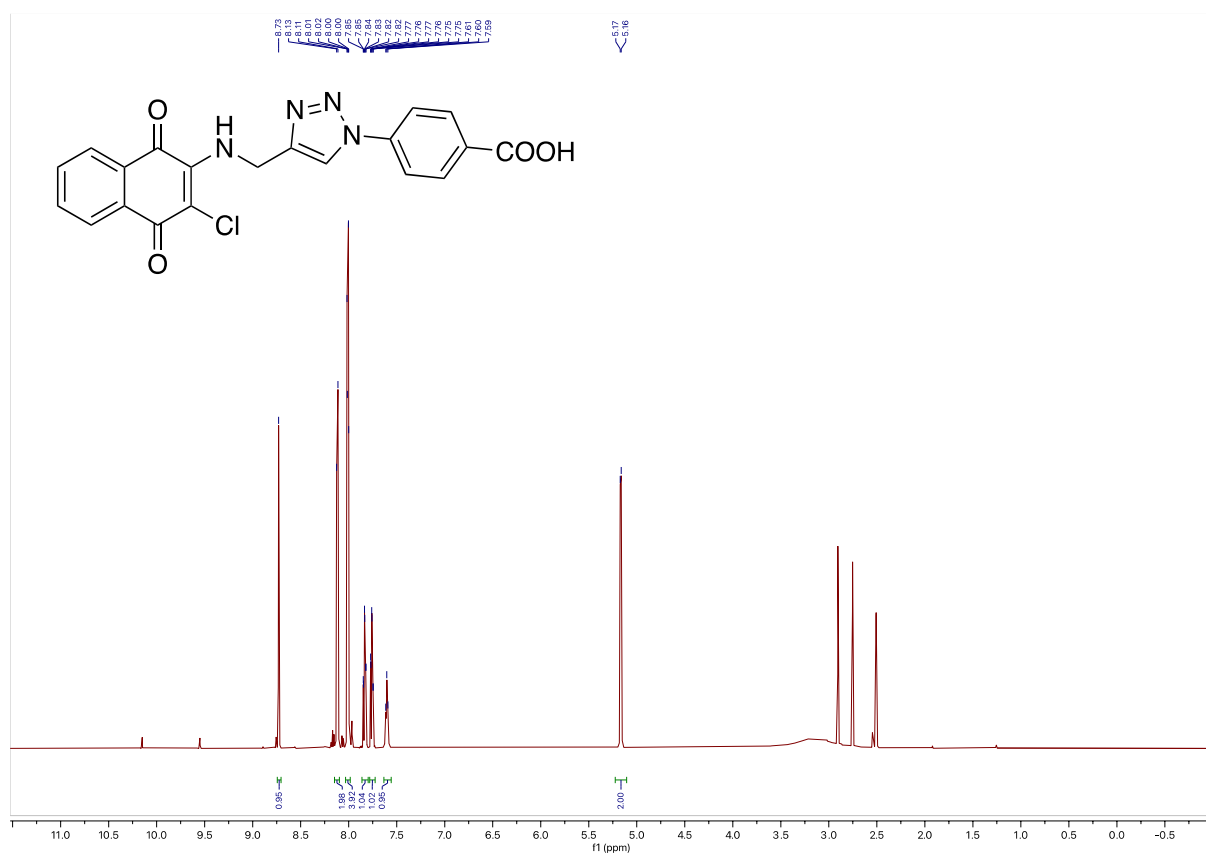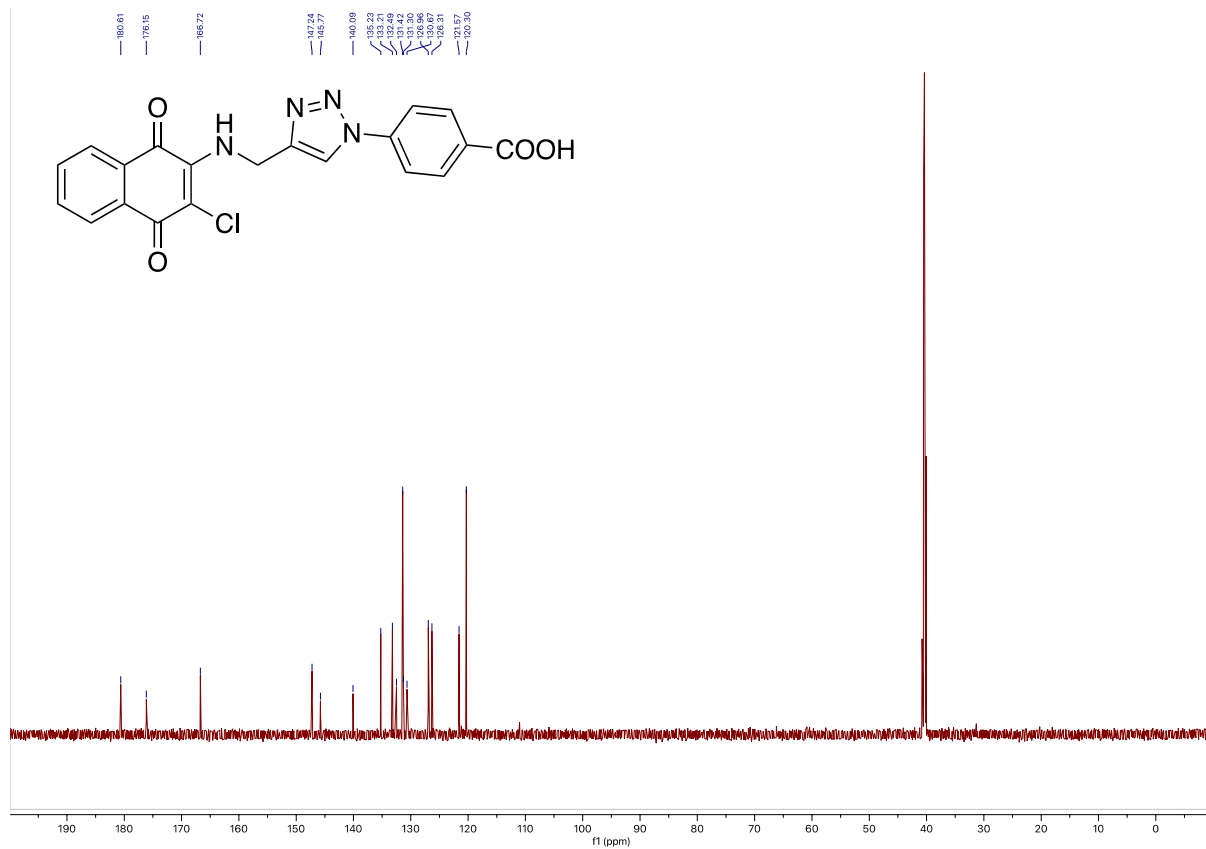

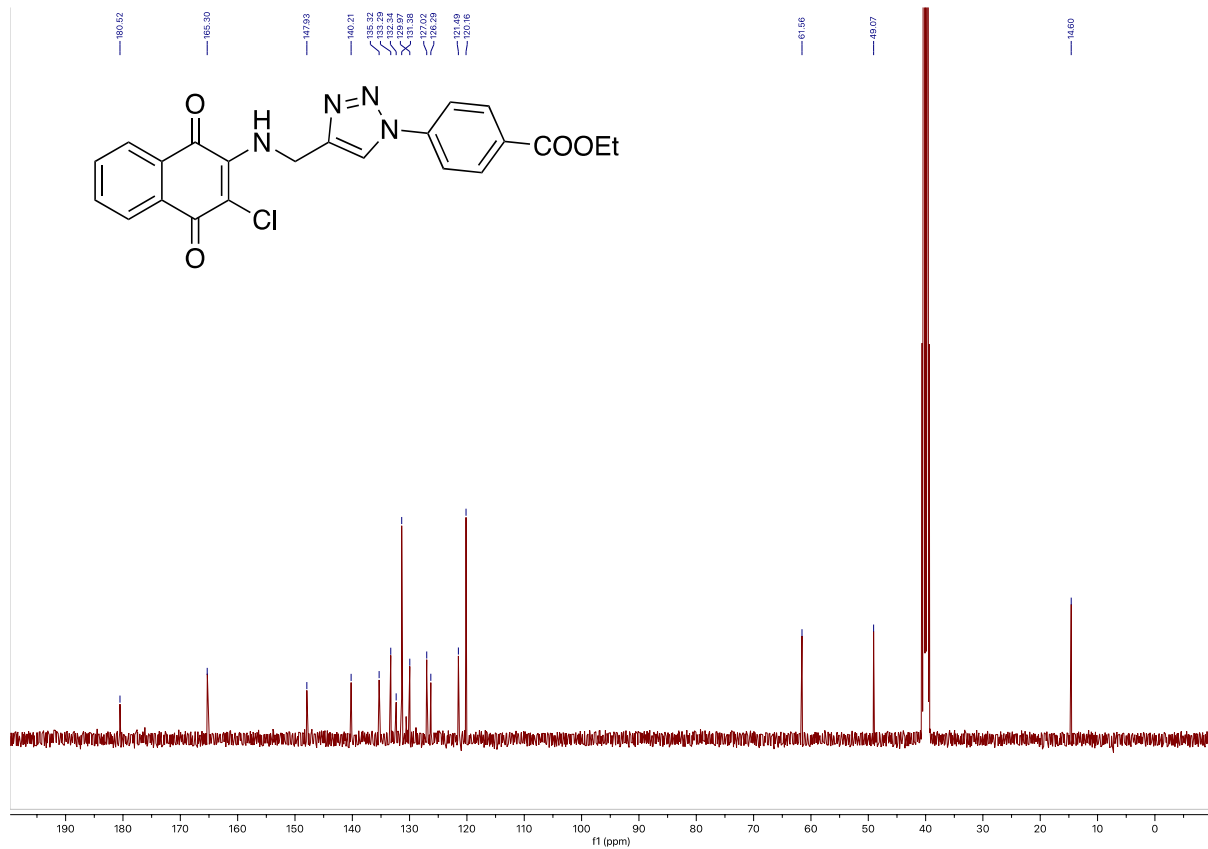

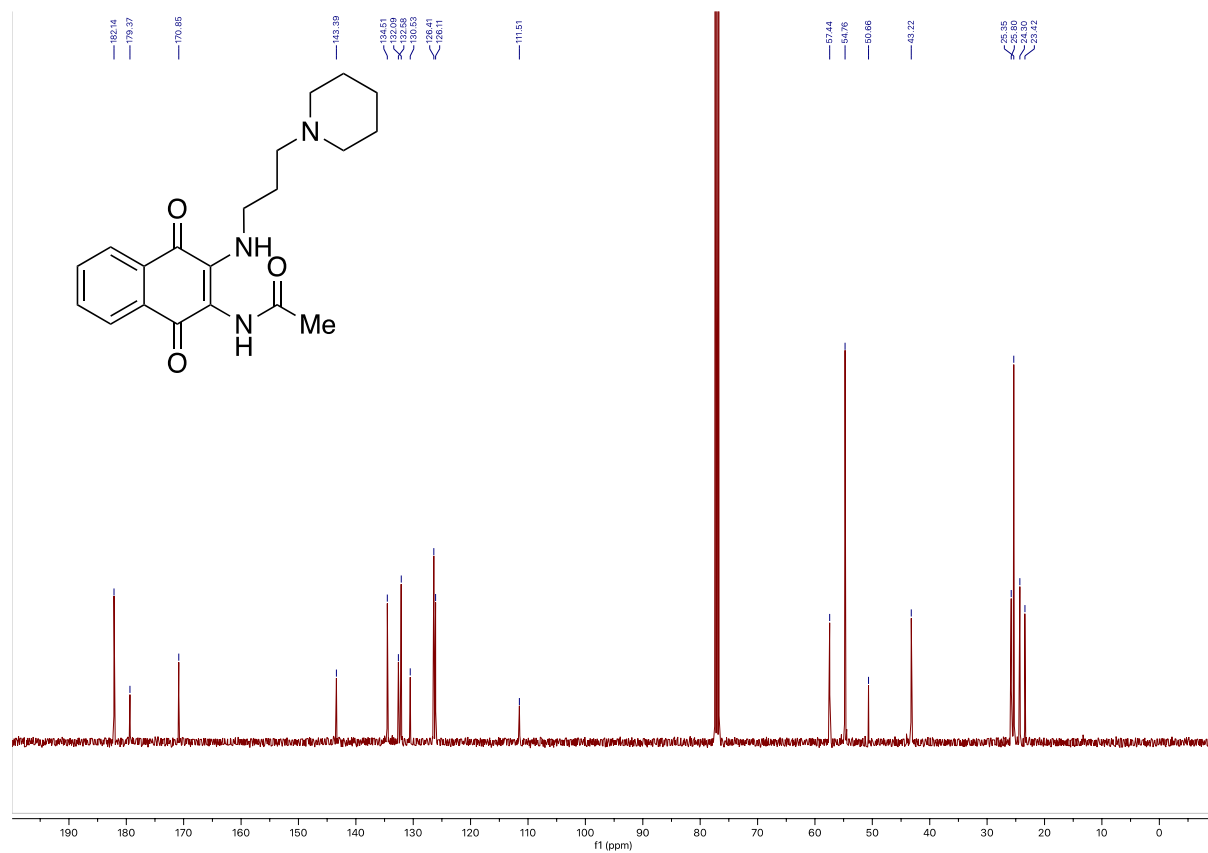



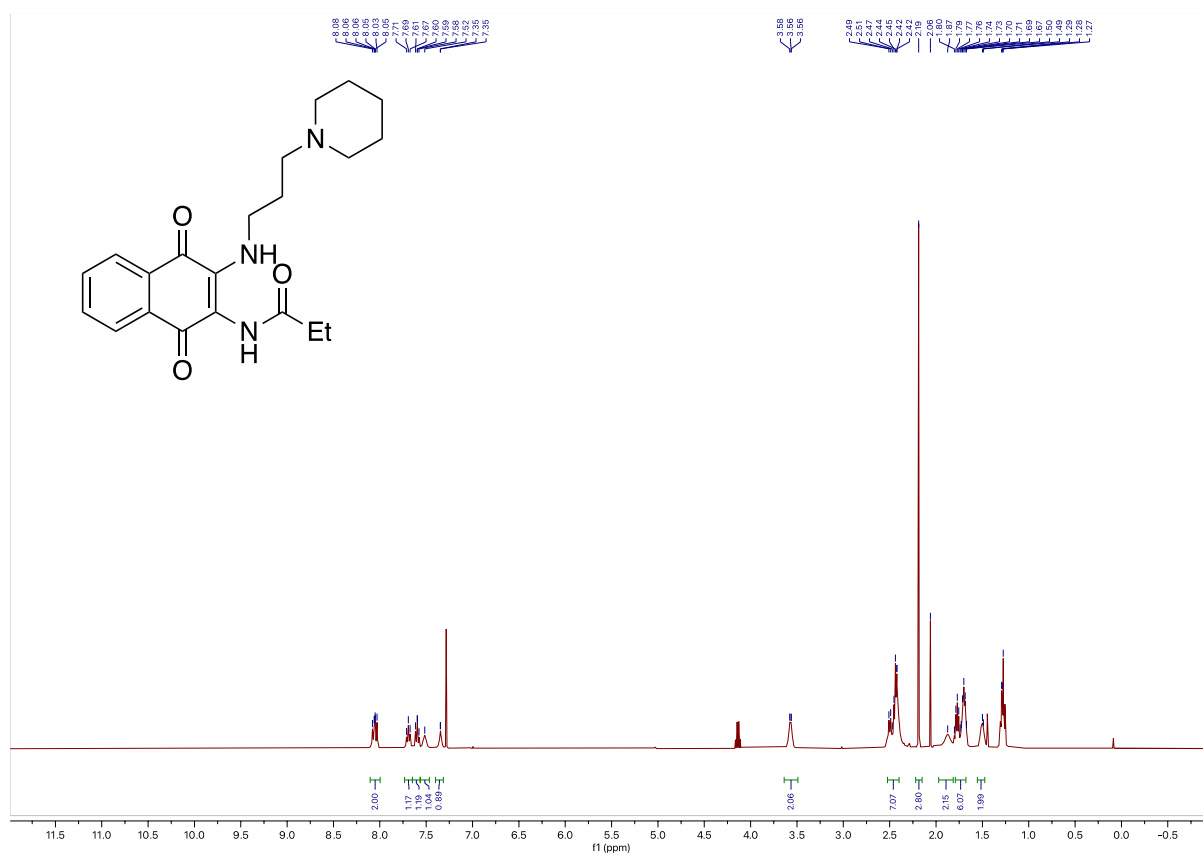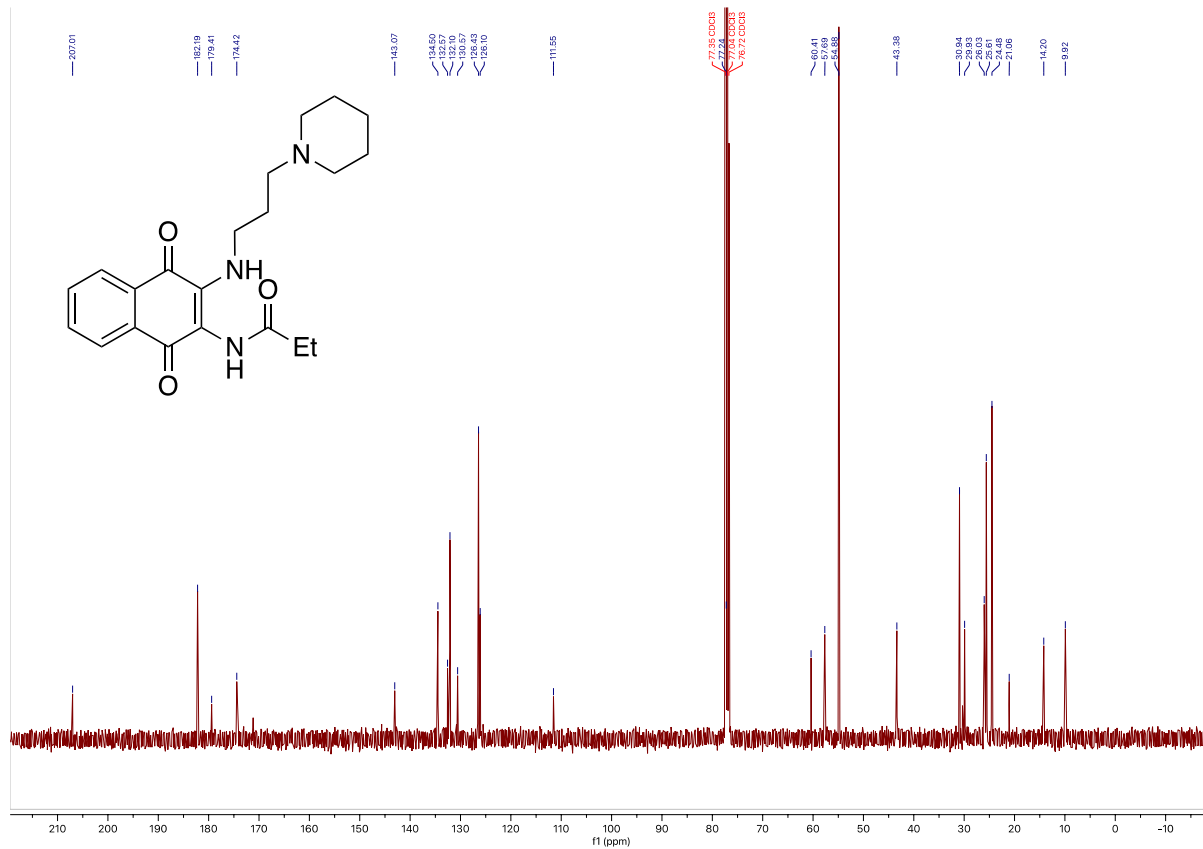

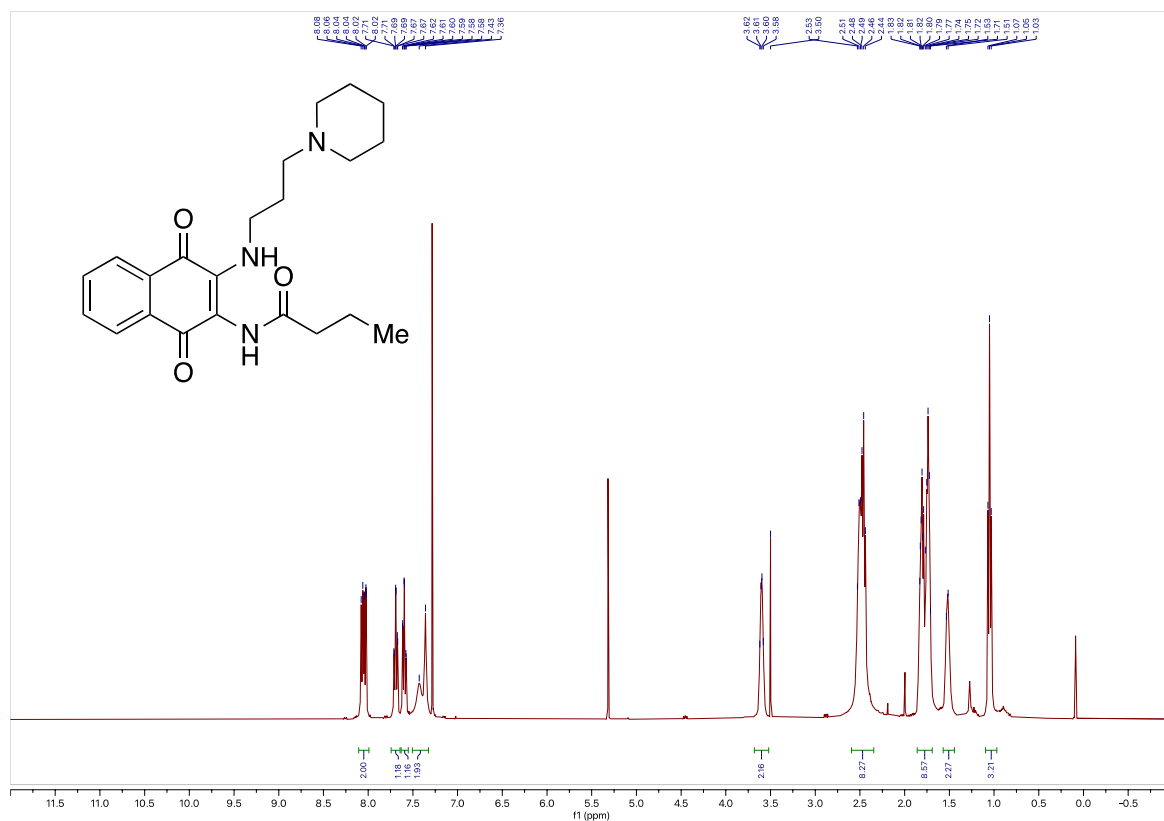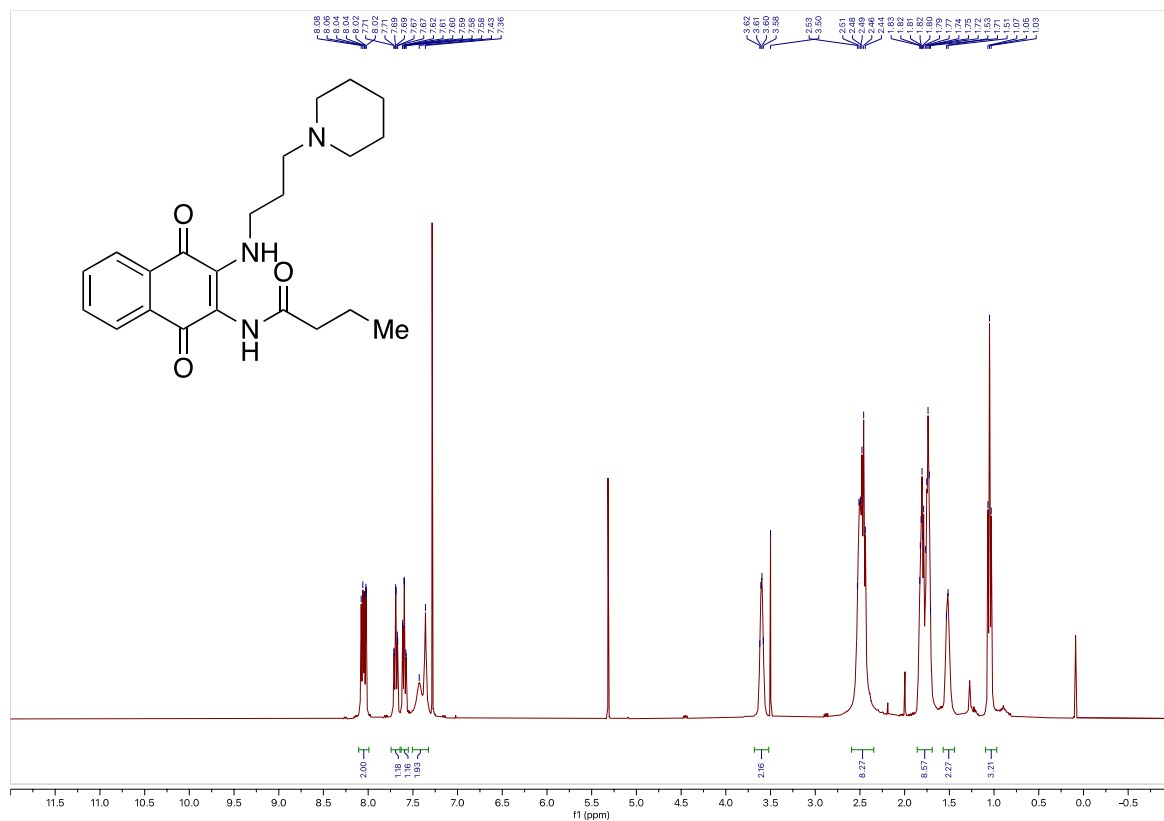

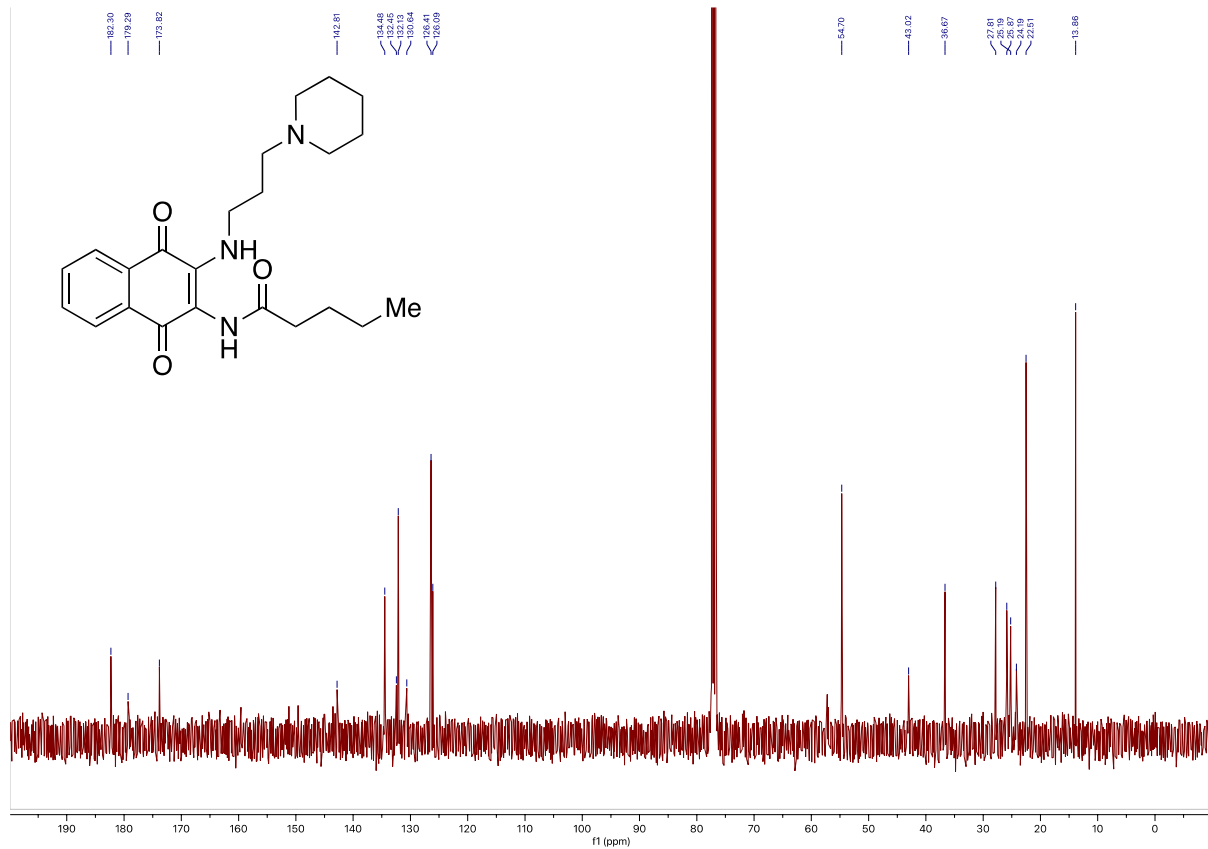

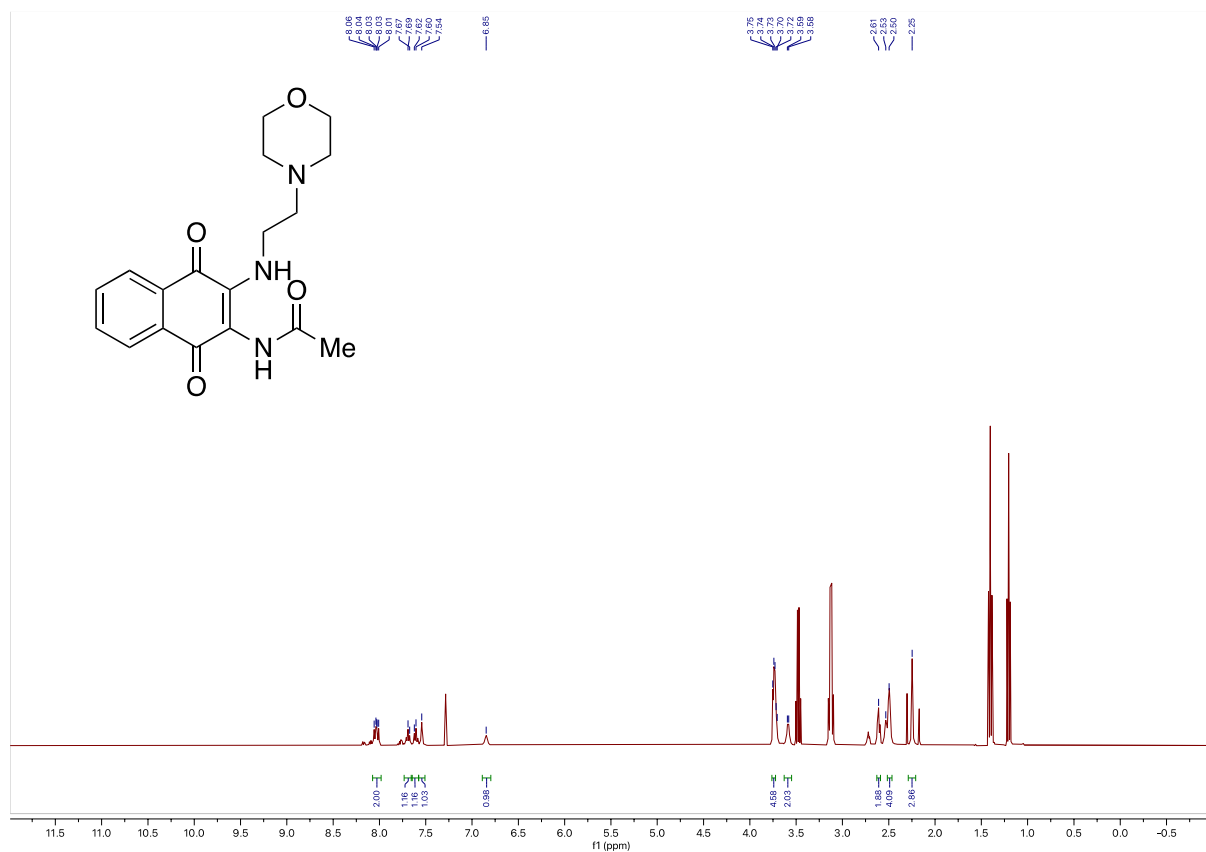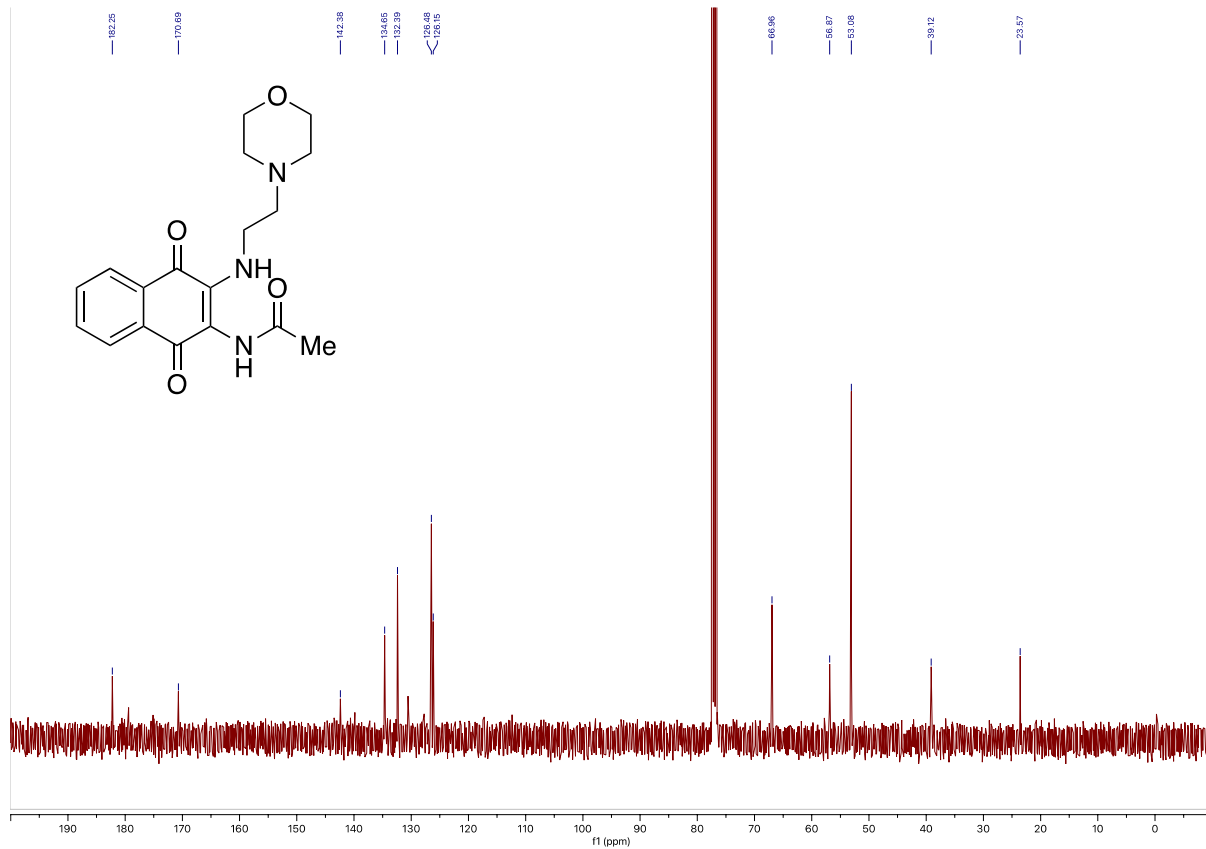

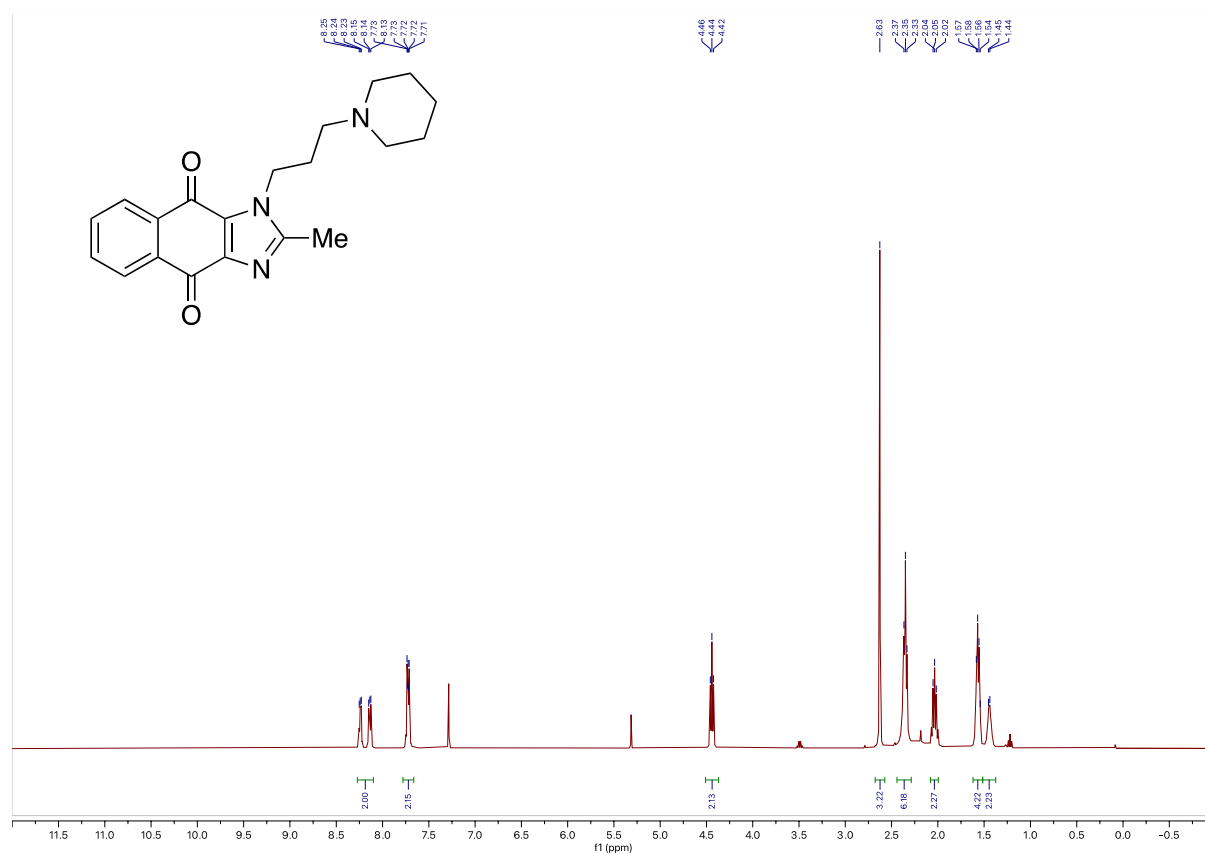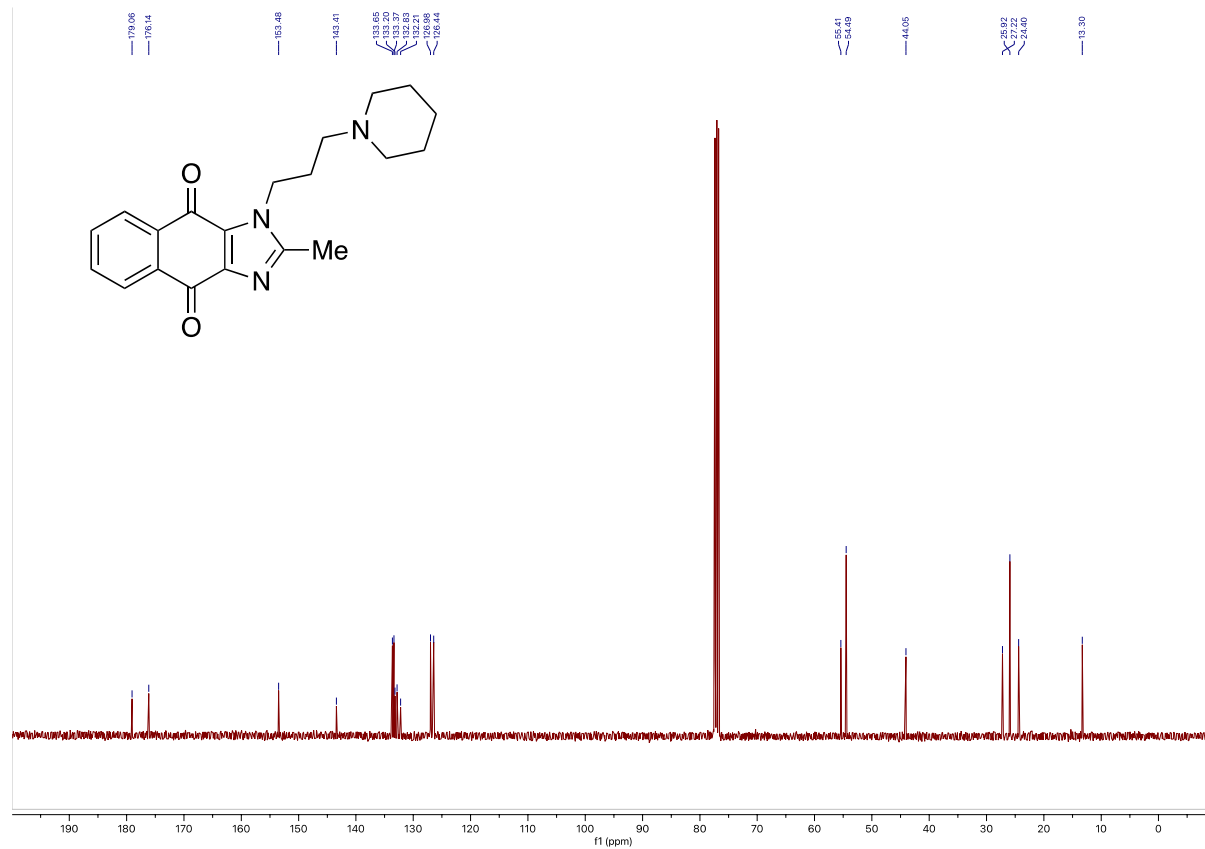

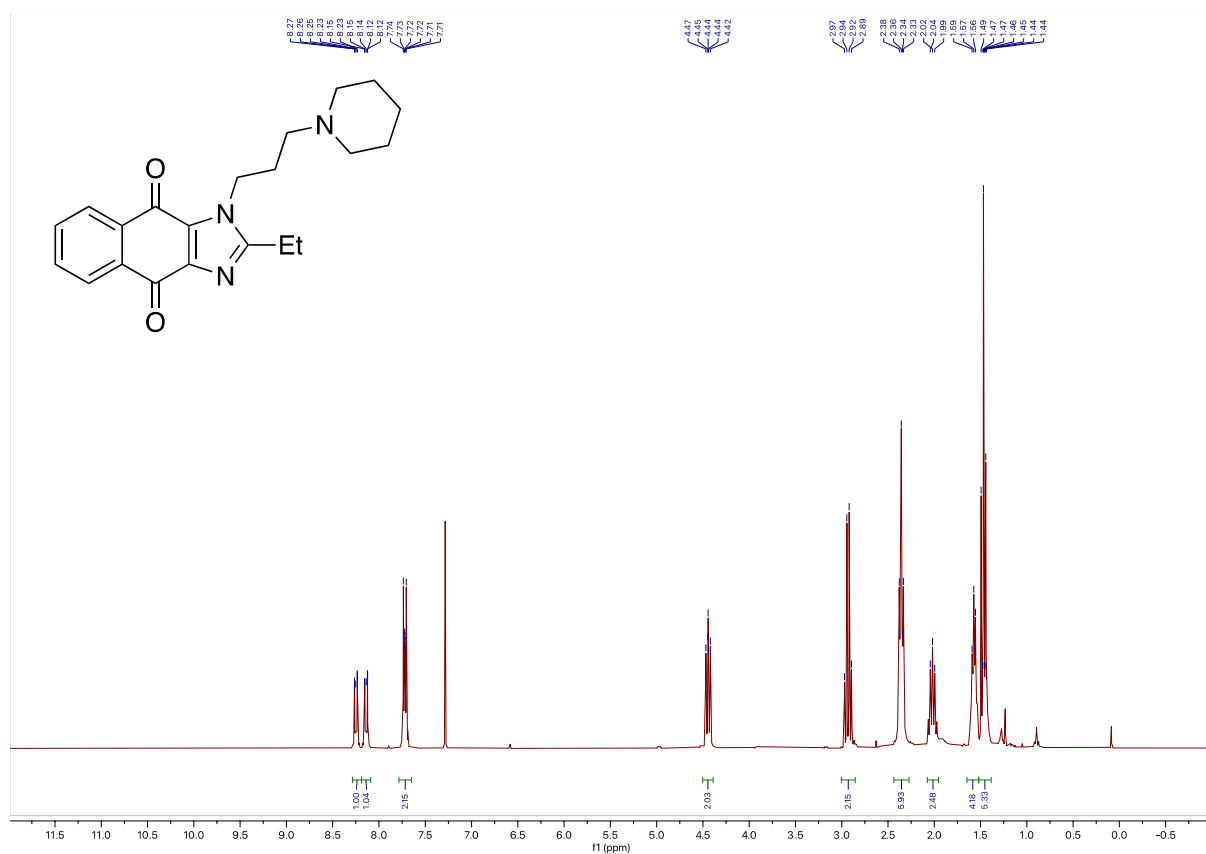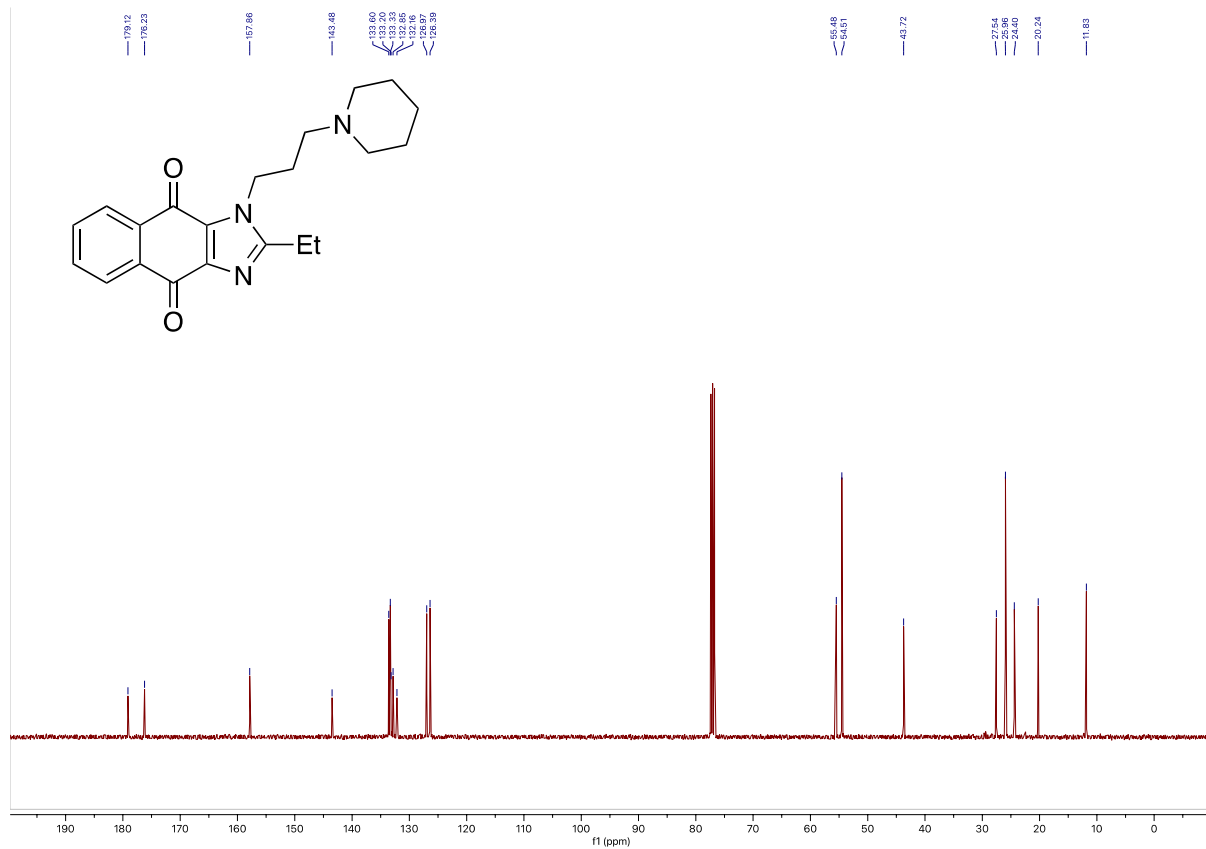

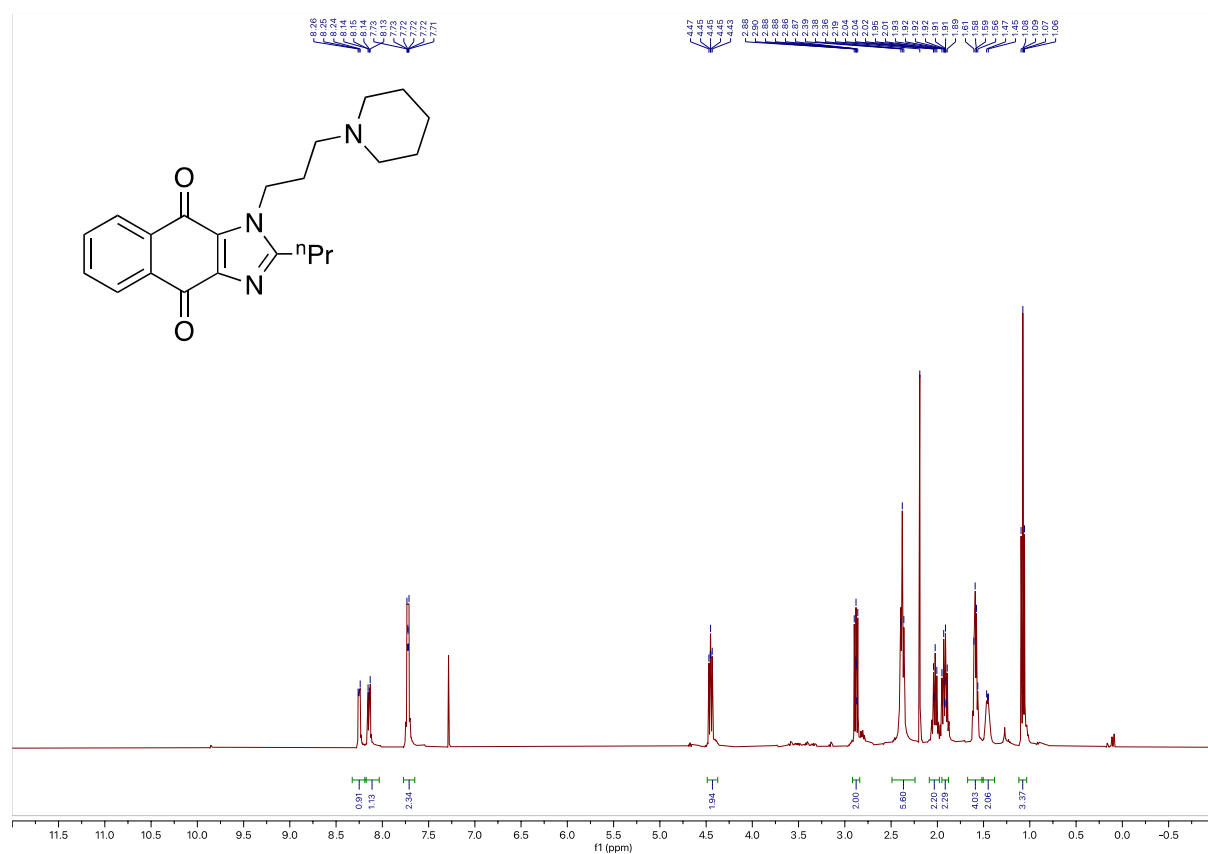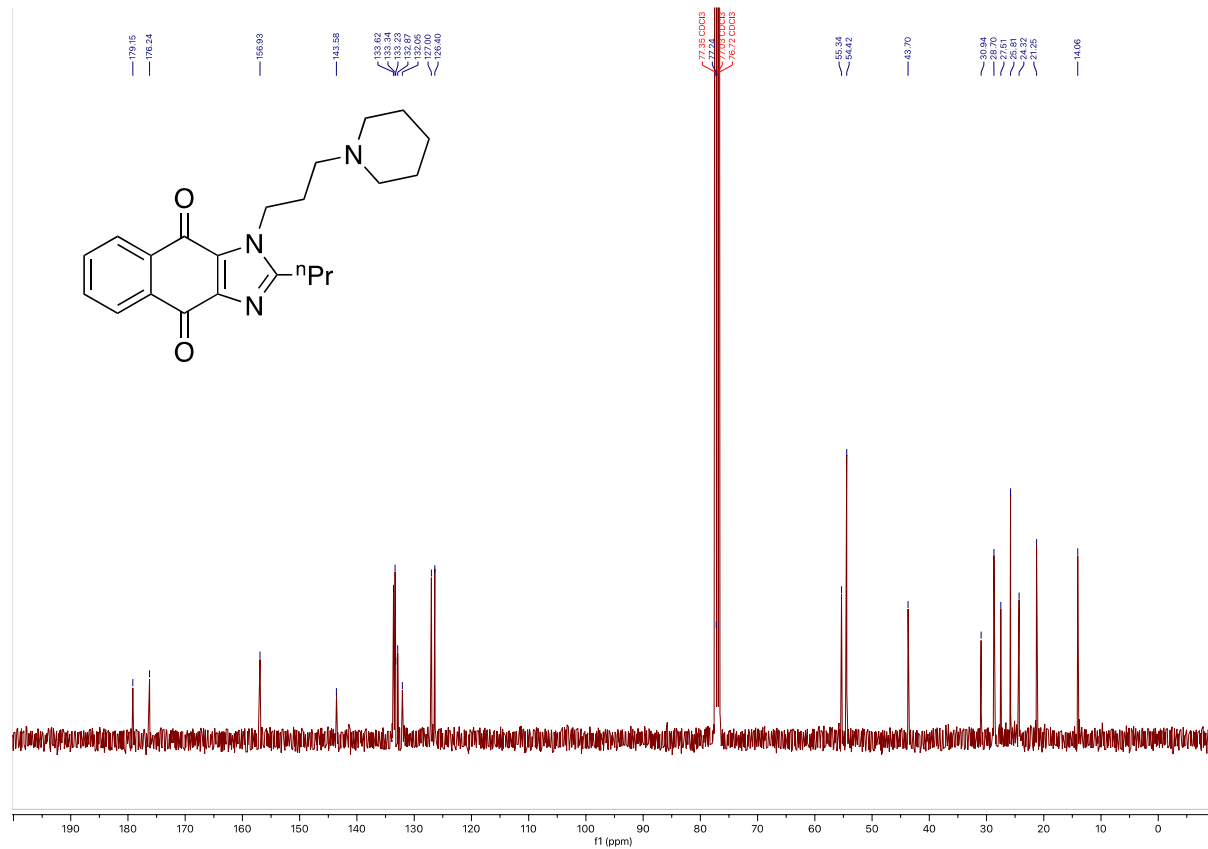

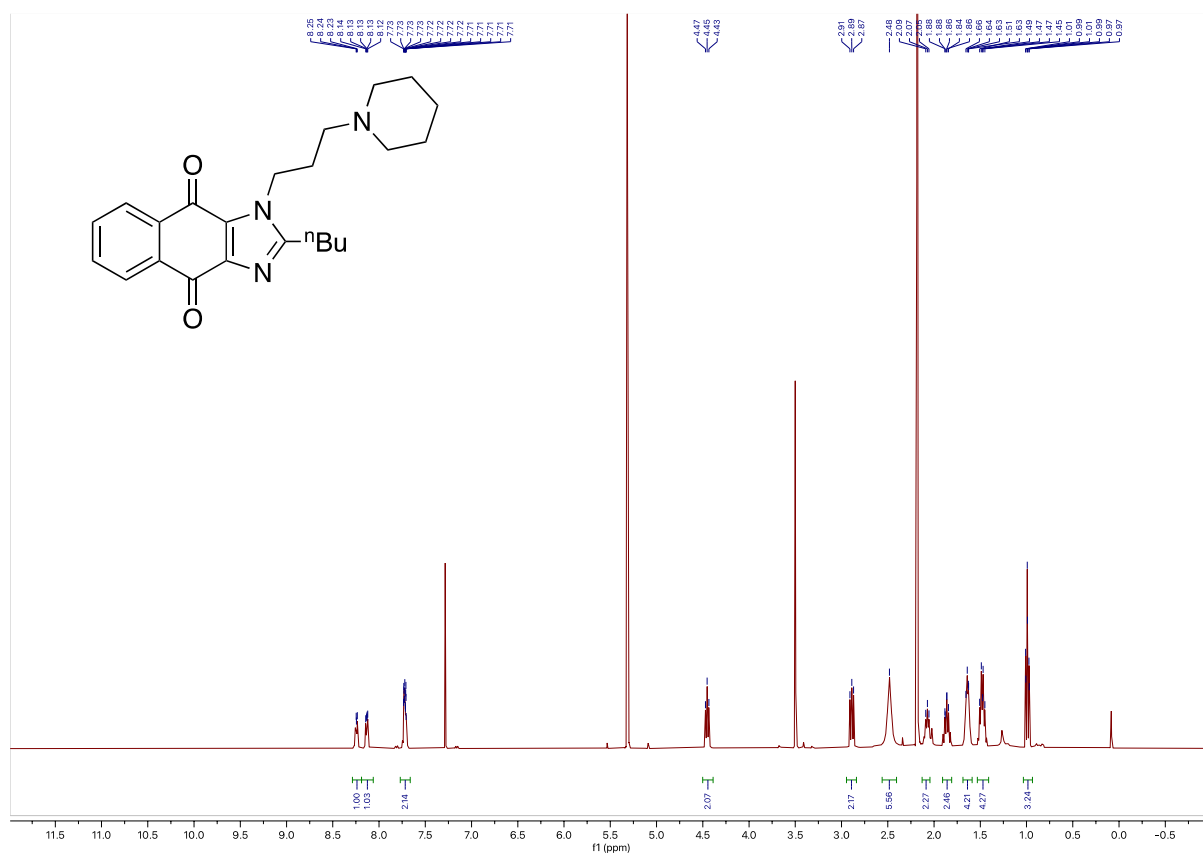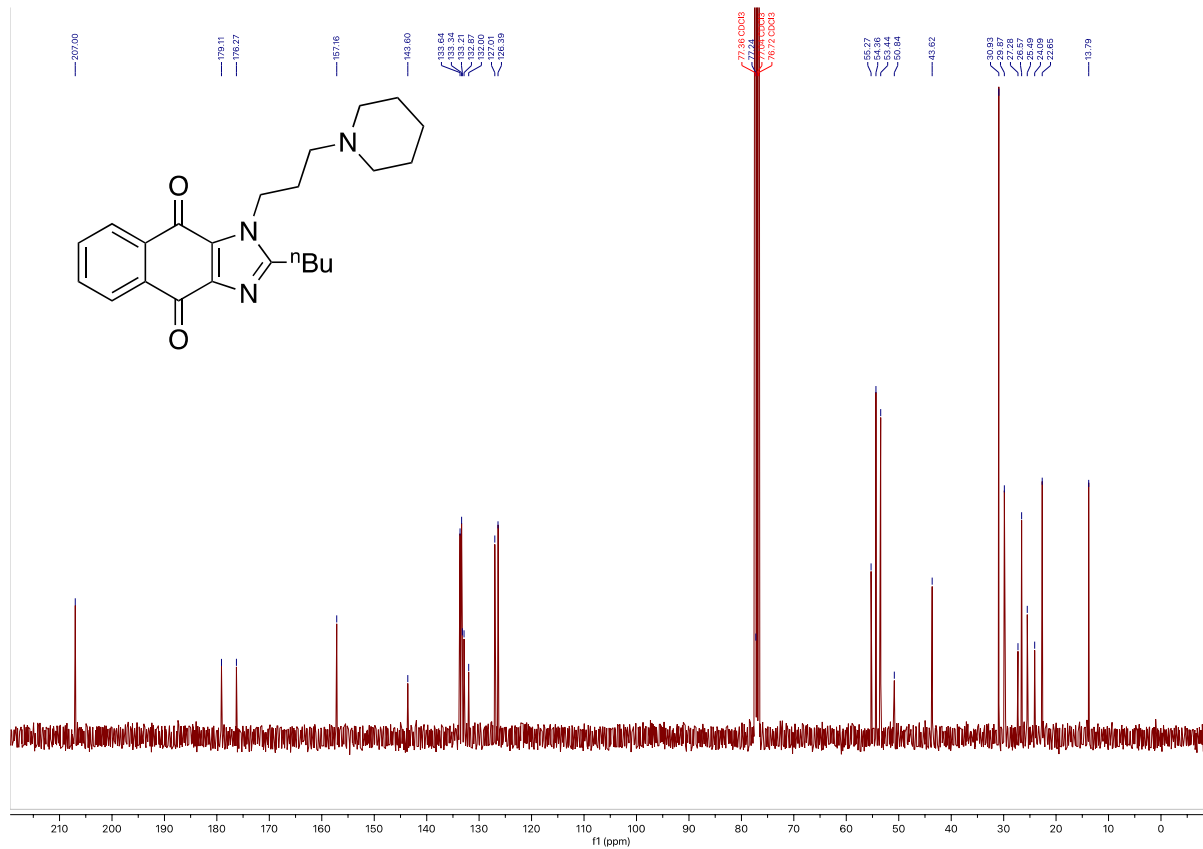



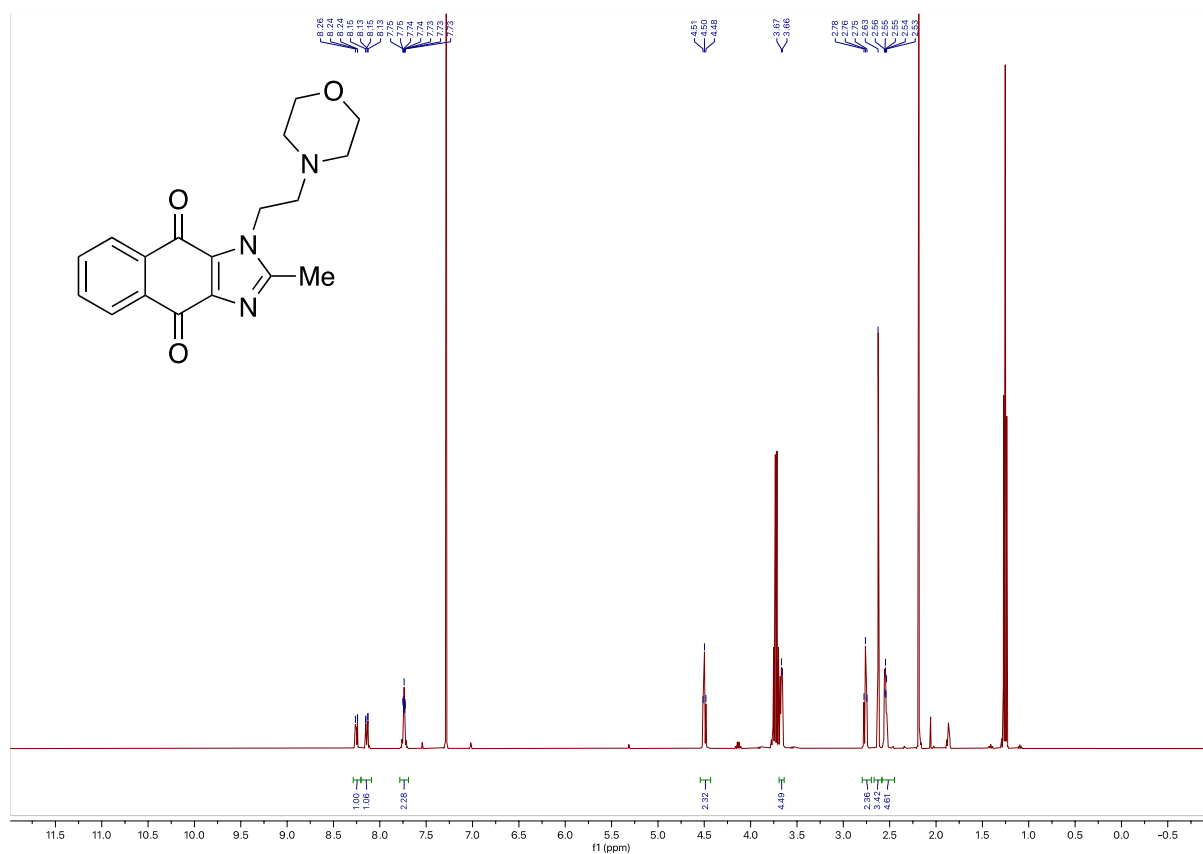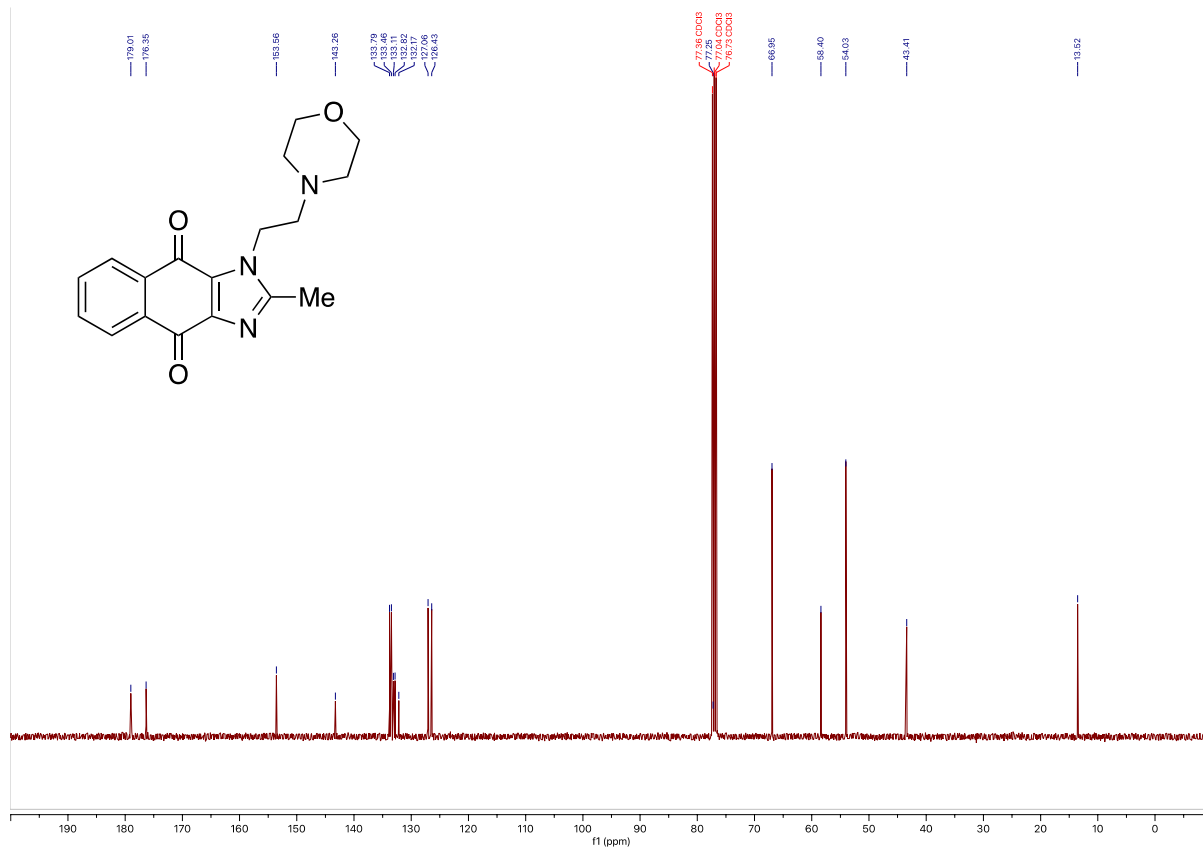

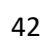

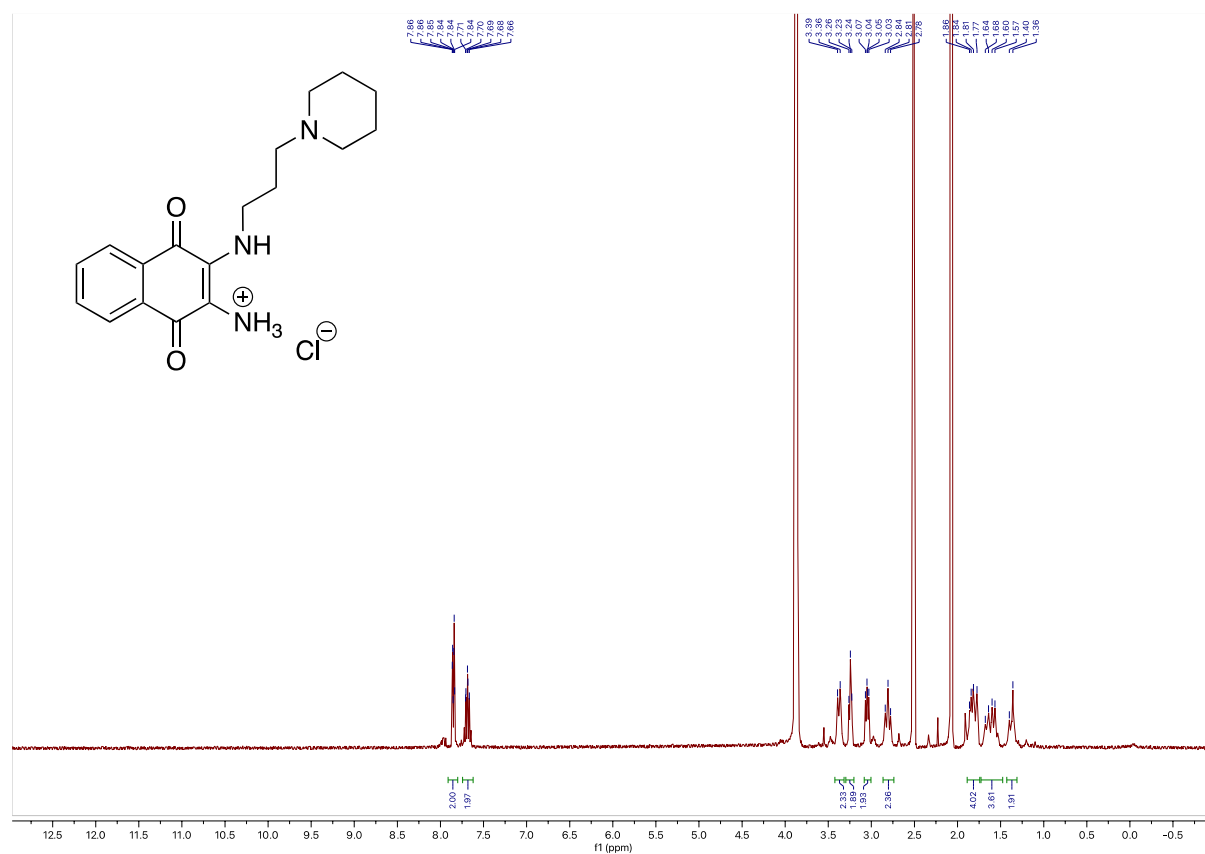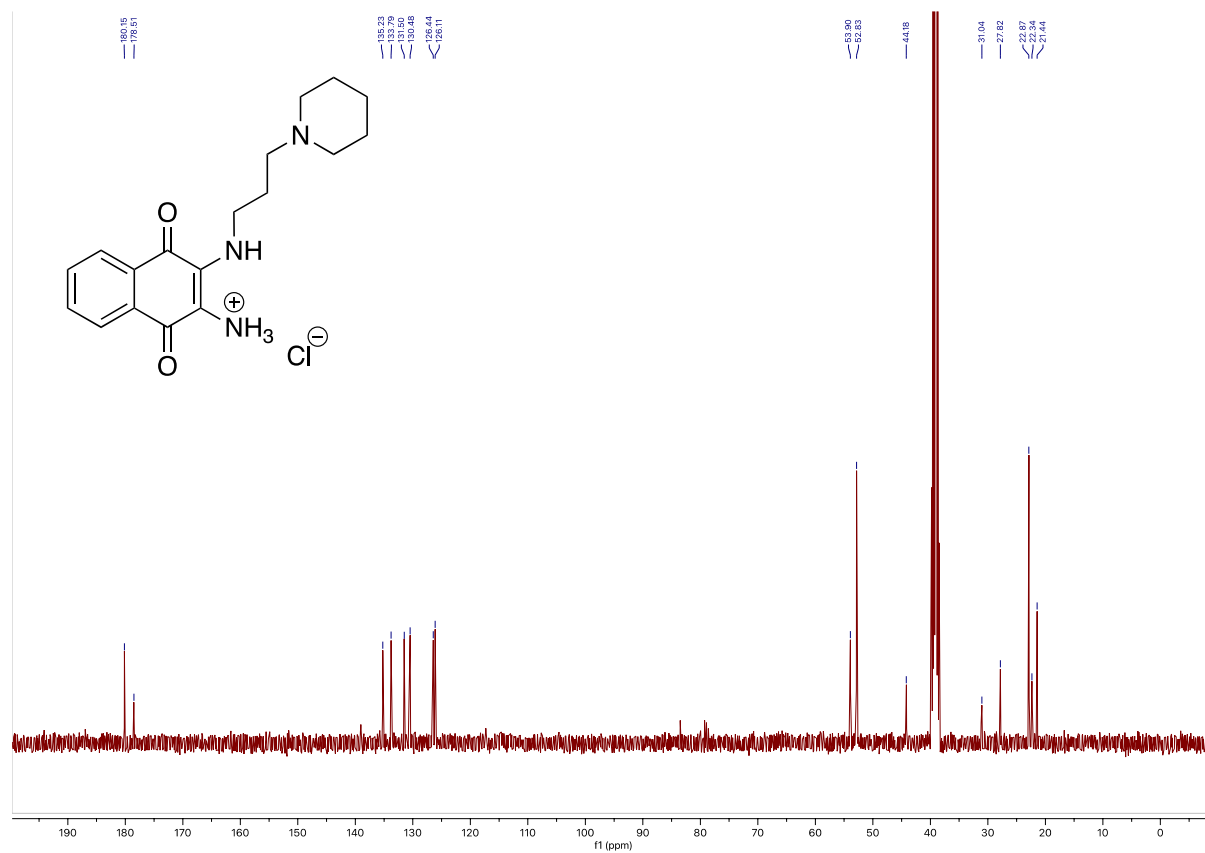

Supplement: d4md00987h1.pdf [file d4md00987h1.pdf]
